# Supplementary material for: Estimated effectiveness of symptom and risk screening to prevent the spread of COVID-19
Source: eLife. 2020 Feb 24;9:e55570. doi: 10.7554/eLife.55570 (PMC7060038; doi:10.7554/eLife.55570)
Supplement: Figure 2—source data 1. — Raw, simulated data, and source data for Figure 2—figures supplement 1, 2 can be found as. RData or. csv files in the supplementary code. [file elife-55570-fig2-data1.csv]

days.since.exposed	fever	meanIncubate	outcome	yymin	yymax
0	50% subclinical	Mean incubation 4.5d	detected: departure fever screen	0	0
0	50% subclinical	Mean incubation 4.5d	detected: departure risk screen	0	0.05
0	50% subclinical	Mean incubation 4.5d	detected: arrival fever screen	0.05	0.0542948847950605
0	50% subclinical	Mean incubation 4.5d	detected: arrival risk screen	0.0542948847950605	0.0916253498689397
0	50% subclinical	Mean incubation 4.5d	missed: had both	0.0916253498689397	0.0918433233453807
0	50% subclinical	Mean incubation 4.5d	missed: had fever	0.0918433233453807	0.0933933569556281
0	50% subclinical	Mean incubation 4.5d	missed: had risk awareness	0.0933933569556281	0.205166778700825
0	50% subclinical	Mean incubation 4.5d	missed: undetectable	0.205166778700825	1
0.1	50% subclinical	Mean incubation 4.5d	detected: departure fever screen	0	8.48026718169107e-07
0.1	50% subclinical	Mean incubation 4.5d	detected: departure risk screen	8.48026718169107e-07	0.0500008056253823
0.1	50% subclinical	Mean incubation 4.5d	detected: arrival fever screen	0.0500008056253823	0.0558707964959202
0.1	50% subclinical	Mean incubation 4.5d	detected: arrival risk screen	0.0558707964959202	0.093139054528976
0.1	50% subclinical	Mean incubation 4.5d	missed: had both	0.093139054528976	0.0934369675994732
0.1	50% subclinical	Mean incubation 4.5d	missed: had fever	0.0934369675994732	0.0955554605452313
0.1	50% subclinical	Mean incubation 4.5d	missed: had risk awareness	0.0955554605452313	0.207062321573901
0.1	50% subclinical	Mean incubation 4.5d	missed: undetectable	0.207062321573901	1
0.2	50% subclinical	Mean incubation 4.5d	detected: departure fever screen	0	1.2641111107242e-05
0.2	50% subclinical	Mean incubation 4.5d	detected: departure risk screen	1.2641111107242e-05	0.0500120090555519
0.2	50% subclinical	Mean incubation 4.5d	detected: arrival fever screen	0.0500120090555519	0.0577678222686364
0.2	50% subclinical	Mean incubation 4.5d	detected: arrival risk screen	0.0577678222686364	0.0949611977054008
0.2	50% subclinical	Mean incubation 4.5d	missed: had both	0.0949611977054008	0.0953548198045611
0.2	50% subclinical	Mean incubation 4.5d	missed: had fever	0.0953548198045611	0.0981539102874788
0.2	50% subclinical	Mean incubation 4.5d	missed: had risk awareness	0.0981539102874788	0.209340414498612
0.2	50% subclinical	Mean incubation 4.5d	missed: undetectable	0.209340414498612	1
0.3	50% subclinical	Mean incubation 4.5d	detected: departure fever screen	0	5.96348782274944e-05
0.3	50% subclinical	Mean incubation 4.5d	detected: departure risk screen	5.96348782274944e-05	0.0500566531343161
0.3	50% subclinical	Mean incubation 4.5d	detected: arrival fever screen	0.0500566531343161	0.0600059424389521
0.3	50% subclinical	Mean incubation 4.5d	detected: arrival risk screen	0.0600059424389521	0.0971109710268882
0.3	50% subclinical	Mean incubation 4.5d	missed: had both	0.0971109710268882	0.0976159161607701
0.3	50% subclinical	Mean incubation 4.5d	missed: had fever	0.0976159161607701	0.101206637112819
0.3	50% subclinical	Mean incubation 4.5d	missed: had risk awareness	0.101206637112819	0.212016777742746
0.3	50% subclinical	Mean incubation 4.5d	missed: undetectable	0.212016777742746	1
0.4	50% subclinical	Mean incubation 4.5d	detected: departure fever screen	0	0.000175671408427575
0.4	50% subclinical	Mean incubation 4.5d	detected: departure risk screen	0.000175671408427575	0.0501668878380062
0.4	50% subclinical	Mean incubation 4.5d	detected: arrival fever screen	0.0501668878380062	0.0626029188307435
0.4	50% subclinical	Mean incubation 4.5d	detected: arrival risk screen	0.0626029188307435	0.0996054351926878
0.4	50% subclinical	Mean incubation 4.5d	missed: had both	0.0996054351926878	0.100236587141567
0.4	50% subclinical	Mean incubation 4.5d	missed: had fever	0.100236587141567	0.104724778778044
0.4	50% subclinical	Mean incubation 4.5d	missed: had risk awareness	0.104724778778044	0.215101175914997
0.4	50% subclinical	Mean incubation 4.5d	missed: undetectable	0.215101175914997	1
0.5	50% subclinical	Mean incubation 4.5d	detected: departure fever screen	0	0.000399838050617585
0.5	50% subclinical	Mean incubation 4.5d	detected: departure risk screen	0.000399838050617585	0.0503798461480867
0.5	50% subclinical	Mean incubation 4.5d	detected: arrival fever screen	0.0503798461480867	0.0655733095471496
0.5	50% subclinical	Mean incubation 4.5d	detected: arrival risk screen	0.0655733095471496	0.102458573643973
0.5	50% subclinical	Mean incubation 4.5d	missed: had both	0.102458573643973	0.103229670470617
0.5	50% subclinical	Mean incubation 4.5d	missed: had fever	0.103229670470617	0.108713025682309
0.5	50% subclinical	Mean incubation 4.5d	missed: had risk awareness	0.108713025682309	0.218597721146134
0.5	50% subclinical	Mean incubation 4.5d	missed: undetectable	0.218597721146134	1
0.6	50% subclinical	Mean incubation 4.5d	detected: departure fever screen	0	0.000773126798638021
0.6	50% subclinical	Mean incubation 4.5d	detected: departure risk screen	0.000773126798638021	0.0507344704587061
0.6	50% subclinical	Mean incubation 4.5d	detected: arrival fever screen	0.0507344704587061	0.0689278492484259
0.6	50% subclinical	Mean incubation 4.5d	detected: arrival risk screen	0.0689278492484259	0.105680697304409
0.6	50% subclinical	Mean incubation 4.5d	missed: had both	0.105680697304409	0.106604045476068
0.6	50% subclinical	Mean incubation 4.5d	missed: had fever	0.106604045476068	0.113170076918974
0.6	50% subclinical	Mean incubation 4.5d	missed: had risk awareness	0.113170076918974	0.222505272915265
0.6	50% subclinical	Mean incubation 4.5d	missed: undetectable	0.222505272915265	1
0.7	50% subclinical	Mean incubation 4.5d	detected: departure fever screen	0	0.00133591738993563
0.7	50% subclinical	Mean incubation 4.5d	detected: departure risk screen	0.00133591738993563	0.0512691215204389
0.7	50% subclinical	Mean incubation 4.5d	detected: arrival fever screen	0.0512691215204389	0.0726731177571013
0.7	50% subclinical	Mean incubation 4.5d	detected: arrival risk screen	0.0726731177571013	0.109278126266689
0.7	50% subclinical	Mean incubation 4.5d	missed: had both	0.109278126266689	0.110364419308776
0.7	50% subclinical	Mean incubation 4.5d	missed: had fever	0.110364419308776	0.118089169830278
0.7	50% subclinical	Mean incubation 4.5d	missed: had risk awareness	0.118089169830278	0.226817902316956
0.7	50% subclinical	Mean incubation 4.5d	missed: undetectable	0.226817902316956	1
0.8	50% subclinical	Mean incubation 4.5d	detected: departure fever screen	0	0.00212613420300682
0.8	50% subclinical	Mean incubation 4.5d	detected: departure risk screen	0.00212613420300682	0.0520198274928565
0.8	50% subclinical	Mean incubation 4.5d	detected: arrival fever screen	0.0520198274928565	0.0768114327517385
0.8	50% subclinical	Mean incubation 4.5d	detected: arrival risk screen	0.0768114327517385	0.113253086722065
0.8	50% subclinical	Mean incubation 4.5d	missed: had both	0.113253086722065	0.114511307289715
0.8	50% subclinical	Mean incubation 4.5d	missed: had fever	0.114511307289715	0.123458653548559
0.8	50% subclinical	Mean incubation 4.5d	missed: had risk awareness	0.123458653548559	0.231525394891888
0.8	50% subclinical	Mean incubation 4.5d	missed: undetectable	0.231525394891888	1
0.9	50% subclinical	Mean incubation 4.5d	detected: departure fever screen	0	0.0031779502300539
0.9	50% subclinical	Mean incubation 4.5d	detected: departure risk screen	0.0031779502300539	0.0530190527185512
0.9	50% subclinical	Mean incubation 4.5d	detected: arrival fever screen	0.0530190527185512	0.0813409133436435
0.9	50% subclinical	Mean incubation 4.5d	detected: arrival risk screen	0.0813409133436435	0.117603772027447
0.9	50% subclinical	Mean incubation 4.5d	missed: had both	0.117603772027447	0.119041159690751
0.9	50% subclinical	Mean incubation 4.5d	missed: had fever	0.119041159690751	0.129262583074243
0.9	50% subclinical	Mean incubation 4.5d	missed: had risk awareness	0.129262583074243	0.23661377146235
0.9	50% subclinical	Mean incubation 4.5d	missed: undetectable	0.23661377146235	1
1	50% subclinical	Mean incubation 4.5d	detected: departure fever screen	0	0.00452093136322157
1	50% subclinical	Mean incubation 4.5d	detected: departure risk screen	0.00452093136322157	0.0542948847950605
1	50% subclinical	Mean incubation 4.5d	detected: arrival fever screen	0.0542948847950605	0.0862556707213833
1	50% subclinical	Mean incubation 4.5d	detected: arrival risk screen	0.0862556707213833	0.122324525824487
1	50% subclinical	Mean incubation 4.5d	missed: had both	0.122324525824487	0.123946595786913
1	50% subclinical	Mean incubation 4.5d	missed: had fever	0.123946595786913	0.135481315519721
1	50% subclinical	Mean incubation 4.5d	missed: had risk awareness	0.135481315519721	0.242065810866605
1	50% subclinical	Mean incubation 4.5d	missed: undetectable	0.242065810866605	1
1.1	50% subclinical	Mean incubation 4.5d	detected: departure fever screen	0	0.0061795313771637
1.1	50% subclinical	Mean incubation 4.5d	detected: departure risk screen	0.0061795313771637	0.0558705548083055
1.1	50% subclinical	Mean incubation 4.5d	detected: arrival fever screen	0.0558705548083055	0.0915460900189069
1.1	50% subclinical	Mean incubation 4.5d	detected: arrival risk screen	0.0915460900189069	0.127406112781318
1.1	50% subclinical	Mean incubation 4.5d	missed: had both	0.127406112781318	0.129216713252533
1.1	50% subclinical	Mean incubation 4.5d	missed: had fever	0.129216713252533	0.142092094381171
1.1	50% subclinical	Mean incubation 4.5d	missed: had risk awareness	0.142092094381171	0.247861562197191
1.1	50% subclinical	Mean incubation 4.5d	missed: undetectable	0.247861562197191	1
1.2	50% subclinical	Mean incubation 4.5d	detected: departure fever screen	0	0.00817286268628514
1.2	50% subclinical	Mean incubation 4.5d	detected: departure risk screen	0.00817286268628514	0.0577642195519709
1.2	50% subclinical	Mean incubation 4.5d	detected: arrival fever screen	0.0577642195519709	0.097199174309001
1.2	50% subclinical	Mean incubation 4.5d	detected: arrival risk screen	0.097199174309001	0.13283604900733
1.2	50% subclinical	Mean incubation 4.5d	missed: had both	0.13283604900733	0.134837447087104
1.2	50% subclinical	Mean incubation 4.5d	missed: had fever	0.134837447087104	0.149069611209942
1.2	50% subclinical	Mean incubation 4.5d	missed: had risk awareness	0.149069611209942	0.253978837225155
1.2	50% subclinical	Mean incubation 4.5d	missed: undetectable	0.253978837225155	1
1.3	50% subclinical	Mean incubation 4.5d	detected: departure fever screen	0	0.0105146805249024
1.3	50% subclinical	Mean incubation 4.5d	detected: departure risk screen	0.0105146805249024	0.0599889464986572
1.3	50% subclinical	Mean incubation 4.5d	detected: arrival fever screen	0.0599889464986572	0.103198927314431
1.3	50% subclinical	Mean incubation 4.5d	detected: arrival risk screen	0.103198927314431	0.138598969657282
1.3	50% subclinical	Mean incubation 4.5d	missed: had both	0.138598969657282	0.140791957405451
1.3	50% subclinical	Mean incubation 4.5d	missed: had fever	0.140791957405451	0.156386536947986
1.3	50% subclinical	Mean incubation 4.5d	missed: had risk awareness	0.156386536947986	0.260393676228372
1.3	50% subclinical	Mean incubation 4.5d	missed: undetectable	0.260393676228372	1
1.4	50% subclinical	Mean incubation 4.5d	detected: departure fever screen	0	0.0132135289256228
1.4	50% subclinical	Mean incubation 4.5d	detected: departure risk screen	0.0132135289256228	0.0625528524793416
1.4	50% subclinical	Mean incubation 4.5d	detected: arrival fever screen	0.0625528524793416	0.109526756212219
1.4	50% subclinical	Mean incubation 4.5d	detected: arrival risk screen	0.109526756212219	0.144677015835421
1.4	50% subclinical	Mean incubation 4.5d	missed: had both	0.144677015835421	0.147061029746676
1.4	50% subclinical	Mean incubation 4.5d	missed: had fever	0.147061029746676	0.164014017560045
1.4	50% subclinical	Mean incubation 4.5d	missed: had risk awareness	0.164014017560045	0.267080782518395
1.4	50% subclinical	Mean incubation 4.5d	missed: undetectable	0.267080782518395	1
1.5	50% subclinical	Mean incubation 4.5d	detected: departure fever screen	0	0.0162730060028669
1.5	50% subclinical	Mean incubation 4.5d	detected: departure risk screen	0.0162730060028669	0.0654593557027236
1.5	50% subclinical	Mean incubation 4.5d	detected: arrival fever screen	0.0654593557027236	0.116161879910681
1.5	50% subclinical	Mean incubation 4.5d	detected: arrival risk screen	0.116161879910681	0.151050226756312
1.5	50% subclinical	Mean incubation 4.5d	missed: had both	0.151050226756312	0.153623475165362
1.5	50% subclinical	Mean incubation 4.5d	missed: had fever	0.153623475165362	0.17192213051861
1.5	50% subclinical	Mean incubation 4.5d	missed: had risk awareness	0.17192213051861	0.274013922646452
1.5	50% subclinical	Mean incubation 4.5d	missed: undetectable	0.274013922646452	1
1.6	50% subclinical	Mean incubation 4.5d	detected: departure fever screen	0	0.0196921138008569
1.6	50% subclinical	Mean incubation 4.5d	detected: departure risk screen	0.0196921138008569	0.0687075081108141
1.6	50% subclinical	Mean incubation 4.5d	detected: arrival fever screen	0.0687075081108141	0.12308173151585
1.6	50% subclinical	Mean incubation 4.5d	detected: arrival risk screen	0.12308173151585	0.157696926324435
1.6	50% subclinical	Mean incubation 4.5d	missed: had both	0.157696926324435	0.160456520369427
1.6	50% subclinical	Mean incubation 4.5d	missed: had fever	0.160456520369427	0.180080300244929
1.6	50% subclinical	Mean incubation 4.5d	missed: had risk awareness	0.180080300244929	0.281166290625691
1.6	50% subclinical	Mean incubation 4.5d	missed: undetectable	0.281166290625691	1
1.7	50% subclinical	Mean incubation 4.5d	detected: departure fever screen	0	0.0234656645273364
1.7	50% subclinical	Mean incubation 4.5d	detected: departure risk screen	0.0234656645273364	0.0722923813009696
1.7	50% subclinical	Mean incubation 4.5d	detected: arrival fever screen	0.0722923813009696	0.130262346470716
1.7	50% subclinical	Mean incubation 4.5d	detected: arrival risk screen	0.130262346470716	0.164594095952135
1.7	50% subclinical	Mean incubation 4.5d	missed: had both	0.164594095952135	0.167536180650599
1.7	50% subclinical	Mean incubation 4.5d	missed: had fever	0.167536180650599	0.18845767183968
1.7	50% subclinical	Mean incubation 4.5d	missed: had risk awareness	0.18845767183968	0.288510835585473
1.7	50% subclinical	Mean incubation 4.5d	missed: undetectable	0.288510835585473	1
1.8	50% subclinical	Mean incubation 4.5d	detected: departure fever screen	0	0.0275847205304016
1.8	50% subclinical	Mean incubation 4.5d	detected: departure risk screen	0.0275847205304016	0.0762054845038815
1.8	50% subclinical	Mean incubation 4.5d	detected: arrival fever screen	0.0762054845038815	0.137678730131426
1.8	50% subclinical	Mean incubation 4.5d	detected: arrival risk screen	0.137678730131426	0.171717727626238
1.8	50% subclinical	Mean incubation 4.5d	missed: had both	0.171717727626238	0.174837610393049
1.8	50% subclinical	Mean incubation 4.5d	missed: had fever	0.174837610393049	0.197023443401487
1.8	50% subclinical	Mean incubation 4.5d	missed: had risk awareness	0.197023443401487	0.296020553119111
1.8	50% subclinical	Mean incubation 4.5d	missed: undetectable	0.296020553119111	1
1.9	50% subclinical	Mean incubation 4.5d	detected: departure fever screen	0	0.032037050029556
1.9	50% subclinical	Mean incubation 4.5d	detected: departure risk screen	0.032037050029556	0.0804351975280782
1.9	50% subclinical	Mean incubation 4.5d	detected: arrival fever screen	0.0804351975280782	0.145305200411979
1.9	50% subclinical	Mean incubation 4.5d	detected: arrival risk screen	0.145305200411979	0.179043153027296
1.9	50% subclinical	Mean incubation 4.5d	missed: had both	0.179043153027296	0.18233542760975
1.9	50% subclinical	Mean incubation 4.5d	missed: had fever	0.18233542760975	0.205747157973864
1.9	50% subclinical	Mean incubation 4.5d	missed: had risk awareness	0.205747157973864	0.303668741237361
1.9	50% subclinical	Mean incubation 4.5d	missed: undetectable	0.303668741237361	1
2	50% subclinical	Mean incubation 4.5d	detected: departure fever screen	0	0.036807584508279
2	50% subclinical	Mean incubation 4.5d	detected: departure risk screen	0.036807584508279	0.0849672052828651
2	50% subclinical	Mean incubation 4.5d	detected: arrival fever screen	0.0849672052828651	0.153115702645847
2	50% subclinical	Mean incubation 4.5d	detected: arrival risk screen	0.153115702645847	0.186545345962458
2	50% subclinical	Mean incubation 4.5d	missed: had both	0.186545345962458	0.190004010302308
2	50% subclinical	Mean incubation 4.5d	missed: had fever	0.190004010302308	0.214598956719024
2	50% subclinical	Mean incubation 4.5d	missed: had risk awareness	0.214598956719024	0.311429222329007
2	50% subclinical	Mean incubation 4.5d	missed: undetectable	0.311429222329007	1
2.1	50% subclinical	Mean incubation 4.5d	detected: departure fever screen	0	0.0418788669225423
2.1	50% subclinical	Mean incubation 4.5d	detected: departure risk screen	0.0418788669225423	0.0897849235764152
2.1	50% subclinical	Mean incubation 4.5d	detected: arrival fever screen	0.0897849235764152	0.161084095033736
2.1	50% subclinical	Mean incubation 4.5d	detected: arrival risk screen	0.161084095033736	0.194199196545562
2.1	50% subclinical	Mean incubation 4.5d	missed: had both	0.194199196545562	0.19781776351802
2.1	50% subclinical	Mean incubation 4.5d	missed: had fever	0.19781776351802	0.223549795322166
2.1	50% subclinical	Mean incubation 4.5d	missed: had risk awareness	0.223549795322166	0.319276532885187
2.1	50% subclinical	Mean incubation 4.5d	missed: undetectable	0.319276532885187	1
2.2	50% subclinical	Mean incubation 4.5d	detected: departure fever screen	0	0.0472314825720103
2.2	50% subclinical	Mean incubation 4.5d	detected: departure risk screen	0.0472314825720103	0.0948699084434098
2.2	50% subclinical	Mean incubation 4.5d	detected: arrival fever screen	0.0948699084434098	0.169184404018047
2.2	50% subclinical	Mean incubation 4.5d	detected: arrival risk screen	0.169184404018047	0.201979756491019
2.2	50% subclinical	Mean incubation 4.5d	missed: had both	0.201979756491019	0.205751356830333
2.2	50% subclinical	Mean incubation 4.5d	missed: had fever	0.205751356830333	0.232571625909901
2.2	50% subclinical	Mean incubation 4.5d	missed: had risk awareness	0.232571625909901	0.327186082989502
2.2	50% subclinical	Mean incubation 4.5d	missed: undetectable	0.327186082989502	1
2.3	50% subclinical	Mean incubation 4.5d	detected: departure fever screen	0	0.0528444666998251
2.3	50% subclinical	Mean incubation 4.5d	detected: departure risk screen	0.0528444666998251	0.100202243364834
2.3	50% subclinical	Mean incubation 4.5d	detected: arrival fever screen	0.100202243364834	0.177391049686657
2.3	50% subclinical	Mean incubation 4.5d	detected: arrival risk screen	0.177391049686657	0.209862455620078
2.3	50% subclinical	Mean incubation 4.5d	missed: had both	0.209862455620078	0.213779932632652
2.3	50% subclinical	Mean incubation 4.5d	missed: had fever	0.213779932632652	0.241637546944287
2.3	50% subclinical	Mean incubation 4.5d	missed: had risk awareness	0.241637546944287	0.335134287731978
2.3	50% subclinical	Mean incubation 4.5d	missed: undetectable	0.335134287731978	1
2.4	50% subclinical	Mean incubation 4.5d	detected: departure fever screen	0	0.0586956847035959
2.4	50% subclinical	Mean incubation 4.5d	detected: departure risk screen	0.0586956847035959	0.105760900468416
2.4	50% subclinical	Mean incubation 4.5d	detected: arrival fever screen	0.105760900468416	0.185679041896054
2.4	50% subclinical	Mean incubation 4.5d	detected: arrival risk screen	0.185679041896054	0.217823290242262
2.4	50% subclinical	Mean incubation 4.5d	missed: had both	0.217823290242262	0.221879286141785
2.4	50% subclinical	Mean incubation 4.5d	missed: had fever	0.221879286141785	0.250721923649504
2.4	50% subclinical	Mean incubation 4.5d	missed: had risk awareness	0.250721923649504	0.343098672788606
2.4	50% subclinical	Mean incubation 4.5d	missed: undetectable	0.343098672788606	1
2.5	50% subclinical	Mean incubation 4.5d	detected: departure fever screen	0	0.0647621823156459
2.5	50% subclinical	Mean incubation 4.5d	detected: departure risk screen	0.0647621823156459	0.111524073199864
2.5	50% subclinical	Mean incubation 4.5d	detected: arrival fever screen	0.111524073199864	0.19402414824598
2.5	50% subclinical	Mean incubation 4.5d	detected: arrival risk screen	0.19402414824598	0.225838984499428
2.5	50% subclinical	Mean incubation 4.5d	missed: had both	0.225838984499428	0.230026018383348
2.5	50% subclinical	Mean incubation 4.5d	missed: had fever	0.230026018383348	0.259800481557886
2.5	50% subclinical	Mean incubation 4.5d	missed: had risk awareness	0.259800481557886	0.351057956434311
2.5	50% subclinical	Mean incubation 4.5d	missed: undetectable	0.351057956434311	1
2.6	50% subclinical	Mean incubation 4.5d	detected: departure fever screen	0	0.0710205042974799
2.6	50% subclinical	Mean incubation 4.5d	detected: departure risk screen	0.0710205042974799	0.117469479082606
2.6	50% subclinical	Mean incubation 4.5d	detected: arrival fever screen	0.117469479082606	0.202403035359934
2.6	50% subclinical	Mean incubation 4.5d	detected: arrival risk screen	0.202403035359934	0.23388712606941
2.6	50% subclinical	Mean incubation 4.5d	missed: had both	0.23388712606941	0.238197663700027
2.6	50% subclinical	Mean incubation 4.5d	missed: had fever	0.238197663700027	0.268850375739965
2.6	50% subclinical	Mean incubation 4.5d	missed: had risk awareness	0.268850375739965	0.358992110237777
2.6	50% subclinical	Mean incubation 4.5d	missed: undetectable	0.358992110237777	1
2.7	50% subclinical	Mean incubation 4.5d	detected: departure fever screen	0	0.0774469811372891
2.7	50% subclinical	Mean incubation 4.5d	detected: departure risk screen	0.0774469811372891	0.123574632080425
2.7	50% subclinical	Mean incubation 4.5d	detected: arrival fever screen	0.123574632080425	0.210793385149563
2.7	50% subclinical	Mean incubation 4.5d	detected: arrival risk screen	0.210793385149563	0.241946277841028
2.7	50% subclinical	Mean incubation 4.5d	missed: had both	0.241946277841028	0.246372793504311
2.7	50% subclinical	Mean incubation 4.5d	missed: had fever	0.246372793504311	0.277850238220993
2.7	50% subclinical	Mean incubation 4.5d	missed: had risk awareness	0.277850238220993	0.366882400632103
2.7	50% subclinical	Mean incubation 4.5d	missed: undetectable	0.366882400632103	1
2.8	50% subclinical	Mean incubation 4.5d	detected: departure fever screen	0	0.0840179839792225
2.8	50% subclinical	Mean incubation 4.5d	detected: departure risk screen	0.0840179839792225	0.129817084780261
2.8	50% subclinical	Mean incubation 4.5d	detected: arrival fever screen	0.129817084780261	0.219173987884472
2.8	50% subclinical	Mean incubation 4.5d	detected: arrival risk screen	0.219173987884472	0.249996067310085
2.8	50% subclinical	Mean incubation 4.5d	missed: had both	0.249996067310085	0.254531098106728
2.8	50% subclinical	Mean incubation 4.5d	missed: had fever	0.254531098106728	0.286780205993962
2.8	50% subclinical	Mean incubation 4.5d	missed: had risk awareness	0.286780205993962	0.374711413474158
2.8	50% subclinical	Mean incubation 4.5d	missed: undetectable	0.374711413474158	1
2.9	50% subclinical	Mean incubation 4.5d	detected: departure fever screen	0	0.0907101485826905
2.9	50% subclinical	Mean incubation 4.5d	detected: departure risk screen	0.0907101485826905	0.136174641153556
2.9	50% subclinical	Mean incubation 4.5d	detected: arrival fever screen	0.136174641153556	0.2275248139677
2.9	50% subclinical	Mean incubation 4.5d	detected: arrival risk screen	0.2275248139677	0.258017255521607
2.9	50% subclinical	Mean incubation 4.5d	missed: had both	0.258017255521607	0.262653448502776
2.9	50% subclinical	Mean incubation 4.5d	missed: had fever	0.262653448502776	0.295621931924422
2.9	50% subclinical	Mean incubation 4.5d	missed: had risk awareness	0.295621931924422	0.382463063604972
2.9	50% subclinical	Mean incubation 4.5d	missed: undetectable	0.382463063604972	1
3	50% subclinical	Mean incubation 4.5d	detected: departure fever screen	0	0.0975005695378811
3	50% subclinical	Mean incubation 4.5d	detected: departure risk screen	0.0975005695378811	0.142625541060987
3	50% subclinical	Mean incubation 4.5d	detected: arrival fever screen	0.142625541060987	0.235827066344187
3	50% subclinical	Mean incubation 4.5d	detected: arrival risk screen	0.235827066344187	0.265991787409548
3	50% subclinical	Mean incubation 4.5d	missed: had both	0.265991787409548	0.270721940008507
3	50% subclinical	Mean incubation 4.5d	missed: had fever	0.270721940008507	0.304358580712218
3	50% subclinical	Mean incubation 4.5d	missed: had risk awareness	0.304358580712218	0.390122591309342
3	50% subclinical	Mean incubation 4.5d	missed: undetectable	0.390122591309342	1
3.1	50% subclinical	Mean incubation 4.5d	detected: departure fever screen	0	0.104366966274538
3.1	50% subclinical	Mean incubation 4.5d	detected: departure risk screen	0.104366966274538	0.149148617960811
3.1	50% subclinical	Mean incubation 4.5d	detected: arrival fever screen	0.149148617960811	0.244063215455928
3.1	50% subclinical	Mean incubation 4.5d	detected: arrival risk screen	0.244063215455928	0.273902825372142
3.1	50% subclinical	Mean incubation 4.5d	missed: had both	0.273902825372142	0.278719919605916
3.1	50% subclinical	Mean incubation 4.5d	missed: had fever	0.278719919605916	0.312974811934981
3.1	50% subclinical	Mean incubation 4.5d	missed: had risk awareness	0.312974811934981	0.397676547449847
3.1	50% subclinical	Mean incubation 4.5d	missed: undetectable	0.397676547449847	1
3.2	50% subclinical	Mean incubation 4.5d	detected: departure fever screen	0	0.111287822615815
3.2	50% subclinical	Mean incubation 4.5d	detected: departure risk screen	0.111287822615815	0.155723431485024
3.2	50% subclinical	Mean incubation 4.5d	detected: arrival fever screen	0.155723431485024	0.252217018612418
3.2	50% subclinical	Mean incubation 4.5d	detected: arrival risk screen	0.252217018612418	0.281734767877717
3.2	50% subclinical	Mean incubation 4.5d	missed: had both	0.281734767877717	0.286631998803356
3.2	50% subclinical	Mean incubation 4.5d	missed: had fever	0.286631998803356	0.32145675205234
3.2	50% subclinical	Mean incubation 4.5d	missed: had risk awareness	0.32145675205234	0.4051127689226
3.2	50% subclinical	Mean incubation 4.5d	missed: undetectable	0.4051127689226	1
3.3	50% subclinical	Mean incubation 4.5d	detected: departure fever screen	0	0.118242501765481
3.3	50% subclinical	Mean incubation 4.5d	detected: departure risk screen	0.118242501765481	0.162330376677207
3.3	50% subclinical	Mean incubation 4.5d	detected: arrival fever screen	0.162330376677207	0.260273525576045
3.3	50% subclinical	Mean incubation 4.5d	detected: arrival risk screen	0.260273525576045	0.289473254829622
3.3	50% subclinical	Mean incubation 4.5d	missed: had both	0.289473254829622	0.294444053739901
3.3	50% subclinical	Mean incubation 4.5d	missed: had fever	0.294444053739901	0.329791957101888
3.3	50% subclinical	Mean incubation 4.5d	missed: had risk awareness	0.329791957101888	0.41242034595234
3.3	50% subclinical	Mean incubation 4.5d	missed: undetectable	0.41242034595234	1
3.4	50% subclinical	Mean incubation 4.5d	detected: departure fever screen	0	0.12521133869003
3.4	50% subclinical	Mean incubation 4.5d	detected: departure risk screen	0.12521133869003	0.168950771755529
3.4	50% subclinical	Mean incubation 4.5d	detected: arrival fever screen	0.168950771755529	0.268219072075776
3.4	50% subclinical	Mean incubation 4.5d	detected: arrival risk screen	0.268219072075776	0.297105161335943
3.4	50% subclinical	Mean incubation 4.5d	missed: had both	0.297105161335943	0.302143214171745
3.4	50% subclinical	Mean incubation 4.5d	missed: had fever	0.302143214171745	0.337969367670782
3.4	50% subclinical	Mean incubation 4.5d	missed: had risk awareness	0.337969367670782	0.41958958261548
3.4	50% subclinical	Mean incubation 4.5d	missed: undetectable	0.41958958261548	1
3.5	50% subclinical	Mean incubation 4.5d	detected: departure fever screen	0	0.132175711880022
3.5	50% subclinical	Mean incubation 4.5d	detected: departure risk screen	0.132175711880022	0.175566926286021
3.5	50% subclinical	Mean incubation 4.5d	detected: arrival fever screen	0.175566926286021	0.276041262863876
3.5	50% subclinical	Mean incubation 4.5d	detected: arrival risk screen	0.276041262863876	0.304618581435038
3.5	50% subclinical	Mean incubation 4.5d	missed: had both	0.304618581435038	0.309717842877899
3.5	50% subclinical	Mean incubation 4.5d	missed: had fever	0.309717842877899	0.345979257582689
3.5	50% subclinical	Mean incubation 4.5d	missed: had risk awareness	0.345979257582689	0.426611951853316
3.5	50% subclinical	Mean incubation 4.5d	missed: undetectable	0.426611951853316	1
3.6	50% subclinical	Mean incubation 4.5d	detected: departure fever screen	0	0.139118096458055
3.6	50% subclinical	Mean incubation 4.5d	detected: departure risk screen	0.139118096458055	0.182162191635152
3.6	50% subclinical	Mean incubation 4.5d	detected: arrival fever screen	0.182162191635152	0.283728945823913
3.6	50% subclinical	Mean incubation 4.5d	detected: arrival risk screen	0.283728945823913	0.312002803225601
3.6	50% subclinical	Mean incubation 4.5d	missed: had both	0.312002803225601	0.317157506915632
3.6	50% subclinical	Mean incubation 4.5d	missed: had fever	0.317157506915632	0.353813177600297
3.6	50% subclinical	Mean incubation 4.5d	missed: had risk awareness	0.353813177600297	0.433480046115329
3.6	50% subclinical	Mean incubation 4.5d	missed: undetectable	0.433480046115329	1
3.7	50% subclinical	Mean incubation 4.5d	detected: departure fever screen	0	0.14602210055309
3.7	50% subclinical	Mean incubation 4.5d	detected: departure risk screen	0.14602210055309	0.188720995525436
3.7	50% subclinical	Mean incubation 4.5d	detected: arrival fever screen	0.188720995525436	0.291272178527419
3.7	50% subclinical	Mean incubation 4.5d	detected: arrival risk screen	0.291272178527419	0.319248276743442
3.7	50% subclinical	Mean incubation 4.5d	missed: had both	0.319248276743442	0.324452942046174
3.7	50% subclinical	Mean incubation 4.5d	missed: had fever	0.324452942046174	0.361463895310048
3.7	50% subclinical	Mean incubation 4.5d	missed: had risk awareness	0.361463895310048	0.440187524655384
3.7	50% subclinical	Mean incubation 4.5d	missed: undetectable	0.440187524655384	1
3.8	50% subclinical	Mean incubation 4.5d	detected: departure fever screen	0	0.152872486789888
3.8	50% subclinical	Mean incubation 4.5d	detected: departure risk screen	0.152872486789888	0.195228862450394
3.8	50% subclinical	Mean incubation 4.5d	detected: arrival fever screen	0.195228862450394	0.298662188523932
3.8	50% subclinical	Mean incubation 4.5d	detected: arrival risk screen	0.298662188523932	0.32634657581904
3.8	50% subclinical	Mean incubation 4.5d	missed: had both	0.32634657581904	0.331596011540817
3.8	50% subclinical	Mean incubation 4.5d	missed: had fever	0.331596011540817	0.368925332229011
3.8	50% subclinical	Mean incubation 4.5d	missed: had risk awareness	0.368925332229011	0.446729058392558
3.8	50% subclinical	Mean incubation 4.5d	missed: undetectable	0.446729058392558	1
3.9	50% subclinical	Mean incubation 4.5d	detected: departure fever screen	0	0.159655180654351
3.9	50% subclinical	Mean incubation 4.5d	detected: departure risk screen	0.159655180654351	0.201672421621633
3.9	50% subclinical	Mean incubation 4.5d	detected: arrival fever screen	0.201672421621633	0.305891328537186
3.9	50% subclinical	Mean incubation 4.5d	detected: arrival risk screen	0.305891328537186	0.333290355042298
3.9	50% subclinical	Mean incubation 4.5d	missed: had both	0.333290355042298	0.338579660468463
3.9	50% subclinical	Mean incubation 4.5d	missed: had fever	0.338579660468463	0.376192499054527
3.9	50% subclinical	Mean incubation 4.5d	missed: had risk awareness	0.376192499054527	0.453100273143695
3.9	50% subclinical	Mean incubation 4.5d	missed: undetectable	0.453100273143695	1
4	50% subclinical	Mean incubation 4.5d	detected: departure fever screen	0	0.166357267395674
4	50% subclinical	Mean incubation 4.5d	detected: departure risk screen	0.166357267395674	0.20803940402589
4	50% subclinical	Mean incubation 4.5d	detected: arrival fever screen	0.20803940402589	0.312953027630452
4	50% subclinical	Mean incubation 4.5d	detected: arrival risk screen	0.312953027630452	0.340073302855566
4	50% subclinical	Mean incubation 4.5d	missed: had both	0.340073302855566	0.345397866459557
4	50% subclinical	Mean incubation 4.5d	missed: had fever	0.345397866459557	0.383261429865714
4	50% subclinical	Mean incubation 4.5d	missed: had risk awareness	0.383261429865714	0.459297691937065
4	50% subclinical	Mean incubation 4.5d	missed: undetectable	0.459297691937065	1
4.1	50% subclinical	Mean incubation 4.5d	detected: departure fever screen	0	0.172966979018616
4.1	50% subclinical	Mean incubation 4.5d	detected: departure risk screen	0.172966979018616	0.214318630067685
4.1	50% subclinical	Mean incubation 4.5d	detected: arrival fever screen	0.214318630067685	0.319841739297901
4.1	50% subclinical	Mean incubation 4.5d	detected: arrival risk screen	0.319841739297901	0.346690091694037
4.1	50% subclinical	Mean incubation 4.5d	missed: had both	0.346690091694037	0.35204558783918
4.1	50% subclinical	Mean incubation 4.5d	missed: had fever	0.35204558783918	0.390129115982416
4.1	50% subclinical	Mean incubation 4.5d	missed: had risk awareness	0.390129115982416	0.465318677025679
4.1	50% subclinical	Mean incubation 4.5d	missed: undetectable	0.465318677025679	1
4.2	50% subclinical	Mean incubation 4.5d	detected: departure fever screen	0	0.179473672807275
4.2	50% subclinical	Mean incubation 4.5d	detected: departure risk screen	0.179473672807275	0.220499989166911
4.2	50% subclinical	Mean incubation 4.5d	detected: arrival fever screen	0.220499989166911	0.326552887337344
4.2	50% subclinical	Mean incubation 4.5d	detected: arrival risk screen	0.326552887337344	0.353136325995081
4.2	50% subclinical	Mean incubation 4.5d	missed: had both	0.353136325995081	0.358518709924783
4.2	50% subclinical	Mean incubation 4.5d	missed: had fever	0.358518709924783	0.396793440091556
4.2	50% subclinical	Mean incubation 4.5d	missed: had risk awareness	0.396793440091556	0.471161372135063
4.2	50% subclinical	Mean incubation 4.5d	missed: undetectable	0.471161372135063	1
4.3	50% subclinical	Mean incubation 4.5d	detected: departure fever screen	0	0.185867802708298
4.3	50% subclinical	Mean incubation 4.5d	detected: departure risk screen	0.185867802708298	0.226574412572883
4.3	50% subclinical	Mean incubation 4.5d	detected: arrival fever screen	0.226574412572883	0.333082810263397
4.3	50% subclinical	Mean incubation 4.5d	detected: arrival risk screen	0.333082810263397	0.359408488805631
4.3	50% subclinical	Mean incubation 4.5d	missed: had both	0.359408488805631	0.36481399019218
4.3	50% subclinical	Mean incubation 4.5d	missed: had fever	0.36481399019218	0.403253111163193
4.3	50% subclinical	Mean incubation 4.5d	missed: had risk awareness	0.403253111163193	0.476824645403347
4.3	50% subclinical	Mean incubation 4.5d	missed: undetectable	0.476824645403347	1
4.4	50% subclinical	Mean incubation 4.5d	detected: departure fever screen	0	0.192140884788545
4.4	50% subclinical	Mean incubation 4.5d	detected: departure risk screen	0.192140884788545	0.232533840549118
4.4	50% subclinical	Mean incubation 4.5d	detected: arrival fever screen	0.232533840549118	0.339428704929628
4.4	50% subclinical	Mean incubation 4.5d	detected: arrival risk screen	0.339428704929628	0.365503887629774
4.4	50% subclinical	Mean incubation 4.5d	missed: had both	0.365503887629774	0.370929002927281
4.4	50% subclinical	Mean incubation 4.5d	missed: had fever	0.370929002927281	0.409507600598443
4.4	50% subclinical	Mean incubation 4.5d	missed: had risk awareness	0.409507600598443	0.482308033401374
4.4	50% subclinical	Mean incubation 4.5d	missed: undetectable	0.482308033401374	1
4.5	50% subclinical	Mean incubation 4.5d	detected: departure fever screen	0	0.198285457871652
4.5	50% subclinical	Mean incubation 4.5d	detected: departure risk screen	0.198285457871652	0.238371184978069
4.5	50% subclinical	Mean incubation 4.5d	detected: arrival fever screen	0.238371184978069	0.34558856994374
4.5	50% subclinical	Mean incubation 4.5d	detected: arrival risk screen	0.34558856994374	0.37142060007754
4.5	50% subclinical	Mean incubation 4.5d	missed: had both	0.37142060007754	0.376862083900986
4.5	50% subclinical	Mean incubation 4.5d	missed: had fever	0.376862083900986	0.415557079978822
4.5	50% subclinical	Mean incubation 4.5d	missed: had risk awareness	0.415557079978822	0.487611686556775
4.5	50% subclinical	Mean incubation 4.5d	missed: undetectable	0.487611686556775	1
4.6	50% subclinical	Mean incubation 4.5d	detected: departure fever screen	0	0.204295040350913
4.6	50% subclinical	Mean incubation 4.5d	detected: departure risk screen	0.204295040350913	0.244080288333367
4.6	50% subclinical	Mean incubation 4.5d	detected: arrival fever screen	0.244080288333367	0.3515611493815
4.6	50% subclinical	Mean incubation 4.5d	detected: arrival risk screen	0.3515611493815	0.377157419800651
4.6	50% subclinical	Mean incubation 4.5d	missed: had both	0.377157419800651	0.382612275530538
4.6	50% subclinical	Mean incubation 4.5d	missed: had fever	0.382612275530538	0.421402360720841
4.6	50% subclinical	Mean incubation 4.5d	missed: had risk awareness	0.421402360720841	0.492736316248409
4.6	50% subclinical	Mean incubation 4.5d	missed: undetectable	0.492736316248409	1
4.7	50% subclinical	Mean incubation 4.5d	detected: departure fever screen	0	0.210164084073461
4.7	50% subclinical	Mean incubation 4.5d	detected: departure risk screen	0.210164084073461	0.249655879869788
4.7	50% subclinical	Mean incubation 4.5d	detected: arrival fever screen	0.249655879869788	0.357345877232939
4.7	50% subclinical	Mean incubation 4.5d	detected: arrival risk screen	0.357345877232939	0.382713803131638
4.7	50% subclinical	Mean incubation 4.5d	missed: had both	0.382713803131638	0.388179272922625
4.7	50% subclinical	Mean incubation 4.5d	missed: had fever	0.388179272922625	0.427044835880755
4.7	50% subclinical	Mean incubation 4.5d	missed: had risk awareness	0.427044835880755	0.497683143785867
4.7	50% subclinical	Mean incubation 4.5d	missed: undetectable	0.497683143785867	1
4.8	50% subclinical	Mean incubation 4.5d	detected: departure fever screen	0	0.215887926093488
4.8	50% subclinical	Mean incubation 4.5d	detected: departure risk screen	0.215887926093488	0.255093529788814
4.8	50% subclinical	Mean incubation 4.5d	detected: arrival fever screen	0.255093529788814	0.362942822948248
4.8	50% subclinical	Mean incubation 4.5d	detected: arrival risk screen	0.362942822948248	0.388089816779238
4.8	50% subclinical	Mean incubation 4.5d	missed: had both	0.388089816779238	0.393563371131314
4.8	50% subclinical	Mean incubation 4.5d	missed: had fever	0.393563371131314	0.432486424301636
4.8	50% subclinical	Mean incubation 4.5d	missed: had risk awareness	0.432486424301636	0.502453851442531
4.8	50% subclinical	Mean incubation 4.5d	missed: undetectable	0.502453851442531	1
4.9	50% subclinical	Mean incubation 4.5d	detected: departure fever screen	0	0.221462739000733
4.9	50% subclinical	Mean incubation 4.5d	detected: departure risk screen	0.221462739000733	0.260389602050697
4.9	50% subclinical	Mean incubation 4.5d	detected: arrival fever screen	0.260389602050697	0.36835263839056
4.9	50% subclinical	Mean incubation 4.5d	detected: arrival risk screen	0.36835263839056	0.393286086875144
4.9	50% subclinical	Mean incubation 4.5d	missed: had both	0.393286086875144	0.39876541390743
4.9	50% subclinical	Mean incubation 4.5d	missed: had fever	0.39876541390743	0.437729517248133
4.9	50% subclinical	Mean incubation 4.5d	missed: had risk awareness	0.437729517248133	0.507050535669596
4.9	50% subclinical	Mean incubation 4.5d	missed: undetectable	0.507050535669596	1
5	50% subclinical	Mean incubation 4.5d	detected: departure fever screen	0	0.226885480444932
5	50% subclinical	Mean incubation 4.5d	detected: departure risk screen	0.226885480444932	0.265541206422685
5	50% subclinical	Mean incubation 4.5d	detected: arrival fever screen	0.265541206422685	0.373576506448294
5	50% subclinical	Mean incubation 4.5d	detected: arrival risk screen	0.373576506448294	0.398303749614808
5	50% subclinical	Mean incubation 4.5d	missed: had both	0.398303749614808	0.40378674416498
5	50% subclinical	Mean incubation 4.5d	missed: had fever	0.40378674416498	0.442776927632869
5	50% subclinical	Mean incubation 4.5d	missed: had risk awareness	0.442776927632869	0.511475662582241
5	50% subclinical	Mean incubation 4.5d	missed: undetectable	0.511475662582241	1
5.1	50% subclinical	Mean incubation 4.5d	detected: departure fever screen	0	0.232153842397469
5.1	50% subclinical	Mean incubation 4.5d	detected: departure risk screen	0.232153842397469	0.270546150277596
5.1	50% subclinical	Mean incubation 4.5d	detected: arrival fever screen	0.270546150277596	0.378616091510601
5.1	50% subclinical	Mean incubation 4.5d	detected: arrival risk screen	0.378616091510601	0.403144403687814
5.1	50% subclinical	Mean incubation 4.5d	missed: had both	0.403144403687814	0.408629156344377
5.1	50% subclinical	Mean incubation 4.5d	missed: had fever	0.408629156344377	0.447631841902153
5.1	50% subclinical	Mean incubation 4.5d	missed: had risk awareness	0.447631841902153	0.51573202577723
5.1	50% subclinical	Mean incubation 4.5d	missed: undetectable	0.51573202577723	1
5.2	50% subclinical	Mean incubation 4.5d	detected: departure fever screen	0	0.23726620061818
5.2	50% subclinical	Mean incubation 4.5d	detected: departure risk screen	0.23726620061818	0.275402890587271
5.2	50% subclinical	Mean incubation 4.5d	detected: arrival fever screen	0.275402890587271	0.383473491965514
5.2	50% subclinical	Mean incubation 4.5d	detected: arrival risk screen	0.383473491965514	0.407810064651085
5.2	50% subclinical	Mean incubation 4.5d	missed: had both	0.407810064651085	0.413294850811259
5.2	50% subclinical	Mean incubation 4.5d	missed: had fever	0.413294850811259	0.452297774616941
5.2	50% subclinical	Mean incubation 4.5d	missed: had risk awareness	0.452297774616941	0.519822706513482
5.2	50% subclinical	Mean incubation 4.5d	missed: undetectable	0.519822706513482	1
5.3	50% subclinical	Mean incubation 4.5d	detected: departure fever screen	0	0.242221564727929
5.3	50% subclinical	Mean incubation 4.5d	detected: departure risk screen	0.242221564727929	0.280110486491532
5.3	50% subclinical	Mean incubation 4.5d	detected: arrival fever screen	0.280110486491532	0.388151194841172
5.3	50% subclinical	Mean incubation 4.5d	detected: arrival risk screen	0.388151194841172	0.4123031213606
5.3	50% subclinical	Mean incubation 4.5d	missed: had both	0.4123031213606	0.417786390393382
5.3	50% subclinical	Mean incubation 4.5d	missed: had fever	0.417786390393382	0.456778525737613
5.3	50% subclinical	Mean incubation 4.5d	missed: had risk awareness	0.456778525737613	0.523751036263113
5.3	50% subclinical	Mean incubation 4.5d	missed: undetectable	0.523751036263113	1
5.4	50% subclinical	Mean incubation 4.5d	detected: departure fever screen	0	0.247019529226203
5.4	50% subclinical	Mean incubation 4.5d	detected: departure risk screen	0.247019529226203	0.284668552764892
5.4	50% subclinical	Mean incubation 4.5d	detected: arrival fever screen	0.284668552764892	0.392652032675904
5.4	50% subclinical	Mean incubation 4.5d	detected: arrival risk screen	0.392652032675904	0.41662629454396
5.4	50% subclinical	Mean incubation 4.5d	missed: had both	0.41662629454396	0.42210665912591
5.4	50% subclinical	Mean incubation 4.5d	missed: had fever	0.42210665912591	0.461078140597554
5.4	50% subclinical	Mean incubation 4.5d	missed: had risk awareness	0.461078140597554	0.527520561619773
5.4	50% subclinical	Mean incubation 4.5d	missed: undetectable	0.527520561619773	1
5.5	50% subclinical	Mean incubation 4.5d	detected: departure fever screen	0	0.251660225737178
5.5	50% subclinical	Mean incubation 4.5d	detected: departure risk screen	0.251660225737178	0.289077214450319
5.5	50% subclinical	Mean incubation 4.5d	detected: arrival fever screen	0.289077214450319	0.396979142672402
5.5	50% subclinical	Mean incubation 4.5d	detected: arrival risk screen	0.396979142672402	0.420782597566912
5.5	50% subclinical	Mean incubation 4.5d	missed: had both	0.420782597566912	0.426258823247356
5.5	50% subclinical	Mean incubation 4.5d	missed: had fever	0.426258823247356	0.465200872530514
5.5	50% subclinical	Mean incubation 4.5d	missed: had risk awareness	0.465200872530514	0.531135011533601
5.5	50% subclinical	Mean incubation 4.5d	missed: undetectable	0.531135011533601	1
5.6	50% subclinical	Mean incubation 4.5d	detected: departure fever screen	0	0.256144276717357
5.6	50% subclinical	Mean incubation 4.5d	detected: departure risk screen	0.256144276717357	0.29333706288149
5.6	50% subclinical	Mean incubation 4.5d	detected: arrival fever screen	0.29333706288149	0.401135928164655
5.6	50% subclinical	Mean incubation 4.5d	detected: arrival risk screen	0.401135928164655	0.424775299421313
5.6	50% subclinical	Mean incubation 4.5d	missed: had both	0.424775299421313	0.43024629446388
5.6	50% subclinical	Mean incubation 4.5d	missed: had fever	0.43024629446388	0.469151148099909
5.6	50% subclinical	Mean incubation 4.5d	missed: had risk awareness	0.469151148099909	0.534598266827318
5.6	50% subclinical	Mean incubation 4.5d	missed: undetectable	0.534598266827318	1
5.7	50% subclinical	Mean incubation 4.5d	detected: departure fever screen	0	0.260472750812634
5.7	50% subclinical	Mean incubation 4.5d	detected: departure risk screen	0.260472750812634	0.297449113272002
5.7	50% subclinical	Mean incubation 4.5d	detected: arrival fever screen	0.297449113272002	0.405126022403196
5.7	50% subclinical	Mean incubation 4.5d	detected: arrival risk screen	0.405126022403196	0.428607889939912
5.7	50% subclinical	Mean incubation 4.5d	missed: had both	0.428607889939912	0.434072695478526
5.7	50% subclinical	Mean incubation 4.5d	missed: had fever	0.434072695478526	0.47293353486422
5.7	50% subclinical	Mean incubation 4.5d	missed: had risk awareness	0.47293353486422	0.537914331935754
5.7	50% subclinical	Mean incubation 4.5d	missed: undetectable	0.537914331935754	1
5.8	50% subclinical	Mean incubation 4.5d	detected: departure fever screen	0	0.264647120012214
5.8	50% subclinical	Mean incubation 4.5d	detected: departure risk screen	0.264647120012214	0.301414764011604
5.8	50% subclinical	Mean incubation 4.5d	detected: arrival fever screen	0.301414764011604	0.408953254644406
5.8	50% subclinical	Mean incubation 4.5d	detected: arrival risk screen	0.408953254644406	0.432284047224232
5.8	50% subclinical	Mean incubation 4.5d	missed: had both	0.432284047224232	0.437741827763866
5.8	50% subclinical	Mean incubation 4.5d	missed: had fever	0.437741827763866	0.476552711601269
5.8	50% subclinical	Mean incubation 4.5d	missed: had risk awareness	0.476552711601269	0.541087308801112
5.8	50% subclinical	Mean incubation 4.5d	missed: undetectable	0.541087308801112	1
5.9	50% subclinical	Mean incubation 4.5d	detected: departure fever screen	0	0.268669218710896
5.9	50% subclinical	Mean incubation 4.5d	detected: departure risk screen	0.268669218710896	0.305235757775351
5.9	50% subclinical	Mean incubation 4.5d	detected: arrival fever screen	0.305235757775351	0.412621618512712
5.9	50% subclinical	Mean incubation 4.5d	detected: arrival risk screen	0.412621618512712	0.435807607255631
5.9	50% subclinical	Mean incubation 4.5d	missed: had both	0.435807607255631	0.441257641541174
5.9	50% subclinical	Mean incubation 4.5d	missed: had fever	0.441257641541174	0.480013440905033
5.9	50% subclinical	Mean incubation 4.5d	missed: had risk awareness	0.480013440905033	0.544121372848248
5.9	50% subclinical	Mean incubation 4.5d	missed: undetectable	0.544121372848248	1
6	50% subclinical	Mean incubation 4.5d	detected: departure fever screen	0	0.272541204759461
6	50% subclinical	Mean incubation 4.5d	detected: departure risk screen	0.272541204759461	0.308914144521488
6	50% subclinical	Mean incubation 4.5d	detected: arrival fever screen	0.308914144521488	0.416135242590357
6	50% subclinical	Mean incubation 4.5d	detected: arrival risk screen	0.416135242590357	0.439182535646001
6	50% subclinical	Mean incubation 4.5d	missed: had both	0.439182535646001	0.444624207916414
6	50% subclinical	Mean incubation 4.5d	missed: had fever	0.444624207916414	0.483320544061569
6	50% subclinical	Mean incubation 4.5d	missed: had risk awareness	0.483320544061569	0.547020750958088
6	50% subclinical	Mean incubation 4.5d	missed: undetectable	0.547020750958088	1
6.1	50% subclinical	Mean incubation 4.5d	detected: departure fever screen	0	0.276265522555076
6.1	50% subclinical	Mean incubation 4.5d	detected: departure risk screen	0.276265522555076	0.312452246427322
6.1	50% subclinical	Mean incubation 4.5d	detected: arrival fever screen	0.312452246427322	0.419498363177559
6.1	50% subclinical	Mean incubation 4.5d	detected: arrival risk screen	0.419498363177559	0.442412901473182
6.1	50% subclinical	Mean incubation 4.5d	missed: had both	0.442412901473182	0.447845693112761
6.1	50% subclinical	Mean incubation 4.5d	missed: had fever	0.447845693112761	0.486478878105328
6.1	50% subclinical	Mean incubation 4.5d	missed: had risk awareness	0.486478878105328	0.549789701352616
6.1	50% subclinical	Mean incubation 4.5d	missed: undetectable	0.549789701352616	1
6.2	50% subclinical	Mean incubation 4.5d	detected: departure fever screen	0	0.279844868199297
6.2	50% subclinical	Mean incubation 4.5d	detected: departure risk screen	0.279844868199297	0.315852624789332
6.2	50% subclinical	Mean incubation 4.5d	detected: arrival fever screen	0.315852624789332	0.422715299156285
6.2	50% subclinical	Mean incubation 4.5d	detected: arrival risk screen	0.422715299156285	0.445502853136958
6.2	50% subclinical	Mean incubation 4.5d	missed: had both	0.445502853136958	0.45092633473077
6.2	50% subclinical	Mean incubation 4.5d	missed: had fever	0.45092633473077	0.48949331495343
6.2	50% subclinical	Mean incubation 4.5d	missed: had risk awareness	0.48949331495343	0.552432495301637
6.2	50% subclinical	Mean incubation 4.5d	missed: undetectable	0.552432495301637	1
6.3	50% subclinical	Mean incubation 4.5d	detected: departure fever screen	0	0.283282156730224
6.3	50% subclinical	Mean incubation 4.5d	detected: departure risk screen	0.283282156730224	0.319118048893713
6.3	50% subclinical	Mean incubation 4.5d	detected: arrival fever screen	0.319118048893713	0.425790428883161
6.3	50% subclinical	Mean incubation 4.5d	detected: arrival risk screen	0.425790428883161	0.448456596164089
6.3	50% subclinical	Mean incubation 4.5d	missed: had both	0.448456596164089	0.453870419960546
6.3	50% subclinical	Mean incubation 4.5d	missed: had fever	0.453870419960546	0.492368722513128
6.3	50% subclinical	Mean incubation 4.5d	missed: had risk awareness	0.492368722513128	0.554953400559455
6.3	50% subclinical	Mean incubation 4.5d	missed: undetectable	0.554953400559455	1
6.4	50% subclinical	Mean incubation 4.5d	detected: departure fever screen	0	0.286580491417301
6.4	50% subclinical	Mean incubation 4.5d	detected: departure risk screen	0.286580491417301	0.322251466846436
6.4	50% subclinical	Mean incubation 4.5d	detected: arrival fever screen	0.322251466846436	0.428728169031019
6.4	50% subclinical	Mean incubation 4.5d	detected: arrival risk screen	0.428728169031019	0.451278372885058
6.4	50% subclinical	Mean incubation 4.5d	missed: had both	0.451278372885058	0.456682265665103
6.4	50% subclinical	Mean incubation 4.5d	missed: had fever	0.456682265665103	0.495109947656531
6.4	50% subclinical	Mean incubation 4.5d	missed: had risk awareness	0.495109947656531	0.557356666438603
6.4	50% subclinical	Mean incubation 4.5d	missed: undetectable	0.557356666438603	1
6.5	50% subclinical	Mean incubation 4.5d	detected: departure fever screen	0	0.289743135091901
6.5	50% subclinical	Mean incubation 4.5d	detected: departure risk screen	0.289743135091901	0.325255978337306
6.5	50% subclinical	Mean incubation 4.5d	detected: arrival fever screen	0.325255978337306	0.431532955294167
6.5	50% subclinical	Mean incubation 4.5d	detected: arrival risk screen	0.431532955294167	0.453972443900977
6.5	50% subclinical	Mean incubation 4.5d	missed: had both	0.453972443900977	0.459366200250291
6.5	50% subclinical	Mean incubation 4.5d	missed: had fever	0.459366200250291	0.497721800956527
6.5	50% subclinical	Mean incubation 4.5d	missed: had risk awareness	0.497721800956527	0.55964651042764
6.5	50% subclinical	Mean incubation 4.5d	missed: undetectable	0.55964651042764	1
6.6	50% subclinical	Mean incubation 4.5d	detected: departure fever screen	0	0.292773483473903
6.6	50% subclinical	Mean incubation 4.5d	detected: departure risk screen	0.292773483473903	0.328134809300208
6.6	50% subclinical	Mean incubation 4.5d	detected: arrival fever screen	0.328134809300208	0.434209224869278
6.6	50% subclinical	Mean incubation 4.5d	detected: arrival risk screen	0.434209224869278	0.456543071256017
6.6	50% subclinical	Mean incubation 4.5d	missed: had both	0.456543071256017	0.461926547234147
6.6	50% subclinical	Mean incubation 4.5d	missed: had fever	0.461926547234147	0.500209043078623
6.6	50% subclinical	Mean incubation 4.5d	missed: had risk awareness	0.500209043078623	0.561827106260711
6.6	50% subclinical	Mean incubation 4.5d	missed: undetectable	0.561827106260711	1
6.7	50% subclinical	Mean incubation 4.5d	detected: departure fever screen	0	0.295675040443785
6.7	50% subclinical	Mean incubation 4.5d	detected: departure risk screen	0.295675040443785	0.330891288421596
6.7	50% subclinical	Mean incubation 4.5d	detected: arrival fever screen	0.330891288421596	0.43676140062187
6.7	50% subclinical	Mean incubation 4.5d	detected: arrival risk screen	0.43676140062187	0.458994503228901
6.7	50% subclinical	Mean incubation 4.5d	missed: had both	0.458994503228901	0.464367610427036
6.7	50% subclinical	Mean incubation 4.5d	missed: had fever	0.464367610427036	0.502576372724879
6.7	50% subclinical	Mean incubation 4.5d	missed: had risk awareness	0.502576372724879	0.563902573347839
6.7	50% subclinical	Mean incubation 4.5d	missed: undetectable	0.563902573347839	1
6.8	50% subclinical	Mean incubation 4.5d	detected: departure fever screen	0	0.298451395200973
6.8	50% subclinical	Mean incubation 4.5d	detected: departure risk screen	0.298451395200973	0.333528825440924
6.8	50% subclinical	Mean incubation 4.5d	detected: arrival fever screen	0.333528825440924	0.439193876847379
6.8	50% subclinical	Mean incubation 4.5d	detected: arrival risk screen	0.439193876847379	0.461330960656035
6.8	50% subclinical	Mean incubation 4.5d	missed: had both	0.461330960656035	0.46669366063343
6.8	50% subclinical	Mean incubation 4.5d	missed: had fever	0.46669366063343	0.50482841602824
6.8	50% subclinical	Mean incubation 4.5d	missed: had risk awareness	0.50482841602824	0.565876967476814
6.8	50% subclinical	Mean incubation 4.5d	missed: undetectable	0.565876967476814	1
6.9	50% subclinical	Mean incubation 4.5d	detected: departure fever screen	0	0.301106201242217
6.9	50% subclinical	Mean incubation 4.5d	detected: departure risk screen	0.301106201242217	0.336050891180106
6.9	50% subclinical	Mean incubation 4.5d	detected: arrival fever screen	0.336050891180106	0.441511006535733
6.9	50% subclinical	Mean incubation 4.5d	detected: arrival risk screen	0.441511006535733	0.463556624698796
6.9	50% subclinical	Mean incubation 4.5d	missed: had both	0.463556624698796	0.468908923786394
6.9	50% subclinical	Mean incubation 4.5d	missed: had fever	0.468908923786394	0.506969717298199
6.9	50% subclinical	Mean incubation 4.5d	missed: had risk awareness	0.506969717298199	0.567754272699791
6.9	50% subclinical	Mean incubation 4.5d	missed: undetectable	0.567754272699791	1
7	50% subclinical	Mean incubation 4.5d	detected: departure fever screen	0	0.303643157088327
7	50% subclinical	Mean incubation 4.5d	detected: departure risk screen	0.303643157088327	0.338460999233911
7	50% subclinical	Mean incubation 4.5d	detected: arrival fever screen	0.338460999233911	0.443717090049027
7	50% subclinical	Mean incubation 4.5d	detected: arrival risk screen	0.443717090049027	0.465675625968145
7	50% subclinical	Mean incubation 4.5d	missed: had both	0.465675625968145	0.471017570426807
7	50% subclinical	Mean incubation 4.5d	missed: had fever	0.471017570426807	0.509004731021736
7	50% subclinical	Mean incubation 4.5d	missed: had risk awareness	0.509004731021736	0.569538394320426
7	50% subclinical	Mean incubation 4.5d	missed: undetectable	0.569538394320426	1
7.1	50% subclinical	Mean incubation 4.5d	detected: departure fever screen	0	0.306065988683539
7.1	50% subclinical	Mean incubation 4.5d	detected: departure risk screen	0.306065988683539	0.340762689249362
7.1	50% subclinical	Mean incubation 4.5d	detected: arrival fever screen	0.340762689249362	0.445816365123163
7.1	50% subclinical	Mean incubation 4.5d	detected: arrival risk screen	0.445816365123163	0.467692034920933
7.1	50% subclinical	Mean incubation 4.5d	missed: had both	0.467692034920933	0.473023706440844
7.1	50% subclinical	Mean incubation 4.5d	missed: had fever	0.473023706440844	0.510937815026878
7.1	50% subclinical	Mean incubation 4.5d	missed: had risk awareness	0.510937815026878	0.571233152900276
7.1	50% subclinical	Mean incubation 4.5d	missed: undetectable	0.571233152900276	1
7.2	50% subclinical	Mean incubation 4.5d	detected: departure fever screen	0	0.308378433388932
7.2	50% subclinical	Mean incubation 4.5d	detected: departure risk screen	0.308378433388932	0.342959511719486
7.2	50% subclinical	Mean incubation 4.5d	detected: arrival fever screen	0.342959511719486	0.447812998106169
7.2	50% subclinical	Mean incubation 4.5d	detected: arrival risk screen	0.447812998106169	0.469609853444083
7.2	50% subclinical	Mean incubation 4.5d	missed: had both	0.469609853444083	0.474931364971227
7.2	50% subclinical	Mean incubation 4.5d	missed: had fever	0.474931364971227	0.512773224719804
7.2	50% subclinical	Mean incubation 4.5d	missed: had risk awareness	0.512773224719804	0.572842279206404
7.2	50% subclinical	Mean incubation 4.5d	missed: undetectable	0.572842279206404	1
7.3	50% subclinical	Mean incubation 4.5d	detected: departure fever screen	0	0.310584225489523
7.3	50% subclinical	Mean incubation 4.5d	detected: departure risk screen	0.310584225489523	0.345055014215047
7.3	50% subclinical	Mean incubation 4.5d	detected: arrival fever screen	0.345055014215047	0.449711076348155
7.3	50% subclinical	Mean incubation 4.5d	detected: arrival risk screen	0.449711076348155	0.471433007544939
7.3	50% subclinical	Mean incubation 4.5d	missed: had both	0.471433007544939	0.476744499420115
7.3	50% subclinical	Mean incubation 4.5d	missed: had fever	0.476744499420115	0.514515108310259
7.3	50% subclinical	Mean incubation 4.5d	missed: had risk awareness	0.514515108310259	0.574369410025433
7.3	50% subclinical	Mean incubation 4.5d	missed: undetectable	0.574369410025433	1
7.4	50% subclinical	Mean incubation 4.5d	detected: departure fever screen	0	0.312687083133777
7.4	50% subclinical	Mean incubation 4.5d	detected: departure risk screen	0.312687083133777	0.347052728977088
7.4	50% subclinical	Mean incubation 4.5d	detected: arrival fever screen	0.347052728977088	0.451514601660493
7.4	50% subclinical	Mean incubation 4.5d	detected: arrival risk screen	0.451514601660493	0.473165341068632
7.4	50% subclinical	Mean incubation 4.5d	missed: had both	0.473165341068632	0.478466977464218
7.4	50% subclinical	Mean incubation 4.5d	missed: had fever	0.478466977464218	0.516167502943943
7.4	50% subclinical	Mean incubation 4.5d	missed: had risk awareness	0.516167502943943	0.575818084772772
7.4	50% subclinical	Mean incubation 4.5d	missed: undetectable	0.575818084772772	1
7.5	50% subclinical	Mean incubation 4.5d	detected: departure fever screen	0	0.314690696624185
7.5	50% subclinical	Mean incubation 4.5d	detected: departure risk screen	0.314690696624185	0.348956161792976
7.5	50% subclinical	Mean incubation 4.5d	detected: arrival fever screen	0.348956161792976	0.453227484764683
7.5	50% subclinical	Mean incubation 4.5d	detected: arrival risk screen	0.453227484764683	0.474810610366077
7.5	50% subclinical	Mean incubation 4.5d	missed: had both	0.474810610366077	0.480102576005618
7.5	50% subclinical	Mean incubation 4.5d	missed: had fever	0.480102576005618	0.51773433166458
7.5	50% subclinical	Mean incubation 4.5d	missed: had risk awareness	0.51773433166458	0.577191742829221
7.5	50% subclinical	Mean incubation 4.5d	missed: undetectable	0.577191742829221	1
7.6	50% subclinical	Mean incubation 4.5d	detected: departure fever screen	0	0.316598717978122
7.6	50% subclinical	Mean incubation 4.5d	detected: departure risk screen	0.316598717978122	0.350768782079216
7.6	50% subclinical	Mean incubation 4.5d	detected: arrival fever screen	0.350768782079216	0.454853540654496
7.6	50% subclinical	Mean incubation 4.5d	detected: arrival risk screen	0.454853540654496	0.476372479839187
7.6	50% subclinical	Mean incubation 4.5d	missed: had both	0.476372479839187	0.481654976984925
7.6	50% subclinical	Mean incubation 4.5d	missed: had fever	0.481654976984925	0.519219401132395
7.6	50% subclinical	Mean incubation 4.5d	missed: had risk awareness	0.519219401132395	0.57849372154073
7.6	50% subclinical	Mean incubation 4.5d	missed: undetectable	0.57849372154073	1
7.7	50% subclinical	Mean incubation 4.5d	detected: departure fever screen	0	0.318414751679359
7.7	50% subclinical	Mean incubation 4.5d	detected: departure risk screen	0.318414751679359	0.352494014095391
7.7	50% subclinical	Mean incubation 4.5d	detected: arrival fever screen	0.352494014095391	0.456396484798265
7.7	50% subclinical	Mean incubation 4.5d	detected: arrival risk screen	0.456396484798265	0.477854518293071
7.7	50% subclinical	Mean incubation 4.5d	missed: had both	0.477854518293071	0.483127763986637
7.7	50% subclinical	Mean incubation 4.5d	missed: had fever	0.483127763986637	0.52062640002978
7.7	50% subclinical	Mean incubation 4.5d	missed: had risk awareness	0.52062640002978	0.579727254820629
7.7	50% subclinical	Mean incubation 4.5d	missed: undetectable	0.579727254820629	1
7.8	50% subclinical	Mean incubation 4.5d	detected: departure fever screen	0	0.320142346542212
7.8	50% subclinical	Mean incubation 4.5d	detected: departure risk screen	0.320142346542212	0.354135229215101
7.8	50% subclinical	Mean incubation 4.5d	detected: arrival fever screen	0.354135229215101	0.457859930111535
7.8	50% subclinical	Mean incubation 4.5d	detected: arrival risk screen	0.457859930111535	0.479260196028185
7.8	50% subclinical	Mean incubation 4.5d	missed: had both	0.479260196028185	0.484524419569922
7.8	50% subclinical	Mean incubation 4.5d	missed: had fever	0.484524419569922	0.521958898088935
7.8	50% subclinical	Mean incubation 4.5d	missed: had risk awareness	0.521958898088935	0.580895472297149
7.8	50% subclinical	Mean incubation 4.5d	missed: undetectable	0.580895472297149	1
7.9	50% subclinical	Mean incubation 4.5d	detected: departure fever screen	0	0.321784988612317
7.9	50% subclinical	Mean incubation 4.5d	detected: departure risk screen	0.321784988612317	0.355695739181701
7.9	50% subclinical	Mean incubation 4.5d	detected: arrival fever screen	0.355695739181701	0.459247384633793
7.9	50% subclinical	Mean incubation 4.5d	detected: arrival risk screen	0.459247384633793	0.480592882608775
7.9	50% subclinical	Mean incubation 4.5d	missed: had both	0.480592882608775	0.485848323261419
7.9	50% subclinical	Mean incubation 4.5d	missed: had fever	0.485848323261419	0.523220345680219
7.9	50% subclinical	Mean incubation 4.5d	missed: had risk awareness	0.523220345680219	0.582001398952521
7.9	50% subclinical	Mean incubation 4.5d	missed: undetectable	0.582001398952521	1
8	50% subclinical	Mean incubation 4.5d	detected: departure fever screen	0	0.323346095030373
8	50% subclinical	Mean incubation 4.5d	detected: departure risk screen	0.323346095030373	0.357178790278854
8	50% subclinical	Mean incubation 4.5d	detected: arrival fever screen	0.357178790278854	0.460562249846421
8	50% subclinical	Mean incubation 4.5d	detected: arrival risk screen	0.460562249846421	0.481855845247221
8	50% subclinical	Mean incubation 4.5d	missed: had both	0.481855845247221	0.487102750150086
8	50% subclinical	Mean incubation 4.5d	missed: had fever	0.487102750150086	0.524414073903794
8	50% subclinical	Mean incubation 4.5d	missed: had risk awareness	0.524414073903794	0.583047955203327
8	50% subclinical	Mean incubation 4.5d	missed: undetectable	0.583047955203327	1
8.1	50% subclinical	Mean incubation 4.5d	detected: departure fever screen	0	0.324829008787742
8.1	50% subclinical	Mean incubation 4.5d	detected: departure risk screen	0.324829008787742	0.358587558348355
8.1	50% subclinical	Mean incubation 4.5d	detected: arrival fever screen	0.358587558348355	0.461807819572531
8.1	50% subclinical	Mean incubation 4.5d	detected: arrival risk screen	0.461807819572531	0.4830522477473
8.1	50% subclinical	Mean incubation 4.5d	missed: had both	0.4830522477473	0.488290870027474
8.1	50% subclinical	Mean incubation 4.5d	missed: had fever	0.488290870027474	0.525543295130936
8.1	50% subclinical	Mean incubation 4.5d	missed: had risk awareness	0.525543295130936	0.584037957375067
8.1	50% subclinical	Mean incubation 4.5d	missed: undetectable	0.584037957375067	1
8.2	50% subclinical	Mean incubation 4.5d	detected: departure fever screen	0	0.326236994305603
8.2	50% subclinical	Mean incubation 4.5d	detected: departure risk screen	0.326236994305603	0.359925144590323
8.2	50% subclinical	Mean incubation 4.5d	detected: arrival fever screen	0.359925144590323	0.46298727940276
8.2	50% subclinical	Mean incubation 4.5d	detected: arrival risk screen	0.46298727940276	0.484185149952651
8.2	50% subclinical	Mean incubation 4.5d	missed: had both	0.484185149952651	0.4894157470202
8.2	50% subclinical	Mean incubation 4.5d	missed: had fever	0.4894157470202	0.526611103944989
8.2	50% subclinical	Mean incubation 4.5d	missed: had risk awareness	0.526611103944989	0.584974118527113
8.2	50% subclinical	Mean incubation 4.5d	missed: undetectable	0.584974118527113	1
8.3	50% subclinical	Mean incubation 4.5d	detected: departure fever screen	0	0.327573233772254
8.3	50% subclinical	Mean incubation 4.5d	detected: departure risk screen	0.327573233772254	0.361194572083641
8.3	50% subclinical	Mean incubation 4.5d	detected: arrival fever screen	0.361194572083641	0.464103706594517
8.3	50% subclinical	Mean incubation 4.5d	detected: arrival risk screen	0.464103706594517	0.485257507649996
8.3	50% subclinical	Mean incubation 4.5d	missed: had both	0.485257507649996	0.490480339664646
8.3	50% subclinical	Mean incubation 4.5d	missed: had fever	0.490480339664646	0.527620478435488
8.3	50% subclinical	Mean incubation 4.5d	missed: had risk awareness	0.527620478435488	0.585859049587277
8.3	50% subclinical	Mean incubation 4.5d	missed: undetectable	0.585859049587277	1
8.4	50% subclinical	Mean incubation 4.5d	detected: departure fever screen	0	0.328840824176176
8.4	50% subclinical	Mean incubation 4.5d	detected: departure risk screen	0.328840824176176	0.362398782967367
8.4	50% subclinical	Mean incubation 4.5d	detected: arrival fever screen	0.362398782967367	0.465160070395481
8.4	50% subclinical	Mean incubation 4.5d	detected: arrival risk screen	0.465160070395481	0.48627217287987
8.4	50% subclinical	Mean incubation 4.5d	missed: had both	0.48627217287987	0.491487501377161
8.4	50% subclinical	Mean incubation 4.5d	missed: had fever	0.491487501377161	0.528574281802345
8.4	50% subclinical	Mean incubation 4.5d	missed: had risk awareness	0.528574281802345	0.58669526075822
8.4	50% subclinical	Mean incubation 4.5d	missed: undetectable	0.58669526075822	1
8.5	50% subclinical	Mean incubation 4.5d	detected: departure fever screen	0	0.330042774975568
8.5	50% subclinical	Mean incubation 4.5d	detected: departure risk screen	0.330042774975568	0.36354063622679
8.5	50% subclinical	Mean incubation 4.5d	detected: arrival fever screen	0.36354063622679	0.466159232745394
8.5	50% subclinical	Mean incubation 4.5d	detected: arrival risk screen	0.466159232745394	0.487231894610707
8.5	50% subclinical	Mean incubation 4.5d	missed: had both	0.487231894610707	0.492439981276125
8.5	50% subclinical	Mean incubation 4.5d	missed: had fever	0.492439981276125	0.529475264230207
8.5	50% subclinical	Mean incubation 4.5d	missed: had risk awareness	0.529475264230207	0.58748516316073
8.5	50% subclinical	Mean incubation 4.5d	missed: undetectable	0.58748516316073	1
8.6	50% subclinical	Mean incubation 4.5d	detected: departure fever screen	0	0.331182006348139
8.6	50% subclinical	Mean incubation 4.5d	detected: departure risk screen	0.331182006348139	0.364622906030732
8.6	50% subclinical	Mean incubation 4.5d	detected: arrival fever screen	0.364622906030732	0.467103949313314
8.6	50% subclinical	Mean incubation 4.5d	detected: arrival risk screen	0.467103949313314	0.488139319735157
8.6	50% subclinical	Mean incubation 4.5d	missed: had both	0.488139319735157	0.493340425315288
8.6	50% subclinical	Mean incubation 4.5d	missed: had fever	0.493340425315288	0.53032606499622
8.6	50% subclinical	Mean incubation 4.5d	missed: had risk awareness	0.53032606499622	0.588231070681618
8.6	50% subclinical	Mean incubation 4.5d	missed: undetectable	0.588231070681618	1
8.7	50% subclinical	Mean incubation 4.5d	detected: departure fever screen	0	0.33226134796805
8.7	50% subclinical	Mean incubation 4.5d	detected: departure risk screen	0.33226134796805	0.365648280569648
8.7	50% subclinical	Mean incubation 4.5d	detected: arrival fever screen	0.365648280569648	0.467996870830538
8.7	50% subclinical	Mean incubation 4.5d	detected: arrival risk screen	0.467996870830538	0.488996994350386
8.7	50% subclinical	Mean incubation 4.5d	missed: had both	0.488996994350386	0.494191377690694
8.7	50% subclinical	Mean incubation 4.5d	missed: had fever	0.494191377690694	0.531129214777331
8.7	50% subclinical	Mean incubation 4.5d	missed: had risk awareness	0.531129214777331	0.588935201996564
8.7	50% subclinical	Mean incubation 4.5d	missed: undetectable	0.588935201996564	1
8.8	50% subclinical	Mean incubation 4.5d	detected: departure fever screen	0	0.333283538260005
8.8	50% subclinical	Mean incubation 4.5d	detected: departure risk screen	0.333283538260005	0.366619361347005
8.8	50% subclinical	Mean incubation 4.5d	detected: arrival fever screen	0.366619361347005	0.468840544682282
8.8	50% subclinical	Mean incubation 4.5d	detected: arrival risk screen	0.468840544682282	0.489807365286929
8.8	50% subclinical	Mean incubation 4.5d	missed: had both	0.489807365286929	0.494995282486276
8.8	50% subclinical	Mean incubation 4.5d	missed: had fever	0.494995282486276	0.531887138126075
8.8	50% subclinical	Mean incubation 4.5d	missed: had risk awareness	0.531887138126075	0.589599682740669
8.8	50% subclinical	Mean incubation 4.5d	missed: undetectable	0.589599682740669	1
8.9	50% subclinical	Mean incubation 4.5d	detected: departure fever screen	0	0.334251224083456
8.9	50% subclinical	Mean incubation 4.5d	detected: departure risk screen	0.334251224083456	0.367538662879283
8.9	50% subclinical	Mean incubation 4.5d	detected: arrival fever screen	0.367538662879283	0.469637416724017
8.9	50% subclinical	Mean incubation 4.5d	detected: arrival risk screen	0.469637416724017	0.490572781853332
8.9	50% subclinical	Mean incubation 4.5d	missed: had both	0.490572781853332	0.495754485525903
8.9	50% subclinical	Mean incubation 4.5d	missed: had fever	0.495754485525903	0.532602156086408
8.9	50% subclinical	Mean incubation 4.5d	missed: had risk awareness	0.532602156086408	0.590226547801783
8.9	50% subclinical	Mean incubation 4.5d	missed: undetectable	0.590226547801783	1
9	50% subclinical	Mean incubation 4.5d	detected: departure fever screen	0	0.335166960802911
9	50% subclinical	Mean incubation 4.5d	detected: departure risk screen	0.335166960802911	0.368408612762765
9	50% subclinical	Mean incubation 4.5d	detected: arrival fever screen	0.368408612762765	0.470389833290992
9	50% subclinical	Mean incubation 4.5d	detected: arrival risk screen	0.470389833290992	0.491295497766348
9	50% subclinical	Mean incubation 4.5d	missed: had both	0.491295497766348	0.496471236402179
9	50% subclinical	Mean incubation 4.5d	missed: had fever	0.496471236402179	0.533276488923645
9	50% subclinical	Mean incubation 4.5d	missed: had risk awareness	0.533276488923645	0.59081774371388
9	50% subclinical	Mean incubation 4.5d	missed: undetectable	0.59081774371388	1
9.1	50% subclinical	Mean incubation 4.5d	detected: departure fever screen	0	0.336033212703184
9.1	50% subclinical	Mean incubation 4.5d	detected: departure risk screen	0.336033212703184	0.369231552068025
9.1	50% subclinical	Mean incubation 4.5d	detected: arrival fever screen	0.369231552068025	0.471100043372025
9.1	50% subclinical	Mean incubation 4.5d	detected: arrival risk screen	0.471100043372025	0.491977673238919
9.1	50% subclinical	Mean incubation 4.5d	missed: had both	0.491977673238919	0.497147690654724
9.1	50% subclinical	Mean incubation 4.5d	missed: had fever	0.497147690654724	0.533912258944889
9.1	50% subclinical	Mean incubation 4.5d	missed: had risk awareness	0.533912258944889	0.591375131129766
9.1	50% subclinical	Mean incubation 4.5d	missed: undetectable	0.591375131129766	1
9.2	50% subclinical	Mean incubation 4.5d	detected: departure fever screen	0	0.336852353711224
9.2	50% subclinical	Mean incubation 4.5d	detected: departure risk screen	0.336852353711224	0.370009736025663
9.2	50% subclinical	Mean incubation 4.5d	detected: arrival fever screen	0.370009736025663	0.471770200921004
9.2	50% subclinical	Mean incubation 4.5d	detected: arrival risk screen	0.471770200921004	0.492621377200438
9.2	50% subclinical	Mean incubation 4.5d	missed: had both	0.492621377200438	0.497785912072946
9.2	50% subclinical	Mean incubation 4.5d	missed: had fever	0.497785912072946	0.534511493388557
9.2	50% subclinical	Mean incubation 4.5d	missed: had risk awareness	0.534511493388557	0.591900487354352
9.2	50% subclinical	Mean incubation 4.5d	missed: undetectable	0.591900487354352	1
9.3	50% subclinical	Mean incubation 4.5d	detected: departure fever screen	0	0.337626668388868
9.3	50% subclinical	Mean incubation 4.5d	detected: departure risk screen	0.337626668388868	0.370745334969424
9.3	50% subclinical	Mean incubation 4.5d	detected: arrival fever screen	0.370745334969424	0.472402367281845
9.3	50% subclinical	Mean incubation 4.5d	detected: arrival risk screen	0.472402367281845	0.493228589625983
9.3	50% subclinical	Mean incubation 4.5d	missed: had both	0.493228589625983	0.498387875100485
9.3	50% subclinical	Mean incubation 4.5d	missed: had fever	0.498387875100485	0.535076127363614
9.3	50% subclinical	Mean incubation 4.5d	missed: had risk awareness	0.535076127363614	0.592395508921525
9.3	50% subclinical	Mean incubation 4.5d	missed: undetectable	0.592395508921525	1
9.4	50% subclinical	Mean incubation 4.5d	detected: departure fever screen	0	0.338358353163443
9.4	50% subclinical	Mean incubation 4.5d	detected: departure risk screen	0.338358353163443	0.371440435505271
9.4	50% subclinical	Mean incubation 4.5d	detected: arrival fever screen	0.371440435505271	0.472998513704773
9.4	50% subclinical	Mean incubation 4.5d	detected: arrival risk screen	0.472998513704773	0.493801203953268
9.4	50% subclinical	Mean incubation 4.5d	missed: had both	0.493801203953268	0.498955467320536
9.4	50% subclinical	Mean incubation 4.5d	missed: had fever	0.498955467320536	0.535608006821108
9.4	50% subclinical	Mean incubation 4.5d	missed: had risk awareness	0.535608006821108	0.592861814199328
9.4	50% subclinical	Mean incubation 4.5d	missed: undetectable	0.592861814199328	1
9.5	50% subclinical	Mean incubation 4.5d	detected: departure fever screen	0	0.339049517765639
9.5	50% subclinical	Mean incubation 4.5d	detected: departure risk screen	0.339049517765639	0.372097041877357
9.5	50% subclinical	Mean incubation 4.5d	detected: arrival fever screen	0.372097041877357	0.473560523933789
9.5	50% subclinical	Mean incubation 4.5d	detected: arrival risk screen	0.473560523933789	0.494341029567981
9.5	50% subclinical	Mean incubation 4.5d	missed: had both	0.494341029567981	0.499490492003176
9.5	50% subclinical	Mean incubation 4.5d	missed: had fever	0.499490492003176	0.536108891542339
9.5	50% subclinical	Mean incubation 4.5d	missed: had risk awareness	0.536108891542339	0.593300946009722
9.5	50% subclinical	Mean incubation 4.5d	missed: undetectable	0.593300946009722	1
9.6	50% subclinical	Mean incubation 4.5d	detected: departure fever screen	0	0.339702186846416
9.6	50% subclinical	Mean incubation 4.5d	detected: departure risk screen	0.339702186846416	0.372717077504095
9.6	50% subclinical	Mean incubation 4.5d	detected: arrival fever screen	0.372717077504095	0.474090196847107
9.6	50% subclinical	Mean incubation 4.5d	detected: arrival risk screen	0.474090196847107	0.494849794339985
9.6	50% subclinical	Mean incubation 4.5d	missed: had both	0.494849794339985	0.499994670697619
9.6	50% subclinical	Mean incubation 4.5d	missed: had fever	0.499994670697619	0.536580458129683
9.6	50% subclinical	Mean incubation 4.5d	missed: had risk awareness	0.536580458129683	0.593714374250681
9.6	50% subclinical	Mean incubation 4.5d	missed: undetectable	0.593714374250681	1
9.7	50% subclinical	Mean incubation 4.5d	detected: departure fever screen	0	0.340318301746994
9.7	50% subclinical	Mean incubation 4.5d	detected: departure risk screen	0.340318301746994	0.373302386659644
9.7	50% subclinical	Mean incubation 4.5d	detected: arrival fever screen	0.373302386659644	0.474589249134083
9.7	50% subclinical	Mean incubation 4.5d	detected: arrival risk screen	0.474589249134083	0.49532914719458
9.7	50% subclinical	Mean incubation 4.5d	missed: had both	0.49532914719458	0.500469645853997
9.7	50% subclinical	Mean incubation 4.5d	missed: had fever	0.500469645853997	0.537024302987629
9.7	50% subclinical	Mean incubation 4.5d	missed: had risk awareness	0.537024302987629	0.594103498509702
9.7	50% subclinical	Mean incubation 4.5d	missed: undetectable	0.594103498509702	1
9.8	50% subclinical	Mean incubation 4.5d	detected: departure fever screen	0	0.340899722398085
9.8	50% subclinical	Mean incubation 4.5d	detected: departure risk screen	0.340899722398085	0.373854736278181
9.8	50% subclinical	Mean incubation 4.5d	detected: arrival fever screen	0.373854736278181	0.475059317993816
9.8	50% subclinical	Mean incubation 4.5d	detected: arrival risk screen	0.475059317993816	0.495780660704586
9.8	50% subclinical	Mean incubation 4.5d	missed: had both	0.495780660704586	0.500916983460831
9.8	50% subclinical	Mean incubation 4.5d	missed: had fever	0.500916983460831	0.537441945283015
9.8	50% subclinical	Mean incubation 4.5d	missed: had risk awareness	0.537441945283015	0.594469650659081
9.8	50% subclinical	Mean incubation 4.5d	missed: undetectable	0.594469650659081	1
9.9	50% subclinical	Mean incubation 4.5d	detected: departure fever screen	0	0.34144822932656
9.9	50% subclinical	Mean incubation 4.5d	detected: departure risk screen	0.34144822932656	0.374375817860232
9.9	50% subclinical	Mean incubation 4.5d	detected: arrival fever screen	0.374375817860232	0.475501963842151
9.9	50% subclinical	Mean incubation 4.5d	detected: arrival risk screen	0.475501963842151	0.496205833690487
9.9	50% subclinical	Mean incubation 4.5d	missed: had both	0.496205833690487	0.50133817568581
9.9	50% subclinical	Mean incubation 4.5d	missed: had fever	0.50133817568581	0.537834829874773
9.9	50% subclinical	Mean incubation 4.5d	missed: had risk awareness	0.537834829874773	0.594814097424458
9.9	50% subclinical	Mean incubation 4.5d	missed: undetectable	0.594814097424458	1
10	50% subclinical	Mean incubation 4.5d	detected: departure fever screen	0	0.341965525749645
10	50% subclinical	Mean incubation 4.5d	detected: departure risk screen	0.341965525749645	0.374867249462163
10	50% subclinical	Mean incubation 4.5d	detected: arrival fever screen	0.374867249462163	0.475918673015231
10	50% subclinical	Mean incubation 4.5d	detected: arrival risk screen	0.475918673015231	0.496606093817261
10	50% subclinical	Mean incubation 4.5d	missed: had both	0.496606093817261	0.501734643508865
10	50% subclinical	Mean incubation 4.5d	missed: had fever	0.501734643508865	0.538204330204709
10	50% subclinical	Mean incubation 4.5d	missed: had risk awareness	0.538204330204709	0.595138042919197
10	50% subclinical	Mean incubation 4.5d	missed: undetectable	0.595138042919197	1
10.1	50% subclinical	Mean incubation 4.5d	detected: departure fever screen	0	0.342453239738545
10.1	50% subclinical	Mean incubation 4.5d	detected: departure risk screen	0.342453239738545	0.375330577751618
10.1	50% subclinical	Mean incubation 4.5d	detected: arrival fever screen	0.375330577751618	0.47631086045907
10.1	50% subclinical	Mean incubation 4.5d	detected: arrival risk screen	0.47631086045907	0.496982800177791
10.1	50% subclinical	Mean incubation 4.5d	missed: had both	0.496982800177791	0.502107739337756
10.1	50% subclinical	Mean incubation 4.5d	missed: had fever	0.502107739337756	0.538551751141949
10.1	50% subclinical	Mean incubation 4.5d	missed: had risk awareness	0.538551751141949	0.595442631138147
10.1	50% subclinical	Mean incubation 4.5d	missed: undetectable	0.595442631138147	1
10.2	50% subclinical	Mean incubation 4.5d	detected: departure fever screen	0	0.342912926435058
10.2	50% subclinical	Mean incubation 4.5d	detected: departure risk screen	0.342912926435058	0.375767280113305
10.2	50% subclinical	Mean incubation 4.5d	detected: arrival fever screen	0.375767280113305	0.476679872395857
10.2	50% subclinical	Mean incubation 4.5d	detected: arrival risk screen	0.476679872395857	0.497337245853916
10.2	50% subclinical	Mean incubation 4.5d	missed: had both	0.497337245853916	0.502458749597579
10.2	50% subclinical	Mean incubation 4.5d	missed: had fever	0.502458749597579	0.538878331774741
10.2	50% subclinical	Mean incubation 4.5d	missed: had risk awareness	0.538878331774741	0.595728948405252
10.2	50% subclinical	Mean incubation 4.5d	missed: undetectable	0.595728948405252	1
10.3	50% subclinical	Mean incubation 4.5d	detected: departure fever screen	0	0.343346070306334
10.3	50% subclinical	Mean incubation 4.5d	detected: departure risk screen	0.343346070306334	0.376178766791018
10.3	50% subclinical	Mean incubation 4.5d	detected: arrival fever screen	0.376178766791018	0.477026988958827
10.3	50% subclinical	Mean incubation 4.5d	detected: arrival risk screen	0.477026988958827	0.497670660447294
10.3	50% subclinical	Mean incubation 4.5d	missed: had both	0.497670660447294	0.502788897286638
10.3	50% subclinical	Mean incubation 4.5d	missed: had fever	0.502788897286638	0.539185248144193
10.3	50% subclinical	Mean incubation 4.5d	missed: had risk awareness	0.539185248144193	0.595998025770251
10.3	50% subclinical	Mean incubation 4.5d	missed: undetectable	0.595998025770251	1
10.4	50% subclinical	Mean incubation 4.5d	detected: departure fever screen	0	0.343754087424412
10.4	50% subclinical	Mean incubation 4.5d	detected: departure risk screen	0.343754087424412	0.376566383053191
10.4	50% subclinical	Mean incubation 4.5d	detected: arrival fever screen	0.376566383053191	0.477353426788578
10.4	50% subclinical	Mean incubation 4.5d	detected: arrival risk screen	0.477353426788578	0.49798421257324
10.4	50% subclinical	Mean incubation 4.5d	missed: had both	0.49798421257324	0.503099344492141
10.4	50% subclinical	Mean incubation 4.5d	missed: had fever	0.503099344492141	0.539473615915438
10.4	50% subclinical	Mean incubation 4.5d	missed: had risk awareness	0.539473615915438	0.596250841350521
10.4	50% subclinical	Mean incubation 4.5d	missed: undetectable	0.596250841350521	1
10.5	50% subclinical	Mean incubation 4.5d	detected: departure fever screen	0	0.344138327758507
10.5	50% subclinical	Mean incubation 4.5d	detected: departure risk screen	0.344138327758507	0.376931411370582
10.5	50% subclinical	Mean incubation 4.5d	detected: arrival fever screen	0.376931411370582	0.47766034158469
10.5	50% subclinical	Mean incubation 4.5d	detected: arrival risk screen	0.47766034158469	0.49827901231161
10.5	50% subclinical	Mean incubation 4.5d	missed: had both	0.49827901231161	0.50339119486007
10.5	50% subclinical	Mean incubation 4.5d	missed: had fever	0.50339119486007	0.539744492982455
10.5	50% subclinical	Mean incubation 4.5d	missed: had risk awareness	0.539744492982455	0.596488322614755
10.5	50% subclinical	Mean incubation 4.5d	missed: undetectable	0.596488322614755	1
10.6	50% subclinical	Mean incubation 4.5d	detected: departure fever screen	0	0.344500077469346
10.6	50% subclinical	Mean incubation 4.5d	detected: departure risk screen	0.344500077469346	0.377275073595879
10.6	50% subclinical	Mean incubation 4.5d	detected: arrival fever screen	0.377275073595879	0.47794883060734
10.6	50% subclinical	Mean incubation 4.5d	detected: arrival risk screen	0.47794883060734	0.498556113609682
10.6	50% subclinical	Mean incubation 4.5d	missed: had both	0.498556113609682	0.503665496014399
10.6	50% subclinical	Mean incubation 4.5d	missed: had fever	0.503665496014399	0.539998882003498
10.6	50% subclinical	Mean incubation 4.5d	missed: had risk awareness	0.539998882003498	0.596711348605807
10.6	50% subclinical	Mean incubation 4.5d	missed: undetectable	0.596711348605807	1
10.7	50% subclinical	Mean incubation 4.5d	detected: departure fever screen	0	0.344840561195989
10.7	50% subclinical	Mean incubation 4.5d	detected: departure risk screen	0.344840561195989	0.37759853313619
10.7	50% subclinical	Mean incubation 4.5d	detected: arrival fever screen	0.37759853313619	0.478219935124475
10.7	50% subclinical	Mean incubation 4.5d	detected: arrival risk screen	0.478219935124475	0.498816516632719
10.7	50% subclinical	Mean incubation 4.5d	missed: had both	0.498816516632719	0.503923241921598
10.7	50% subclinical	Mean incubation 4.5d	missed: had fever	0.503923241921598	0.540237732864739
10.7	50% subclinical	Mean incubation 4.5d	missed: had risk awareness	0.540237732864739	0.596920752100593
10.7	50% subclinical	Mean incubation 4.5d	missed: undetectable	0.596920752100593	1
10.8	50% subclinical	Mean incubation 4.5d	detected: departure fever screen	0	0.345160944326696
10.8	50% subclinical	Mean incubation 4.5d	detected: departure risk screen	0.345160944326696	0.377902897110361
10.8	50% subclinical	Mean incubation 4.5d	detected: arrival fever screen	0.377902897110361	0.478474642800769
10.8	50% subclinical	Mean incubation 4.5d	detected: arrival risk screen	0.478474642800769	0.499061170058633
10.8	50% subclinical	Mean incubation 4.5d	missed: had both	0.499061170058633	0.504165375197056
10.8	50% subclinical	Mean incubation 4.5d	missed: had fever	0.504165375197056	0.540461945070286
10.8	50% subclinical	Mean incubation 4.5d	missed: had risk awareness	0.540461945070286	0.597117321705456
10.8	50% subclinical	Mean incubation 4.5d	missed: undetectable	0.597117321705456	1
10.9	50% subclinical	Mean incubation 4.5d	detected: departure fever screen	0	0.345462335246401
10.9	50% subclinical	Mean incubation 4.5d	detected: departure risk screen	0.345462335246401	0.378189218484081
10.9	50% subclinical	Mean incubation 4.5d	detected: arrival fever screen	0.378189218484081	0.478713890025326
10.9	50% subclinical	Mean incubation 4.5d	detected: arrival risk screen	0.478713890025326	0.4992909733138
10.9	50% subclinical	Mean incubation 4.5d	missed: had both	0.4992909733138	0.504392789350667
10.9	50% subclinical	Mean incubation 4.5d	missed: had fever	0.504392789350667	0.540672370057282
10.9	50% subclinical	Mean incubation 4.5d	missed: had risk awareness	0.540672370057282	0.597301803885836
10.9	50% subclinical	Mean incubation 4.5d	missed: undetectable	0.597301803885836	1
11	50% subclinical	Mean incubation 4.5d	detected: departure fever screen	0	0.345745787554297
11	50% subclinical	Mean incubation 4.5d	detected: departure risk screen	0.345745787554297	0.378458498176582
11	50% subclinical	Mean incubation 4.5d	detected: arrival fever screen	0.378458498176582	0.478938564175636
11	50% subclinical	Mean incubation 4.5d	detected: arrival risk screen	0.478938564175636	0.499506778747651
11	50% subclinical	Mean incubation 4.5d	missed: had both	0.499506778747651	0.504606330969407
11	50% subclinical	Mean incubation 4.5d	missed: had fever	0.504606330969407	0.540869813435231
11	50% subclinical	Mean incubation 4.5d	missed: had risk awareness	0.540869813435231	0.597474904929518
11	50% subclinical	Mean incubation 4.5d	missed: undetectable	0.597474904929518	1
11.1	50% subclinical	Mean incubation 4.5d	detected: departure fever screen	0	0.346012302245879
11.1	50% subclinical	Mean incubation 4.5d	detected: departure risk screen	0.346012302245879	0.378711687133585
11.1	50% subclinical	Mean incubation 4.5d	detected: arrival fever screen	0.378711687133585	0.479149505815893
11.1	50% subclinical	Mean incubation 4.5d	detected: arrival risk screen	0.479149505815893	0.499709393744213
11.1	50% subclinical	Mean incubation 4.5d	missed: had both	0.499709393744213	0.504806801835232
11.1	50% subclinical	Mean incubation 4.5d	missed: had fever	0.504806801835232	0.541055037149148
11.1	50% subclinical	Mean incubation 4.5d	missed: had risk awareness	0.541055037149148	0.597637292843089
11.1	50% subclinical	Mean incubation 4.5d	missed: undetectable	0.597637292843089	1
11.2	50% subclinical	Mean incubation 4.5d	detected: departure fever screen	0	0.346262829854596
11.2	50% subclinical	Mean incubation 4.5d	detected: departure risk screen	0.346262829854596	0.378949688361866
11.2	50% subclinical	Mean incubation 4.5d	detected: arrival fever screen	0.378949688361866	0.479347510828227
11.2	50% subclinical	Mean incubation 4.5d	detected: arrival risk screen	0.479347510828227	0.499899582769218
11.2	50% subclinical	Mean incubation 4.5d	missed: had both	0.499899582769218	0.504994960977097
11.2	50% subclinical	Mean incubation 4.5d	missed: had fever	0.504994960977097	0.54122876156646
11.2	50% subclinical	Mean incubation 4.5d	missed: had risk awareness	0.54122876156646	0.597789599181554
11.2	50% subclinical	Mean incubation 4.5d	missed: undetectable	0.597789599181554	1
11.3	50% subclinical	Mean incubation 4.5d	detected: departure fever screen	0	0.34649827254897
11.3	50% subclinical	Mean incubation 4.5d	detected: departure risk screen	0.34649827254897	0.379173358921521
11.3	50% subclinical	Mean incubation 4.5d	detected: arrival fever screen	0.379173358921521	0.479533332475902
11.3	50% subclinical	Mean incubation 4.5d	detected: arrival risk screen	0.479533332475902	0.500078069351854
11.3	50% subclinical	Mean incubation 4.5d	missed: had both	0.500078069351854	0.505171526656305
11.3	50% subclinical	Mean incubation 4.5d	missed: had fever	0.505171526656305	0.541391667487962
11.3	50% subclinical	Mean incubation 4.5d	missed: had risk awareness	0.541391667487962	0.597932420811364
11.3	50% subclinical	Mean incubation 4.5d	missed: undetectable	0.597932420811364	1
11.4	50% subclinical	Mean incubation 4.5d	detected: departure fever screen	0	0.346719486181706
11.4	50% subclinical	Mean incubation 4.5d	detected: departure risk screen	0.346719486181706	0.379383511872621
11.4	50% subclinical	Mean incubation 4.5d	detected: arrival fever screen	0.379383511872621	0.47970768339788
11.4	50% subclinical	Mean incubation 4.5d	detected: arrival risk screen	0.47970768339788	0.500245538000595
11.4	50% subclinical	Mean incubation 4.5d	missed: had both	0.500245538000595	0.505337178284772
11.4	50% subclinical	Mean incubation 4.5d	missed: had fever	0.505337178284772	0.541544398083362
11.4	50% subclinical	Mean incubation 4.5d	missed: had risk awareness	0.541544398083362	0.598066321607331
11.4	50% subclinical	Mean incubation 4.5d	missed: undetectable	0.598066321607331	1
11.5	50% subclinical	Mean incubation 4.5d	detected: departure fever screen	0	0.346927282287911
11.5	50% subclinical	Mean incubation 4.5d	detected: departure risk screen	0.346927282287911	0.379580918173515
11.5	50% subclinical	Mean incubation 4.5d	detected: arrival fever screen	0.379580918173515	0.47987123753453
11.5	50% subclinical	Mean incubation 4.5d	detected: arrival risk screen	0.47987123753453	0.500402636052904
11.5	50% subclinical	Mean incubation 4.5d	missed: had both	0.500402636052904	0.505492558276113
11.5	50% subclinical	Mean incubation 4.5d	missed: had fever	0.505492558276113	0.541687560752269
11.5	50% subclinical	Mean incubation 4.5d	missed: had risk awareness	0.541687560752269	0.598191834084181
11.5	50% subclinical	Mean incubation 4.5d	missed: undetectable	0.598191834084181	1
11.6	50% subclinical	Mean incubation 4.5d	detected: departure fever screen	0	0.347122430030081
11.6	50% subclinical	Mean incubation 4.5d	detected: departure risk screen	0.347122430030081	0.379766308528577
11.6	50% subclinical	Mean incubation 4.5d	detected: arrival fever screen	0.379766308528577	0.480024631984587
11.6	50% subclinical	Mean incubation 4.5d	detected: arrival risk screen	0.480024631984587	0.50054997545888
11.6	50% subclinical	Mean incubation 4.5d	missed: had both	0.50054997545888	0.505638273829767
11.6	50% subclinical	Mean incubation 4.5d	missed: had fever	0.505638273829767	0.541821728911636
11.6	50% subclinical	Mean incubation 4.5d	missed: had risk awareness	0.541821728911636	0.598309460963626
11.6	50% subclinical	Mean incubation 4.5d	missed: undetectable	0.598309460963626	1
11.7	50% subclinical	Mean incubation 4.5d	detected: departure fever screen	0	0.347305658088019
11.7	50% subclinical	Mean incubation 4.5d	detected: departure risk screen	0.347305658088019	0.379940375183618
11.7	50% subclinical	Mean incubation 4.5d	detected: arrival fever screen	0.379940375183618	0.480168468793716
11.7	50% subclinical	Mean incubation 4.5d	detected: arrival risk screen	0.480168468793716	0.500688134499228
11.7	50% subclinical	Mean incubation 4.5d	missed: had both	0.500688134499228	0.505774898648612
11.7	50% subclinical	Mean incubation 4.5d	missed: had fever	0.505774898648612	0.541947443710903
11.7	50% subclinical	Mean incubation 4.5d	missed: had risk awareness	0.541947443710903	0.598419676678052
11.7	50% subclinical	Mean incubation 4.5d	missed: undetectable	0.598419676678052	1
11.8	50% subclinical	Mean incubation 4.5d	detected: departure fever screen	0	0.347477656492274
11.8	50% subclinical	Mean incubation 4.5d	detected: departure risk screen	0.347477656492274	0.380103773667661
11.8	50% subclinical	Mean incubation 4.5d	detected: arrival fever screen	0.380103773667661	0.480303316675304
11.8	50% subclinical	Mean incubation 4.5d	detected: arrival risk screen	0.480303316675304	0.500817659438121
11.8	50% subclinical	Mean incubation 4.5d	missed: had both	0.500817659438121	0.505902974590764
11.8	50% subclinical	Mean incubation 4.5d	missed: had fever	0.505902974590764	0.542065215676229
11.8	50% subclinical	Mean incubation 4.5d	missed: had risk awareness	0.542065215676229	0.598522928812037
11.8	50% subclinical	Mean incubation 4.5d	missed: undetectable	0.598522928812037	1
11.9	50% subclinical	Mean incubation 4.5d	detected: departure fever screen	0	0.347639078400107
11.9	50% subclinical	Mean incubation 4.5d	detected: departure risk screen	0.347639078400107	0.380257124480101
11.9	50% subclinical	Mean incubation 4.5d	detected: arrival fever screen	0.380257124480101	0.480429712664303
11.9	50% subclinical	Mean incubation 4.5d	detected: arrival risk screen	0.480429712664303	0.500939066111765
11.9	50% subclinical	Mean incubation 4.5d	missed: had both	0.500939066111765	0.506023013256452
11.9	50% subclinical	Mean incubation 4.5d	missed: had fever	0.506023013256452	0.542175526285337
11.9	50% subclinical	Mean incubation 4.5d	missed: had risk awareness	0.542175526285337	0.598619639483035
11.9	50% subclinical	Mean incubation 4.5d	missed: undetectable	0.598619639483035	1
12	50% subclinical	Mean incubation 4.5d	detected: departure fever screen	0	0.347790541813328
12	50% subclinical	Mean incubation 4.5d	detected: departure risk screen	0.347790541813328	0.380401014722662
12	50% subclinical	Mean incubation 4.5d	detected: arrival fever screen	0.380401014722662	0.480548163705156
12	50% subclinical	Mean incubation 4.5d	detected: arrival risk screen	0.480548163705156	0.501052841453637
12	50% subclinical	Mean incubation 4.5d	missed: had both	0.501052841453637	0.506135497511019
12	50% subclinical	Mean incubation 4.5d	missed: had fever	0.506135497511019	0.542278829474626
12	50% subclinical	Mean incubation 4.5d	missed: had risk awareness	0.542278829474626	0.598710206662686
12	50% subclinical	Mean incubation 4.5d	missed: undetectable	0.598710206662686	1
12.1	50% subclinical	Mean incubation 4.5d	detected: departure fever screen	0	0.347932631237702
12.1	50% subclinical	Mean incubation 4.5d	detected: departure risk screen	0.347932631237702	0.380535999675817
12.1	50% subclinical	Mean incubation 4.5d	detected: arrival fever screen	0.380535999675817	0.480659148174955
12.1	50% subclinical	Mean incubation 4.5d	detected: arrival risk screen	0.480659148174955	0.501159444957522
12.1	50% subclinical	Mean incubation 4.5d	missed: had both	0.501159444957522	0.50624088294526
12.1	50% subclinical	Mean incubation 4.5d	missed: had fever	0.50624088294526	0.542375553080287
12.1	50% subclinical	Mean incubation 4.5d	missed: had risk awareness	0.542375553080287	0.598795005440252
12.1	50% subclinical	Mean incubation 4.5d	missed: undetectable	0.598795005440252	1
12.2	50% subclinical	Mean incubation 4.5d	detected: departure fever screen	0	0.34806589928386
12.2	50% subclinical	Mean incubation 4.5d	detected: departure risk screen	0.34806589928386	0.380662604319667
12.2	50% subclinical	Mean incubation 4.5d	detected: arrival fever screen	0.380662604319667	0.480763117343158
12.2	50% subclinical	Mean incubation 4.5d	detected: arrival risk screen	0.480763117343158	0.501259310079612
12.2	50% subclinical	Mean incubation 4.5d	missed: had both	0.501259310079612	0.506339599274414
12.2	50% subclinical	Mean incubation 4.5d	missed: had fever	0.506339599274414	0.542466100215222
12.2	50% subclinical	Mean incubation 4.5d	missed: had risk awareness	0.542466100215222	0.598874389229784
12.2	50% subclinical	Mean incubation 4.5d	missed: undetectable	0.598874389229784	1
12.3	50% subclinical	Mean incubation 4.5d	detected: departure fever screen	0	0.348190868209943
12.3	50% subclinical	Mean incubation 4.5d	detected: departure risk screen	0.348190868209943	0.380781324799446
12.3	50% subclinical	Mean incubation 4.5d	detected: arrival fever screen	0.380781324799446	0.480860496769297
12.3	50% subclinical	Mean incubation 4.5d	detected: arrival risk screen	0.480860496769297	0.501352845581035
12.3	50% subclinical	Mean incubation 4.5d	missed: had both	0.501352845581035	0.50643205167725
12.3	50% subclinical	Mean incubation 4.5d	missed: had fever	0.50643205167725	0.542550850583662
12.3	50% subclinical	Mean incubation 4.5d	missed: had risk awareness	0.542550850583662	0.598948690922663
12.3	50% subclinical	Mean incubation 4.5d	missed: undetectable	0.598948690922663	1
12.4	50% subclinical	Mean incubation 4.5d	detected: departure fever screen	0	0.348308031406414
12.4	50% subclinical	Mean incubation 4.5d	detected: departure risk screen	0.348308031406414	0.380892629836094
12.4	50% subclinical	Mean incubation 4.5d	detected: arrival fever screen	0.380892629836094	0.480951687640172
12.4	50% subclinical	Mean incubation 4.5d	detected: arrival risk screen	0.480951687640172	0.50144043681227
12.4	50% subclinical	Mean incubation 4.5d	missed: had both	0.50144043681227	0.506518622076763
12.4	50% subclinical	Mean incubation 4.5d	missed: had fever	0.506518622076763	0.542630161735378
12.4	50% subclinical	Mean incubation 4.5d	missed: had risk awareness	0.542630161735378	0.59901822398718
12.4	50% subclinical	Mean incubation 4.5d	missed: undetectable	0.59901822398718	1
12.5	50% subclinical	Mean incubation 4.5d	detected: departure fever screen	0	0.348417854823658
12.5	50% subclinical	Mean incubation 4.5d	detected: departure risk screen	0.348417854823658	0.380996962082475
12.5	50% subclinical	Mean incubation 4.5d	detected: arrival fever screen	0.380996962082475	0.481037068048152
12.5	50% subclinical	Mean incubation 4.5d	detected: arrival risk screen	0.481037068048152	0.501522446940988
12.5	50% subclinical	Mean incubation 4.5d	missed: had both	0.501522446940988	0.506599670364058
12.5	50% subclinical	Mean incubation 4.5d	missed: had fever	0.506599670364058	0.542704370261445
12.5	50% subclinical	Mean incubation 4.5d	missed: had risk awareness	0.542704370261445	0.599083283516883
12.5	50% subclinical	Mean incubation 4.5d	missed: undetectable	0.599083283516883	1
12.6	50% subclinical	Mean incubation 4.5d	detected: departure fever screen	0	0.348520778343173
12.6	50% subclinical	Mean incubation 4.5d	detected: departure risk screen	0.348520778343173	0.381094739426014
12.6	50% subclinical	Mean incubation 4.5d	detected: arrival fever screen	0.381094739426014	0.481116994212234
12.6	50% subclinical	Mean incubation 4.5d	detected: arrival risk screen	0.481116994212234	0.501599218124909
12.6	50% subclinical	Mean incubation 4.5d	missed: had both	0.501599218124909	0.506675535567067
12.6	50% subclinical	Mean incubation 4.5d	missed: had fever	0.506675535567067	0.542773792933523
12.6	50% subclinical	Mean incubation 4.5d	missed: had risk awareness	0.542773792933523	0.59914414722939
12.6	50% subclinical	Mean incubation 4.5d	missed: undetectable	0.59914414722939	1
12.7	50% subclinical	Mean incubation 4.5d	detected: departure fever screen	0	0.348617217093296
12.7	50% subclinical	Mean incubation 4.5d	detected: departure risk screen	0.348617217093296	0.381186356238631
12.7	50% subclinical	Mean incubation 4.5d	detected: arrival fever screen	0.381186356238631	0.481191801643559
12.7	50% subclinical	Mean incubation 4.5d	detected: arrival risk screen	0.481191801643559	0.501671072631313
12.7	50% subclinical	Mean incubation 4.5d	missed: had both	0.501671072631313	0.506746536965774
12.7	50% subclinical	Mean incubation 4.5d	missed: had fever	0.506746536965774	0.542838727788605
12.7	50% subclinical	Mean incubation 4.5d	missed: had risk awareness	0.542838727788605	0.599201076417407
12.7	50% subclinical	Mean incubation 4.5d	missed: undetectable	0.599201076417407	1
12.8	50% subclinical	Mean incubation 4.5d	detected: departure fever screen	0	0.348707562710532
12.8	50% subclinical	Mean incubation 4.5d	detected: departure risk screen	0.348707562710532	0.381272184575005
12.8	50% subclinical	Mean incubation 4.5d	detected: arrival fever screen	0.381272184575005	0.48126180625713
12.8	50% subclinical	Mean incubation 4.5d	detected: arrival risk screen	0.48126180625713	0.501738313904875
12.8	50% subclinical	Mean incubation 4.5d	missed: had both	0.501738313904875	0.506812975155659
12.8	50% subclinical	Mean incubation 4.5d	missed: had fever	0.506812975155659	0.542899455161238
12.8	50% subclinical	Mean incubation 4.5d	missed: had risk awareness	0.542899455161238	0.599254316853688
12.8	50% subclinical	Mean incubation 4.5d	missed: undetectable	0.599254316853688	1
12.9	50% subclinical	Mean incubation 4.5d	detected: departure fever screen	0	0.348792184547655
12.9	50% subclinical	Mean incubation 4.5d	detected: departure risk screen	0.348792184547655	0.381352575320273
12.9	50% subclinical	Mean incubation 4.5d	detected: arrival fever screen	0.381352575320273	0.481327305431493
12.9	50% subclinical	Mean incubation 4.5d	detected: arrival risk screen	0.481327305431493	0.501801227585513
12.9	50% subclinical	Mean incubation 4.5d	missed: had both	0.501801227585513	0.506875133061083
12.9	50% subclinical	Mean incubation 4.5d	missed: had fever	0.506875133061083	0.542956238665133
12.9	50% subclinical	Mean incubation 4.5d	missed: had risk awareness	0.542956238665133	0.599304099651623
12.9	50% subclinical	Mean incubation 4.5d	missed: undetectable	0.599304099651623	1
13	50% subclinical	Mean incubation 4.5d	detected: departure fever screen	0	0.34887143082985
13	50% subclinical	Mean incubation 4.5d	detected: departure risk screen	0.34887143082985	0.381427859288358
13	50% subclinical	Mean incubation 4.5d	detected: arrival fever screen	0.381427859288358	0.481388579018159
13	50% subclinical	Mean incubation 4.5d	detected: arrival risk screen	0.481388579018159	0.501860082477968
13	50% subclinical	Mean incubation 4.5d	missed: had both	0.501860082477968	0.506933276900345
13	50% subclinical	Mean incubation 4.5d	missed: had fever	0.506933276900345	0.543009326126138
13	50% subclinical	Mean incubation 4.5d	missed: had risk awareness	0.543009326126138	0.599350642083189
13	50% subclinical	Mean incubation 4.5d	missed: undetectable	0.599350642083189	1
13.1	50% subclinical	Mean incubation 4.5d	detected: departure fever screen	0	0.34894562976022
13.1	50% subclinical	Mean incubation 4.5d	detected: departure risk screen	0.34894562976022	0.381498348272209
13.1	50% subclinical	Mean incubation 4.5d	detected: arrival fever screen	0.381498348272209	0.481445890302525
13.1	50% subclinical	Mean incubation 4.5d	detected: arrival risk screen	0.481445890302525	0.501915131474793
13.1	50% subclinical	Mean incubation 4.5d	missed: had both	0.501915131474793	0.506987657104152
13.1	50% subclinical	Mean incubation 4.5d	missed: had fever	0.506987657104152	0.543058950468476
13.1	50% subclinical	Mean incubation 4.5d	missed: had risk awareness	0.543058950468476	0.599394148355924
13.1	50% subclinical	Mean incubation 4.5d	missed: undetectable	0.599394148355924	1
13.2	50% subclinical	Mean incubation 4.5d	detected: departure fever screen	0	0.349015090576061
13.2	50% subclinical	Mean incubation 4.5d	detected: departure risk screen	0.349015090576061	0.381564336047258
13.2	50% subclinical	Mean incubation 4.5d	detected: arrival fever screen	0.381564336047258	0.481499486918095
13.2	50% subclinical	Mean incubation 4.5d	detected: arrival risk screen	0.481499486918095	0.501966612434486
13.2	50% subclinical	Mean incubation 4.5d	missed: had both	0.501966612434486	0.507038509189209
13.2	50% subclinical	Mean incubation 4.5d	missed: had fever	0.507038509189209	0.543105330556128
13.2	50% subclinical	Mean incubation 4.5d	missed: had risk awareness	0.543105330556128	0.599434810350578
13.2	50% subclinical	Mean incubation 4.5d	missed: undetectable	0.599434810350578	1
13.3	50% subclinical	Mean incubation 4.5d	detected: departure fever screen	0	0.34908010455733
13.3	50% subclinical	Mean incubation 4.5d	detected: departure risk screen	0.34908010455733	0.381626099329463
13.3	50% subclinical	Mean incubation 4.5d	detected: arrival fever screen	0.381626099329463	0.481549601715731
13.3	50% subclinical	Mean incubation 4.5d	detected: arrival risk screen	0.481549601715731	0.502014749016426
13.3	50% subclinical	Mean incubation 4.5d	missed: had both	0.502014749016426	0.507086054588662
13.3	50% subclinical	Mean incubation 4.5d	missed: had fever	0.507086054588662	0.543148671991224
13.3	50% subclinical	Mean incubation 4.5d	missed: had risk awareness	0.543148671991224	0.599472808321073
13.3	50% subclinical	Mean incubation 4.5d	missed: undetectable	0.599472808321073	1
13.4	50% subclinical	Mean incubation 4.5d	detected: departure fever screen	0	0.349140945988783
13.4	50% subclinical	Mean incubation 4.5d	detected: departure risk screen	0.349140945988783	0.381683898689344
13.4	50% subclinical	Mean incubation 4.5d	detected: arrival fever screen	0.381683898689344	0.481596453589692
13.4	50% subclinical	Mean incubation 4.5d	detected: arrival risk screen	0.481596453589692	0.502059751474309
13.4	50% subclinical	Mean incubation 4.5d	missed: had both	0.502059751474309	0.507130501441056
13.4	50% subclinical	Mean incubation 4.5d	missed: had fever	0.507130501441056	0.543189167871257
13.4	50% subclinical	Mean incubation 4.5d	missed: had risk awareness	0.543189167871257	0.599508311558362
13.4	50% subclinical	Mean incubation 4.5d	missed: undetectable	0.599508311558362	1
13.5	50% subclinical	Mean incubation 4.5d	detected: departure fever screen	0	0.349197873077273
13.5	50% subclinical	Mean incubation 4.5d	detected: departure risk screen	0.349197873077273	0.381737979423409
13.5	50% subclinical	Mean incubation 4.5d	detected: arrival fever screen	0.381737979423409	0.48164024826217
13.5	50% subclinical	Mean incubation 4.5d	detected: arrival risk screen	0.48164024826217	0.502101817409716
13.5	50% subclinical	Mean incubation 4.5d	missed: had both	0.502101817409716	0.507172045339502
13.5	50% subclinical	Mean incubation 4.5d	missed: had fever	0.507172045339502	0.543226999506875
13.5	50% subclinical	Mean incubation 4.5d	missed: had risk awareness	0.543226999506875	0.599541479019726
13.5	50% subclinical	Mean incubation 4.5d	missed: undetectable	0.599541479019726	1
13.6	50% subclinical	Mean incubation 4.5d	detected: departure fever screen	0	0.349251128825716
13.6	50% subclinical	Mean incubation 4.5d	detected: departure risk screen	0.349251128825716	0.38178857238443
13.6	50% subclinical	Mean incubation 4.5d	detected: arrival fever screen	0.38178857238443	0.481681179028019
13.6	50% subclinical	Mean incubation 4.5d	detected: arrival risk screen	0.481681179028019	0.502141132487439
13.6	50% subclinical	Mean incubation 4.5d	missed: had both	0.502141132487439	0.507210870042659
13.6	50% subclinical	Mean incubation 4.5d	missed: had fever	0.507210870042659	0.543262337101999
13.6	50% subclinical	Mean incubation 4.5d	missed: had risk awareness	0.543262337101999	0.59957245992504
13.6	50% subclinical	Mean incubation 4.5d	missed: undetectable	0.59957245992504	1
13.7	50% subclinical	Mean incubation 4.5d	detected: departure fever screen	0	0.349300941865231
13.7	50% subclinical	Mean incubation 4.5d	detected: departure risk screen	0.349300941865231	0.38183589477197
13.7	50% subclinical	Mean incubation 4.5d	detected: arrival fever screen	0.38183589477197	0.481719427461319
13.7	50% subclinical	Mean incubation 4.5d	detected: arrival risk screen	0.481719427461319	0.502177871114162
13.7	50% subclinical	Mean incubation 4.5d	missed: had both	0.502177871114162	0.507247148149148
13.7	50% subclinical	Mean incubation 4.5d	missed: had fever	0.507247148149148	0.543295340397935
13.7	50% subclinical	Mean incubation 4.5d	missed: had risk awareness	0.543295340397935	0.599601394321478
13.7	50% subclinical	Mean incubation 4.5d	missed: undetectable	0.599601394321478	1
13.8	50% subclinical	Mean incubation 4.5d	detected: departure fever screen	0	0.349347527246977
13.8	50% subclinical	Mean incubation 4.5d	detected: departure risk screen	0.349347527246977	0.381880150884628
13.8	50% subclinical	Mean incubation 4.5d	detected: arrival fever screen	0.381880150884628	0.481755164085414
13.8	50% subclinical	Mean incubation 4.5d	detected: arrival risk screen	0.481755164085414	0.502212197082043
13.8	50% subclinical	Mean incubation 4.5d	missed: had both	0.502212197082043	0.50728104173697
13.8	50% subclinical	Mean incubation 4.5d	missed: had fever	0.50728104173697	0.543326159283118
13.8	50% subclinical	Mean incubation 4.5d	missed: had risk awareness	0.543326159283118	0.599628413618076
13.8	50% subclinical	Mean incubation 4.5d	missed: undetectable	0.599628413618076	1
13.9	50% subclinical	Mean incubation 4.5d	detected: departure fever screen	0	0.34939108719517
13.9	50% subclinical	Mean incubation 4.5d	detected: departure risk screen	0.34939108719517	0.381921532835411
13.9	50% subclinical	Mean incubation 4.5d	detected: arrival fever screen	0.381921532835411	0.481788549007984
13.9	50% subclinical	Mean incubation 4.5d	detected: arrival risk screen	0.481788549007984	0.502244264178721
13.9	50% subclinical	Mean incubation 4.5d	missed: had both	0.502244264178721	0.507312702969435
13.9	50% subclinical	Mean incubation 4.5d	missed: had fever	0.507312702969435	0.543354934370062
13.9	50% subclinical	Mean incubation 4.5d	missed: had risk awareness	0.543354934370062	0.599653641091561
13.9	50% subclinical	Mean incubation 4.5d	missed: undetectable	0.599653641091561	1
14	50% subclinical	Mean incubation 4.5d	detected: departure fever screen	0	0.349431811822791
14	50% subclinical	Mean incubation 4.5d	detected: departure risk screen	0.349431811822791	0.381960221231651
14	50% subclinical	Mean incubation 4.5d	detected: arrival fever screen	0.381960221231651	0.481819732522709
14	50% subclinical	Mean incubation 4.5d	detected: arrival risk screen	0.481819732522709	0.502274216765233
14	50% subclinical	Mean incubation 4.5d	missed: had both	0.502274216765233	0.507342274669103
14	50% subclinical	Mean incubation 4.5d	missed: had fever	0.507342274669103	0.543381797541063
14	50% subclinical	Mean incubation 4.5d	missed: had risk awareness	0.543381797541063	0.599677192364768
14	50% subclinical	Mean incubation 4.5d	missed: undetectable	0.599677192364768	1
14.1	50% subclinical	Mean incubation 4.5d	detected: departure fever screen	0	0.349469879811434
14.1	50% subclinical	Mean incubation 4.5d	detected: departure risk screen	0.349469879811434	0.381996385820862
14.1	50% subclinical	Mean incubation 4.5d	detected: arrival fever screen	0.381996385820862	0.481848855679016
14.1	50% subclinical	Mean incubation 4.5d	detected: arrival risk screen	0.481848855679016	0.502302190323265
14.1	50% subclinical	Mean incubation 4.5d	missed: had both	0.502302190323265	0.507369890861179
14.1	50% subclinical	Mean incubation 4.5d	missed: had fever	0.507369890861179	0.543406872464122
14.1	50% subclinical	Mean incubation 4.5d	missed: had risk awareness	0.543406872464122	0.599699175858956
14.1	50% subclinical	Mean incubation 4.5d	missed: undetectable	0.599699175858956	1
14.2	50% subclinical	Mean incubation 4.5d	detected: departure fever screen	0	0.349505459056755
14.2	50% subclinical	Mean incubation 4.5d	detected: departure risk screen	0.349505459056755	0.382030186103918
14.2	50% subclinical	Mean incubation 4.5d	detected: arrival fever screen	0.382030186103918	0.481876050821365
14.2	50% subclinical	Mean incubation 4.5d	detected: arrival risk screen	0.481876050821365	0.502328311973153
14.2	50% subclinical	Mean incubation 4.5d	missed: had both	0.502328311973153	0.507395677287761
14.2	50% subclinical	Mean incubation 4.5d	missed: had fever	0.507395677287761	0.543430275080524
14.2	50% subclinical	Mean incubation 4.5d	missed: had risk awareness	0.543430275080524	0.599719693221281
14.2	50% subclinical	Mean incubation 4.5d	missed: undetectable	0.599719693221281	1
14.3	50% subclinical	Mean incubation 4.5d	detected: departure fever screen	0	0.349538707280939
14.3	50% subclinical	Mean incubation 4.5d	detected: departure risk screen	0.349538707280939	0.382061771916892
14.3	50% subclinical	Mean incubation 4.5d	detected: arrival fever screen	0.382061771916892	0.481901442099476
14.3	50% subclinical	Mean incubation 4.5d	detected: arrival risk screen	0.481901442099476	0.502352700963971
14.3	50% subclinical	Mean incubation 4.5d	missed: had both	0.502352700963971	0.50741975189429
14.3	50% subclinical	Mean incubation 4.5d	missed: had fever	0.50741975189429	0.543452114065448
14.3	50% subclinical	Mean incubation 4.5d	missed: had risk awareness	0.543452114065448	0.599738839728612
14.3	50% subclinical	Mean incubation 4.5d	missed: undetectable	0.599738839728612	1
14.4	50% subclinical	Mean incubation 4.5d	detected: departure fever screen	0	0.349569772613567
14.4	50% subclinical	Mean incubation 4.5d	detected: departure risk screen	0.349569772613567	0.382091283982889
14.4	50% subclinical	Mean incubation 4.5d	detected: arrival fever screen	0.382091283982889	0.481925145950872
14.4	50% subclinical	Mean incubation 4.5d	detected: arrival risk screen	0.481925145950872	0.502375469137022
14.4	50% subclinical	Mean incubation 4.5d	missed: had both	0.502375469137022	0.507442225289533
14.4	50% subclinical	Mean incubation 4.5d	missed: had fever	0.507442225289533	0.54347249126294
14.4	50% subclinical	Mean incubation 4.5d	missed: had risk awareness	0.54347249126294	0.599756704668879
14.4	50% subclinical	Mean incubation 4.5d	missed: undetectable	0.599756704668879	1
14.5	50% subclinical	Mean incubation 4.5d	detected: departure fever screen	0	0.34959879414226
14.5	50% subclinical	Mean incubation 4.5d	detected: departure risk screen	0.34959879414226	0.382118854435147
14.5	50% subclinical	Mean incubation 4.5d	detected: arrival fever screen	0.382118854435147	0.481947271557045
14.5	50% subclinical	Mean incubation 4.5d	detected: arrival risk screen	0.481947271557045	0.502396721364004
14.5	50% subclinical	Mean incubation 4.5d	missed: had both	0.502396721364004	0.507463201180341
14.5	50% subclinical	Mean incubation 4.5d	missed: had fever	0.507463201180341	0.543491502096515
14.5	50% subclinical	Mean incubation 4.5d	missed: had risk awareness	0.543491502096515	0.599773371701054
14.5	50% subclinical	Mean incubation 4.5d	missed: undetectable	0.599773371701054	1
14.6	50% subclinical	Mean incubation 4.5d	detected: departure fever screen	0	0.34962590243441
14.6	50% subclinical	Mean incubation 4.5d	detected: departure risk screen	0.34962590243441	0.38214460731269
14.6	50% subclinical	Mean incubation 4.5d	detected: arrival fever screen	0.38214460731269	0.481967921274522
14.6	50% subclinical	Mean incubation 4.5d	detected: arrival risk screen	0.481967921274522	0.502416555961054
14.6	50% subclinical	Mean incubation 4.5d	missed: had both	0.502416555961054	0.507482776782425
14.6	50% subclinical	Mean incubation 4.5d	missed: had fever	0.507482776782425	0.54350923595662
14.6	50% subclinical	Mean incubation 4.5d	missed: had risk awareness	0.54350923595662	0.599788919194845
14.6	50% subclinical	Mean incubation 4.5d	missed: undetectable	0.599788919194845	1
14.7	50% subclinical	Mean incubation 4.5d	detected: departure fever screen	0	0.349651220031293
14.7	50% subclinical	Mean incubation 4.5d	detected: departure risk screen	0.349651220031293	0.382168659029728
14.7	50% subclinical	Mean incubation 4.5d	detected: arrival fever screen	0.382168659029728	0.481987191042048
14.7	50% subclinical	Mean incubation 4.5d	detected: arrival risk screen	0.481987191042048	0.502435065079862
14.7	50% subclinical	Mean incubation 4.5d	missed: had both	0.502435065079862	0.507501043208307
14.7	50% subclinical	Mean incubation 4.5d	missed: had fever	0.507501043208307	0.543525776566137
14.7	50% subclinical	Mean incubation 4.5d	missed: had risk awareness	0.543525776566137	0.599803420551134
14.7	50% subclinical	Mean incubation 4.5d	missed: undetectable	0.599803420551134	1
14.8	50% subclinical	Mean incubation 4.5d	detected: departure fever screen	0	0.349674861915817
14.8	50% subclinical	Mean incubation 4.5d	detected: departure risk screen	0.349674861915817	0.382191118820026
14.8	50% subclinical	Mean incubation 4.5d	detected: arrival fever screen	0.382191118820026	0.48200517076508
14.8	50% subclinical	Mean incubation 4.5d	detected: arrival risk screen	0.48200517076508	0.502452335076984
14.8	50% subclinical	Mean incubation 4.5d	missed: had both	0.502452335076984	0.507518085833594
14.8	50% subclinical	Mean incubation 4.5d	missed: had fever	0.507518085833594	0.543541202325042
14.8	50% subclinical	Mean incubation 4.5d	missed: had risk awareness	0.543541202325042	0.599816944504147
14.8	50% subclinical	Mean incubation 4.5d	missed: undetectable	0.599816944504147	1
14.9	50% subclinical	Mean incubation 4.5d	detected: departure fever screen	0	0.349696935955116
14.9	50% subclinical	Mean incubation 4.5d	detected: departure risk screen	0.349696935955116	0.38221208915736
14.9	50% subclinical	Mean incubation 4.5d	detected: arrival fever screen	0.38221208915736	0.482021944678695
14.9	50% subclinical	Mean incubation 4.5d	detected: arrival risk screen	0.482021944678695	0.502468446862431
14.9	50% subclinical	Mean incubation 4.5d	missed: had both	0.502468446862431	0.507533984642649
14.9	50% subclinical	Mean incubation 4.5d	missed: had fever	0.507533984642649	0.543555586635311
14.9	50% subclinical	Mean incubation 4.5d	missed: had risk awareness	0.543555586635311	0.5998295554063
14.9	50% subclinical	Mean incubation 4.5d	missed: undetectable	0.5998295554063	1
15	50% subclinical	Mean incubation 4.5d	detected: departure fever screen	0	0.349717543319172
15	50% subclinical	Mean incubation 4.5d	detected: departure risk screen	0.349717543319172	0.382231666153213
15	50% subclinical	Mean incubation 4.5d	detected: arrival fever screen	0.382231666153213	0.482037591690039
15	50% subclinical	Mean incubation 4.5d	detected: arrival risk screen	0.482037591690039	0.50248347622859
15	50% subclinical	Mean incubation 4.5d	missed: had both	0.50248347622859	0.507548814554707
15	50% subclinical	Mean incubation 4.5d	missed: had fever	0.507548814554707	0.543568998207096
15	50% subclinical	Mean incubation 4.5d	missed: had risk awareness	0.543568998207096	0.599841313496632
15	50% subclinical	Mean incubation 4.5d	missed: undetectable	0.599841313496632	1
0	25% subclinical	Mean incubation 4.5d	detected: departure fever screen	0	0
0	25% subclinical	Mean incubation 4.5d	detected: departure risk screen	0	0.05
0	25% subclinical	Mean incubation 4.5d	detected: arrival fever screen	0.05	0.0564423271925907
0	25% subclinical	Mean incubation 4.5d	detected: arrival risk screen	0.0564423271925907	0.0936880248034095
0	25% subclinical	Mean incubation 4.5d	missed: had both	0.0936880248034095	0.0940149850180711
0	25% subclinical	Mean incubation 4.5d	missed: had fever	0.0940149850180711	0.0963400354334422
0	25% subclinical	Mean incubation 4.5d	missed: had risk awareness	0.0963400354334422	0.207750168051237
0	25% subclinical	Mean incubation 4.5d	missed: undetectable	0.207750168051237	1
0.1	25% subclinical	Mean incubation 4.5d	detected: departure fever screen	0	1.27204007725366e-06
0.1	25% subclinical	Mean incubation 4.5d	detected: departure risk screen	1.27204007725366e-06	0.0500012084380734
0.1	25% subclinical	Mean incubation 4.5d	detected: arrival fever screen	0.0500012084380734	0.0588061947438803
0.1	25% subclinical	Mean incubation 4.5d	detected: arrival risk screen	0.0588061947438803	0.095958581793464
0.1	25% subclinical	Mean incubation 4.5d	missed: had both	0.095958581793464	0.0964054513992098
0.1	25% subclinical	Mean incubation 4.5d	missed: had fever	0.0964054513992098	0.0995831908178469
0.1	25% subclinical	Mean incubation 4.5d	missed: had risk awareness	0.0995831908178469	0.210593482360852
0.1	25% subclinical	Mean incubation 4.5d	missed: undetectable	0.210593482360852	1
0.2	25% subclinical	Mean incubation 4.5d	detected: departure fever screen	0	1.89616666608631e-05
0.2	25% subclinical	Mean incubation 4.5d	detected: departure risk screen	1.89616666608631e-05	0.0500180135833278
0.2	25% subclinical	Mean incubation 4.5d	detected: arrival fever screen	0.0500180135833278	0.0616517334029547
0.2	25% subclinical	Mean incubation 4.5d	detected: arrival risk screen	0.0616517334029547	0.0986917965581012
0.2	25% subclinical	Mean incubation 4.5d	missed: had both	0.0986917965581012	0.0992822297068417
0.2	25% subclinical	Mean incubation 4.5d	missed: had fever	0.0992822297068417	0.103480865431218
0.2	25% subclinical	Mean incubation 4.5d	missed: had risk awareness	0.103480865431218	0.214010621747917
0.2	25% subclinical	Mean incubation 4.5d	missed: undetectable	0.214010621747917	1
0.3	25% subclinical	Mean incubation 4.5d	detected: departure fever screen	0	8.94523173412416e-05
0.3	25% subclinical	Mean incubation 4.5d	detected: departure risk screen	8.94523173412416e-05	0.0500849797014742
0.3	25% subclinical	Mean incubation 4.5d	detected: arrival fever screen	0.0500849797014742	0.0650089136584281
0.3	25% subclinical	Mean incubation 4.5d	detected: arrival risk screen	0.0650089136584281	0.101916456540332
0.3	25% subclinical	Mean incubation 4.5d	missed: had both	0.101916456540332	0.102673874241155
0.3	25% subclinical	Mean incubation 4.5d	missed: had fever	0.102673874241155	0.108059955669229
0.3	25% subclinical	Mean incubation 4.5d	missed: had risk awareness	0.108059955669229	0.218025166614118
0.3	25% subclinical	Mean incubation 4.5d	missed: undetectable	0.218025166614118	1
0.4	25% subclinical	Mean incubation 4.5d	detected: departure fever screen	0	0.000263507112641363
0.4	25% subclinical	Mean incubation 4.5d	detected: departure risk screen	0.000263507112641363	0.0502503317570093
0.4	25% subclinical	Mean incubation 4.5d	detected: arrival fever screen	0.0502503317570093	0.0689043782461153
0.4	25% subclinical	Mean incubation 4.5d	detected: arrival risk screen	0.0689043782461153	0.105658152789032
0.4	25% subclinical	Mean incubation 4.5d	missed: had both	0.105658152789032	0.106604880712351
0.4	25% subclinical	Mean incubation 4.5d	missed: had fever	0.106604880712351	0.113337168167066
0.4	25% subclinical	Mean incubation 4.5d	missed: had risk awareness	0.113337168167066	0.222651763872496
0.4	25% subclinical	Mean incubation 4.5d	missed: undetectable	0.222651763872496	1
0.5	25% subclinical	Mean incubation 4.5d	detected: departure fever screen	0	0.000599757075926377
0.5	25% subclinical	Mean incubation 4.5d	detected: departure risk screen	0.000599757075926377	0.0505697692221301
0.5	25% subclinical	Mean incubation 4.5d	detected: arrival fever screen	0.0505697692221301	0.0733599643207244
0.5	25% subclinical	Mean incubation 4.5d	detected: arrival risk screen	0.0733599643207244	0.109937860465959
0.5	25% subclinical	Mean incubation 4.5d	missed: had both	0.109937860465959	0.111094505705925
0.5	25% subclinical	Mean incubation 4.5d	missed: had fever	0.111094505705925	0.119319538523463
0.5	25% subclinical	Mean incubation 4.5d	missed: had risk awareness	0.119319538523463	0.2278965817192
0.5	25% subclinical	Mean incubation 4.5d	missed: undetectable	0.2278965817192	1
0.6	25% subclinical	Mean incubation 4.5d	detected: departure fever screen	0	0.00115969019795703
0.6	25% subclinical	Mean incubation 4.5d	detected: departure risk screen	0.00115969019795703	0.0511017056880592
0.6	25% subclinical	Mean incubation 4.5d	detected: arrival fever screen	0.0511017056880592	0.0783917738726389
0.6	25% subclinical	Mean incubation 4.5d	detected: arrival risk screen	0.0783917738726389	0.114771045956614
0.6	25% subclinical	Mean incubation 4.5d	missed: had both	0.114771045956614	0.116156068214102
0.6	25% subclinical	Mean incubation 4.5d	missed: had fever	0.116156068214102	0.126005115378461
0.6	25% subclinical	Mean incubation 4.5d	missed: had risk awareness	0.126005115378461	0.233757909372898
0.6	25% subclinical	Mean incubation 4.5d	missed: undetectable	0.233757909372898	1
0.7	25% subclinical	Mean incubation 4.5d	detected: departure fever screen	0	0.00200387608490345
0.7	25% subclinical	Mean incubation 4.5d	detected: departure risk screen	0.00200387608490345	0.0519036822806583
0.7	25% subclinical	Mean incubation 4.5d	detected: arrival fever screen	0.0519036822806583	0.0840096766356519
0.7	25% subclinical	Mean incubation 4.5d	detected: arrival risk screen	0.0840096766356519	0.120167189400034
0.7	25% subclinical	Mean incubation 4.5d	missed: had both	0.120167189400034	0.121796628963163
0.7	25% subclinical	Mean incubation 4.5d	missed: had fever	0.121796628963163	0.133383754745417
0.7	25% subclinical	Mean incubation 4.5d	missed: had risk awareness	0.133383754745417	0.240226853475434
0.7	25% subclinical	Mean incubation 4.5d	missed: undetectable	0.240226853475434	1
0.8	25% subclinical	Mean incubation 4.5d	detected: departure fever screen	0	0.00318920130451023
0.8	25% subclinical	Mean incubation 4.5d	detected: departure risk screen	0.00318920130451023	0.0530297412392847
0.8	25% subclinical	Mean incubation 4.5d	detected: arrival fever screen	0.0530297412392847	0.0902171491276077
0.8	25% subclinical	Mean incubation 4.5d	detected: arrival risk screen	0.0902171491276077	0.126129630083097
0.8	25% subclinical	Mean incubation 4.5d	missed: had both	0.126129630083097	0.128016960934572
0.8	25% subclinical	Mean incubation 4.5d	missed: had fever	0.128016960934572	0.141437980322839
0.8	25% subclinical	Mean incubation 4.5d	missed: had risk awareness	0.141437980322839	0.247288092337831
0.8	25% subclinical	Mean incubation 4.5d	missed: undetectable	0.247288092337831	1
0.9	25% subclinical	Mean incubation 4.5d	detected: departure fever screen	0	0.00476692534508085
0.9	25% subclinical	Mean incubation 4.5d	detected: departure risk screen	0.00476692534508085	0.0545285790778268
0.9	25% subclinical	Mean incubation 4.5d	detected: arrival fever screen	0.0545285790778268	0.0970113700154653
0.9	25% subclinical	Mean incubation 4.5d	detected: arrival risk screen	0.0970113700154653	0.132655658041171
0.9	25% subclinical	Mean incubation 4.5d	missed: had both	0.132655658041171	0.134811739536126
0.9	25% subclinical	Mean incubation 4.5d	missed: had fever	0.134811739536126	0.150143874611364
0.9	25% subclinical	Mean incubation 4.5d	missed: had risk awareness	0.150143874611364	0.254920657193525
0.9	25% subclinical	Mean incubation 4.5d	missed: undetectable	0.254920657193525	1
1	25% subclinical	Mean incubation 4.5d	detected: departure fever screen	0	0.00678139704483235
1	25% subclinical	Mean incubation 4.5d	detected: departure risk screen	0.00678139704483235	0.0564423271925907
1	25% subclinical	Mean incubation 4.5d	detected: arrival fever screen	0.0564423271925907	0.104383506082075
1	25% subclinical	Mean incubation 4.5d	detected: arrival risk screen	0.104383506082075	0.13973678873673
1	25% subclinical	Mean incubation 4.5d	missed: had both	0.13973678873673	0.142169893680369
1	25% subclinical	Mean incubation 4.5d	missed: had fever	0.142169893680369	0.159471973279581
1	25% subclinical	Mean incubation 4.5d	missed: had risk awareness	0.159471973279581	0.263098716299907
1	25% subclinical	Mean incubation 4.5d	missed: undetectable	0.263098716299907	1
1.1	25% subclinical	Mean incubation 4.5d	detected: departure fever screen	0	0.00926929706574554
1.1	25% subclinical	Mean incubation 4.5d	detected: departure risk screen	0.00926929706574554	0.0588058322124583
1.1	25% subclinical	Mean incubation 4.5d	detected: arrival fever screen	0.0588058322124583	0.11231913502836
1.1	25% subclinical	Mean incubation 4.5d	detected: arrival risk screen	0.11231913502836	0.147359169171978
1.1	25% subclinical	Mean incubation 4.5d	missed: had both	0.147359169171978	0.1500750698788
1.1	25% subclinical	Mean incubation 4.5d	missed: had fever	0.1500750698788	0.169388141571757
1.1	25% subclinical	Mean incubation 4.5d	missed: had risk awareness	0.169388141571757	0.271792343295787
1.1	25% subclinical	Mean incubation 4.5d	missed: undetectable	0.271792343295787	1
1.2	25% subclinical	Mean incubation 4.5d	detected: departure fever screen	0	0.0122592940294277
1.2	25% subclinical	Mean incubation 4.5d	detected: departure risk screen	0.0122592940294277	0.0616463293279563
1.2	25% subclinical	Mean incubation 4.5d	detected: arrival fever screen	0.0616463293279563	0.120798761463502
1.2	25% subclinical	Mean incubation 4.5d	detected: arrival risk screen	0.120798761463502	0.155504073510995
1.2	25% subclinical	Mean incubation 4.5d	missed: had both	0.155504073510995	0.158506170630656
1.2	25% subclinical	Mean incubation 4.5d	missed: had fever	0.158506170630656	0.179854416814913
1.2	25% subclinical	Mean incubation 4.5d	missed: had risk awareness	0.179854416814913	0.280968255837732
1.2	25% subclinical	Mean incubation 4.5d	missed: undetectable	0.280968255837732	1
1.3	25% subclinical	Mean incubation 4.5d	detected: departure fever screen	0	0.0157720207873535
1.3	25% subclinical	Mean incubation 4.5d	detected: departure risk screen	0.0157720207873535	0.0649834197479859
1.3	25% subclinical	Mean incubation 4.5d	detected: arrival fever screen	0.0649834197479859	0.129798390971647
1.3	25% subclinical	Mean incubation 4.5d	detected: arrival risk screen	0.129798390971647	0.164148454485924
1.3	25% subclinical	Mean incubation 4.5d	missed: had both	0.164148454485924	0.167437936108177
1.3	25% subclinical	Mean incubation 4.5d	missed: had fever	0.167437936108177	0.190829805421979
1.3	25% subclinical	Mean incubation 4.5d	missed: had risk awareness	0.190829805421979	0.290590514342557
1.3	25% subclinical	Mean incubation 4.5d	missed: undetectable	0.290590514342557	1
1.4	25% subclinical	Mean incubation 4.5d	detected: departure fever screen	0	0.0198202933884342
1.4	25% subclinical	Mean incubation 4.5d	detected: departure risk screen	0.0198202933884342	0.0688292787190125
1.4	25% subclinical	Mean incubation 4.5d	detected: arrival fever screen	0.0688292787190125	0.139290134318328
1.4	25% subclinical	Mean incubation 4.5d	detected: arrival risk screen	0.139290134318328	0.173265523753131
1.4	25% subclinical	Mean incubation 4.5d	missed: had both	0.173265523753131	0.176841544620013
1.4	25% subclinical	Mean incubation 4.5d	missed: had fever	0.176841544620013	0.202271026340067
1.4	25% subclinical	Mean incubation 4.5d	missed: had risk awareness	0.202271026340067	0.300621173777593
1.4	25% subclinical	Mean incubation 4.5d	missed: undetectable	0.300621173777593	1
1.5	25% subclinical	Mean incubation 4.5d	detected: departure fever screen	0	0.0244095090043004
1.5	25% subclinical	Mean incubation 4.5d	detected: departure risk screen	0.0244095090043004	0.0731890335540853
1.5	25% subclinical	Mean incubation 4.5d	detected: arrival fever screen	0.0731890335540853	0.149242819866021
1.5	25% subclinical	Mean incubation 4.5d	detected: arrival risk screen	0.149242819866021	0.182825340134468
1.5	25% subclinical	Mean incubation 4.5d	missed: had both	0.182825340134468	0.186685212748043
1.5	25% subclinical	Mean incubation 4.5d	missed: had fever	0.186685212748043	0.214133195777915
1.5	25% subclinical	Mean incubation 4.5d	missed: had risk awareness	0.214133195777915	0.311020883969679
1.5	25% subclinical	Mean incubation 4.5d	missed: undetectable	0.311020883969679	1
1.6	25% subclinical	Mean incubation 4.5d	detected: departure fever screen	0	0.0295381707012854
1.6	25% subclinical	Mean incubation 4.5d	detected: departure risk screen	0.0295381707012854	0.0780612621662211
1.6	25% subclinical	Mean incubation 4.5d	detected: arrival fever screen	0.0780612621662211	0.159622597273775
1.6	25% subclinical	Mean incubation 4.5d	detected: arrival risk screen	0.159622597273775	0.192795389486652
1.6	25% subclinical	Mean incubation 4.5d	missed: had both	0.192795389486652	0.196934780554141
1.6	25% subclinical	Mean incubation 4.5d	missed: had fever	0.196934780554141	0.226370450367394
1.6	25% subclinical	Mean incubation 4.5d	missed: had risk awareness	0.226370450367394	0.321749435938537
1.6	25% subclinical	Mean incubation 4.5d	missed: undetectable	0.321749435938537	1
1.7	25% subclinical	Mean incubation 4.5d	detected: departure fever screen	0	0.0351984967910047
1.7	25% subclinical	Mean incubation 4.5d	detected: departure risk screen	0.0351984967910047	0.0834385719514544
1.7	25% subclinical	Mean incubation 4.5d	detected: arrival fever screen	0.0834385719514544	0.170393519706073
1.7	25% subclinical	Mean incubation 4.5d	detected: arrival risk screen	0.170393519706073	0.203141143928202
1.7	25% subclinical	Mean incubation 4.5d	missed: had both	0.203141143928202	0.207554270975899
1.7	25% subclinical	Mean incubation 4.5d	missed: had fever	0.207554270975899	0.238936507759521
1.7	25% subclinical	Mean incubation 4.5d	missed: had risk awareness	0.238936507759521	0.33276625337821
1.7	25% subclinical	Mean incubation 4.5d	missed: undetectable	0.33276625337821	1
1.8	25% subclinical	Mean incubation 4.5d	detected: departure fever screen	0	0.0413770807956024
1.8	25% subclinical	Mean incubation 4.5d	detected: departure risk screen	0.0413770807956024	0.0893082267558223
1.8	25% subclinical	Mean incubation 4.5d	detected: arrival fever screen	0.0893082267558223	0.181518095197139
1.8	25% subclinical	Mean incubation 4.5d	detected: arrival risk screen	0.181518095197139	0.213826591439357
1.8	25% subclinical	Mean incubation 4.5d	missed: had both	0.213826591439357	0.218506415589574
1.8	25% subclinical	Mean incubation 4.5d	missed: had fever	0.218506415589574	0.25178516510223
1.8	25% subclinical	Mean incubation 4.5d	missed: had risk awareness	0.25178516510223	0.344030829678667
1.8	25% subclinical	Mean incubation 4.5d	missed: undetectable	0.344030829678667	1
1.9	25% subclinical	Mean incubation 4.5d	detected: departure fever screen	0	0.0480555750443339
1.9	25% subclinical	Mean incubation 4.5d	detected: departure risk screen	0.0480555750443339	0.0956527962921173
1.9	25% subclinical	Mean incubation 4.5d	detected: arrival fever screen	0.0956527962921173	0.192957800617969
1.9	25% subclinical	Mean incubation 4.5d	detected: arrival risk screen	0.192957800617969	0.224814729540944
1.9	25% subclinical	Mean incubation 4.5d	missed: had both	0.224814729540944	0.229753141414625
1.9	25% subclinical	Mean incubation 4.5d	missed: had fever	0.229753141414625	0.264870736960797
1.9	25% subclinical	Mean incubation 4.5d	missed: had risk awareness	0.264870736960797	0.355503111856041
1.9	25% subclinical	Mean incubation 4.5d	missed: undetectable	0.355503111856041	1
2	25% subclinical	Mean incubation 4.5d	detected: departure fever screen	0	0.0552113767624186
2	25% subclinical	Mean incubation 4.5d	detected: departure risk screen	0.0552113767624186	0.102450807924298
2	25% subclinical	Mean incubation 4.5d	detected: arrival fever screen	0.102450807924298	0.20467355396877
2	25% subclinical	Mean incubation 4.5d	detected: arrival risk screen	0.20467355396877	0.236068018943687
2	25% subclinical	Mean incubation 4.5d	missed: had both	0.236068018943687	0.241256015453463
2	25% subclinical	Mean incubation 4.5d	missed: had fever	0.241256015453463	0.278148435078535
2	25% subclinical	Mean incubation 4.5d	missed: had risk awareness	0.278148435078535	0.36714383349351
2	25% subclinical	Mean incubation 4.5d	missed: undetectable	0.36714383349351	1
2.1	25% subclinical	Mean incubation 4.5d	detected: departure fever screen	0	0.0628183003838135
2.1	25% subclinical	Mean incubation 4.5d	detected: departure risk screen	0.0628183003838135	0.109677385364623
2.1	25% subclinical	Mean incubation 4.5d	detected: arrival fever screen	0.109677385364623	0.216626142550604
2.1	25% subclinical	Mean incubation 4.5d	detected: arrival risk screen	0.216626142550604	0.247548794818343
2.1	25% subclinical	Mean incubation 4.5d	missed: had both	0.247548794818343	0.25297664527703
2.1	25% subclinical	Mean incubation 4.5d	missed: had fever	0.25297664527703	0.291574692983249
2.1	25% subclinical	Mean incubation 4.5d	missed: had risk awareness	0.291574692983249	0.37891479932778
2.1	25% subclinical	Mean incubation 4.5d	missed: undetectable	0.37891479932778	1
2.2	25% subclinical	Mean incubation 4.5d	detected: departure fever screen	0	0.0708472238580155
2.2	25% subclinical	Mean incubation 4.5d	detected: departure risk screen	0.0708472238580155	0.117304862665115
2.2	25% subclinical	Mean incubation 4.5d	detected: arrival fever screen	0.117304862665115	0.22877660602707
2.2	25% subclinical	Mean incubation 4.5d	detected: arrival risk screen	0.22877660602707	0.259219634736528
2.2	25% subclinical	Mean incubation 4.5d	missed: had both	0.259219634736528	0.264877035245499
2.2	25% subclinical	Mean incubation 4.5d	missed: had fever	0.264877035245499	0.305107438864852
2.2	25% subclinical	Mean incubation 4.5d	missed: had risk awareness	0.305107438864852	0.390779124484254
2.2	25% subclinical	Mean incubation 4.5d	missed: undetectable	0.390779124484254	1
2.3	25% subclinical	Mean incubation 4.5d	detected: departure fever screen	0	0.0792667000497377
2.3	25% subclinical	Mean incubation 4.5d	detected: departure risk screen	0.0792667000497377	0.125303365047251
2.3	25% subclinical	Mean incubation 4.5d	detected: arrival fever screen	0.125303365047251	0.241086574529985
2.3	25% subclinical	Mean incubation 4.5d	detected: arrival risk screen	0.241086574529985	0.271043683430117
2.3	25% subclinical	Mean incubation 4.5d	missed: had both	0.271043683430117	0.276919898948978
2.3	25% subclinical	Mean incubation 4.5d	missed: had fever	0.276919898948978	0.318706320416431
2.3	25% subclinical	Mean incubation 4.5d	missed: had risk awareness	0.318706320416431	0.402701431597967
2.3	25% subclinical	Mean incubation 4.5d	missed: undetectable	0.402701431597967	1
2.4	25% subclinical	Mean incubation 4.5d	detected: departure fever screen	0	0.0880435270553939
2.4	25% subclinical	Mean incubation 4.5d	detected: departure risk screen	0.0880435270553939	0.133641350702624
2.4	25% subclinical	Mean incubation 4.5d	detected: arrival fever screen	0.133641350702624	0.25351856284408
2.4	25% subclinical	Mean incubation 4.5d	detected: arrival risk screen	0.25351856284408	0.282984935363393
2.4	25% subclinical	Mean incubation 4.5d	missed: had both	0.282984935363393	0.289068929212677
2.4	25% subclinical	Mean incubation 4.5d	missed: had fever	0.289068929212677	0.332332885474256
2.4	25% subclinical	Mean incubation 4.5d	missed: had risk awareness	0.332332885474256	0.414648009182909
2.4	25% subclinical	Mean incubation 4.5d	missed: undetectable	0.414648009182909	1
2.5	25% subclinical	Mean incubation 4.5d	detected: departure fever screen	0	0.0971432734734688
2.5	25% subclinical	Mean incubation 4.5d	detected: departure risk screen	0.0971432734734688	0.142286109799795
2.5	25% subclinical	Mean incubation 4.5d	detected: arrival fever screen	0.142286109799795	0.26603622236897
2.5	25% subclinical	Mean incubation 4.5d	detected: arrival risk screen	0.26603622236897	0.295008476749142
2.5	25% subclinical	Mean incubation 4.5d	missed: had both	0.295008476749142	0.301289027575022
2.5	25% subclinical	Mean incubation 4.5d	missed: had fever	0.301289027575022	0.345950722336829
2.5	25% subclinical	Mean incubation 4.5d	missed: had risk awareness	0.345950722336829	0.426586934651467
2.5	25% subclinical	Mean incubation 4.5d	missed: undetectable	0.426586934651467	1
2.6	25% subclinical	Mean incubation 4.5d	detected: departure fever screen	0	0.10653075644622
2.6	25% subclinical	Mean incubation 4.5d	detected: departure risk screen	0.10653075644622	0.151204218623909
2.6	25% subclinical	Mean incubation 4.5d	detected: arrival fever screen	0.151204218623909	0.278604553039901
2.6	25% subclinical	Mean incubation 4.5d	detected: arrival risk screen	0.278604553039901	0.307080689104115
2.6	25% subclinical	Mean incubation 4.5d	missed: had both	0.307080689104115	0.31354649555004
2.6	25% subclinical	Mean incubation 4.5d	missed: had fever	0.31354649555004	0.359525563609947
2.6	25% subclinical	Mean incubation 4.5d	missed: had risk awareness	0.359525563609947	0.438488165356666
2.6	25% subclinical	Mean incubation 4.5d	missed: undetectable	0.438488165356666	1
2.7	25% subclinical	Mean incubation 4.5d	detected: departure fever screen	0	0.116170471705934
2.7	25% subclinical	Mean incubation 4.5d	detected: departure risk screen	0.116170471705934	0.160361948120637
2.7	25% subclinical	Mean incubation 4.5d	detected: arrival fever screen	0.160361948120637	0.291190077724345
2.7	25% subclinical	Mean incubation 4.5d	detected: arrival risk screen	0.291190077724345	0.319169416761542
2.7	25% subclinical	Mean incubation 4.5d	missed: had both	0.319169416761542	0.325809190256467
2.7	25% subclinical	Mean incubation 4.5d	missed: had fever	0.325809190256467	0.373025357331489
2.7	25% subclinical	Mean incubation 4.5d	missed: had risk awareness	0.373025357331489	0.450323600948155
2.7	25% subclinical	Mean incubation 4.5d	missed: undetectable	0.450323600948155	1
2.8	25% subclinical	Mean incubation 4.5d	detected: departure fever screen	0	0.126026975968834
2.8	25% subclinical	Mean incubation 4.5d	detected: departure risk screen	0.126026975968834	0.169725627170392
2.8	25% subclinical	Mean incubation 4.5d	detected: arrival fever screen	0.169725627170392	0.303760981826708
2.8	25% subclinical	Mean incubation 4.5d	detected: arrival risk screen	0.303760981826708	0.331244100965128
2.8	25% subclinical	Mean incubation 4.5d	missed: had both	0.331244100965128	0.338046647160091
2.8	25% subclinical	Mean incubation 4.5d	missed: had fever	0.338046647160091	0.386420308990942
2.8	25% subclinical	Mean incubation 4.5d	missed: had risk awareness	0.386420308990942	0.462067120211237
2.8	25% subclinical	Mean incubation 4.5d	missed: undetectable	0.462067120211237	1
2.9	25% subclinical	Mean incubation 4.5d	detected: departure fever screen	0	0.136065222874036
2.9	25% subclinical	Mean incubation 4.5d	detected: departure risk screen	0.136065222874036	0.179261961730334
2.9	25% subclinical	Mean incubation 4.5d	detected: arrival fever screen	0.179261961730334	0.31628722095155
2.9	25% subclinical	Mean incubation 4.5d	detected: arrival risk screen	0.31628722095155	0.34327588328241
2.9	25% subclinical	Mean incubation 4.5d	missed: had both	0.34327588328241	0.350230172754164
2.9	25% subclinical	Mean incubation 4.5d	missed: had fever	0.350230172754164	0.399682897886633
2.9	25% subclinical	Mean incubation 4.5d	missed: had risk awareness	0.399682897886633	0.473694595407459
2.9	25% subclinical	Mean incubation 4.5d	missed: undetectable	0.473694595407459	1
3	25% subclinical	Mean incubation 4.5d	detected: departure fever screen	0	0.146250854306822
3	25% subclinical	Mean incubation 4.5d	detected: departure risk screen	0.146250854306822	0.188938311591481
3	25% subclinical	Mean incubation 4.5d	detected: arrival fever screen	0.188938311591481	0.32874059951628
3	25% subclinical	Mean incubation 4.5d	detected: arrival risk screen	0.32874059951628	0.355237681114321
3	25% subclinical	Mean incubation 4.5d	missed: had both	0.355237681114321	0.362332910012761
3	25% subclinical	Mean incubation 4.5d	missed: had fever	0.362332910012761	0.412787871068327
3	25% subclinical	Mean incubation 4.5d	missed: had risk awareness	0.412787871068327	0.485183886964013
3	25% subclinical	Mean incubation 4.5d	missed: undetectable	0.485183886964013	1
3.1	25% subclinical	Mean incubation 4.5d	detected: departure fever screen	0	0.156550449411807
3.1	25% subclinical	Mean incubation 4.5d	detected: departure risk screen	0.156550449411807	0.198722926941217
3.1	25% subclinical	Mean incubation 4.5d	detected: arrival fever screen	0.198722926941217	0.341094823183893
3.1	25% subclinical	Mean incubation 4.5d	detected: arrival risk screen	0.341094823183893	0.367104238058213
3.1	25% subclinical	Mean incubation 4.5d	missed: had both	0.367104238058213	0.374329879408875
3.1	25% subclinical	Mean incubation 4.5d	missed: had fever	0.374329879408875	0.425712217902472
3.1	25% subclinical	Mean incubation 4.5d	missed: had risk awareness	0.425712217902472	0.49651482117477
3.1	25% subclinical	Mean incubation 4.5d	missed: undetectable	0.49651482117477	1
3.2	25% subclinical	Mean incubation 4.5d	detected: departure fever screen	0	0.166931733923722
3.2	25% subclinical	Mean incubation 4.5d	detected: departure risk screen	0.166931733923722	0.208585147227536
3.2	25% subclinical	Mean incubation 4.5d	detected: arrival fever screen	0.208585147227536	0.353325527918627
3.2	25% subclinical	Mean incubation 4.5d	detected: arrival risk screen	0.353325527918627	0.378852151816576
3.2	25% subclinical	Mean incubation 4.5d	missed: had both	0.378852151816576	0.386197998205034
3.2	25% subclinical	Mean incubation 4.5d	missed: had fever	0.386197998205034	0.43843512807851
3.2	25% subclinical	Mean incubation 4.5d	missed: had risk awareness	0.43843512807851	0.5076691533839
3.2	25% subclinical	Mean incubation 4.5d	missed: undetectable	0.5076691533839	1
3.3	25% subclinical	Mean incubation 4.5d	detected: departure fever screen	0	0.177363752648221
3.3	25% subclinical	Mean incubation 4.5d	detected: departure risk screen	0.177363752648221	0.21849556501581
3.3	25% subclinical	Mean incubation 4.5d	detected: arrival fever screen	0.21849556501581	0.365410288364067
3.3	25% subclinical	Mean incubation 4.5d	detected: arrival risk screen	0.365410288364067	0.390459882244433
3.3	25% subclinical	Mean incubation 4.5d	missed: had both	0.390459882244433	0.397916080609852
3.3	25% subclinical	Mean incubation 4.5d	missed: had fever	0.397916080609852	0.450937935652832
3.3	25% subclinical	Mean incubation 4.5d	missed: had risk awareness	0.450937935652832	0.51863051892851
3.3	25% subclinical	Mean incubation 4.5d	missed: undetectable	0.51863051892851	1
3.4	25% subclinical	Mean incubation 4.5d	detected: departure fever screen	0	0.187817008035045
3.4	25% subclinical	Mean incubation 4.5d	detected: departure risk screen	0.187817008035045	0.228426157633293
3.4	25% subclinical	Mean incubation 4.5d	detected: arrival fever screen	0.228426157633293	0.377328608113665
3.4	25% subclinical	Mean incubation 4.5d	detected: arrival risk screen	0.377328608113665	0.401907742003915
3.4	25% subclinical	Mean incubation 4.5d	missed: had both	0.401907742003915	0.409464821257618
3.4	25% subclinical	Mean incubation 4.5d	missed: had fever	0.409464821257618	0.463204051506173
3.4	25% subclinical	Mean incubation 4.5d	missed: had risk awareness	0.463204051506173	0.52938437392322
3.4	25% subclinical	Mean incubation 4.5d	missed: undetectable	0.52938437392322	1
3.5	25% subclinical	Mean incubation 4.5d	detected: departure fever screen	0	0.198263567820033
3.5	25% subclinical	Mean incubation 4.5d	detected: departure risk screen	0.198263567820033	0.238350389429032
3.5	25% subclinical	Mean incubation 4.5d	detected: arrival fever screen	0.238350389429032	0.389061894295813
3.5	25% subclinical	Mean incubation 4.5d	detected: arrival risk screen	0.389061894295813	0.413177872152558
3.5	25% subclinical	Mean incubation 4.5d	missed: had both	0.413177872152558	0.420826764316849
3.5	25% subclinical	Mean incubation 4.5d	missed: had fever	0.420826764316849	0.475218886374034
3.5	25% subclinical	Mean incubation 4.5d	missed: had risk awareness	0.475218886374034	0.539917927779975
3.5	25% subclinical	Mean incubation 4.5d	missed: undetectable	0.539917927779975	1
3.6	25% subclinical	Mean incubation 4.5d	detected: departure fever screen	0	0.208677144687082
3.6	25% subclinical	Mean incubation 4.5d	detected: departure risk screen	0.208677144687082	0.248243287452728
3.6	25% subclinical	Mean incubation 4.5d	detected: arrival fever screen	0.248243287452728	0.400593418735869
3.6	25% subclinical	Mean incubation 4.5d	detected: arrival risk screen	0.400593418735869	0.424254204838401
3.6	25% subclinical	Mean incubation 4.5d	missed: had both	0.424254204838401	0.431986260373447
3.6	25% subclinical	Mean incubation 4.5d	missed: had fever	0.431986260373447	0.486969766400446
3.6	25% subclinical	Mean incubation 4.5d	missed: had risk awareness	0.486969766400446	0.550220069172993
3.6	25% subclinical	Mean incubation 4.5d	missed: undetectable	0.550220069172993	1
3.7	25% subclinical	Mean incubation 4.5d	detected: departure fever screen	0	0.219033150829635
3.7	25% subclinical	Mean incubation 4.5d	detected: departure risk screen	0.219033150829635	0.258081493288154
3.7	25% subclinical	Mean incubation 4.5d	detected: arrival fever screen	0.258081493288154	0.411908267791128
3.7	25% subclinical	Mean incubation 4.5d	detected: arrival risk screen	0.411908267791128	0.435122415115163
3.7	25% subclinical	Mean incubation 4.5d	missed: had both	0.435122415115163	0.442929413069261
3.7	25% subclinical	Mean incubation 4.5d	missed: had fever	0.442929413069261	0.498445842965071
3.7	25% subclinical	Mean incubation 4.5d	missed: had risk awareness	0.498445842965071	0.560281286983076
3.7	25% subclinical	Mean incubation 4.5d	missed: undetectable	0.560281286983076	1
3.8	25% subclinical	Mean incubation 4.5d	detected: departure fever screen	0	0.229308730184832
3.8	25% subclinical	Mean incubation 4.5d	detected: departure risk screen	0.229308730184832	0.267843293675591
3.8	25% subclinical	Mean incubation 4.5d	detected: arrival fever screen	0.267843293675591	0.422993282785898
3.8	25% subclinical	Mean incubation 4.5d	detected: arrival risk screen	0.422993282785898	0.44576986372856
3.8	25% subclinical	Mean incubation 4.5d	missed: had both	0.44576986372856	0.453644017311226
3.8	25% subclinical	Mean incubation 4.5d	missed: had fever	0.453644017311226	0.509637998343517
3.8	25% subclinical	Mean incubation 4.5d	missed: had risk awareness	0.509637998343517	0.570093587588837
3.8	25% subclinical	Mean incubation 4.5d	missed: undetectable	0.570093587588837	1
3.9	25% subclinical	Mean incubation 4.5d	detected: departure fever screen	0	0.239482770981526
3.9	25% subclinical	Mean incubation 4.5d	detected: departure risk screen	0.239482770981526	0.27750863243245
3.9	25% subclinical	Mean incubation 4.5d	detected: arrival fever screen	0.27750863243245	0.43383699280578
3.9	25% subclinical	Mean incubation 4.5d	detected: arrival risk screen	0.43383699280578	0.456185532563446
3.9	25% subclinical	Mean incubation 4.5d	missed: had both	0.456185532563446	0.464119490702694
3.9	25% subclinical	Mean incubation 4.5d	missed: had fever	0.464119490702694	0.520538748581791
3.9	25% subclinical	Mean incubation 4.5d	missed: had risk awareness	0.520538748581791	0.579650409715543
3.9	25% subclinical	Mean incubation 4.5d	missed: undetectable	0.579650409715543	1
4	25% subclinical	Mean incubation 4.5d	detected: departure fever screen	0	0.249535901093511
4	25% subclinical	Mean incubation 4.5d	detected: departure risk screen	0.249535901093511	0.287059106038836
4	25% subclinical	Mean incubation 4.5d	detected: arrival fever screen	0.287059106038836	0.444429541445678
4	25% subclinical	Mean incubation 4.5d	detected: arrival risk screen	0.444429541445678	0.466359954283349
4	25% subclinical	Mean incubation 4.5d	missed: had both	0.466359954283349	0.474346799689335
4	25% subclinical	Mean incubation 4.5d	missed: had fever	0.474346799689335	0.531142144798572
4	25% subclinical	Mean incubation 4.5d	missed: had risk awareness	0.531142144798572	0.588946537905597
4	25% subclinical	Mean incubation 4.5d	missed: undetectable	0.588946537905597	1
4.1	25% subclinical	Mean incubation 4.5d	detected: departure fever screen	0	0.259450468527924
4.1	25% subclinical	Mean incubation 4.5d	detected: departure risk screen	0.259450468527924	0.296477945101528
4.1	25% subclinical	Mean incubation 4.5d	detected: arrival fever screen	0.296477945101528	0.454762608946852
4.1	25% subclinical	Mean incubation 4.5d	detected: arrival risk screen	0.454762608946852	0.476285137541056
4.1	25% subclinical	Mean incubation 4.5d	missed: had both	0.476285137541056	0.484318381758769
4.1	25% subclinical	Mean incubation 4.5d	missed: had fever	0.484318381758769	0.541443673973623
4.1	25% subclinical	Mean incubation 4.5d	missed: had risk awareness	0.541443673973623	0.597978015538519
4.1	25% subclinical	Mean incubation 4.5d	missed: undetectable	0.597978015538519	1
4.2	25% subclinical	Mean incubation 4.5d	detected: departure fever screen	0	0.269210509210912
4.2	25% subclinical	Mean incubation 4.5d	detected: departure risk screen	0.269210509210912	0.305749983750366
4.2	25% subclinical	Mean incubation 4.5d	detected: arrival fever screen	0.305749983750366	0.464829331006017
4.2	25% subclinical	Mean incubation 4.5d	detected: arrival risk screen	0.464829331006017	0.485954488992621
4.2	25% subclinical	Mean incubation 4.5d	missed: had both	0.485954488992621	0.494028064887175
4.2	25% subclinical	Mean incubation 4.5d	missed: had fever	0.494028064887175	0.551440160137335
4.2	25% subclinical	Mean incubation 4.5d	missed: had risk awareness	0.551440160137335	0.606742058202595
4.2	25% subclinical	Mean incubation 4.5d	missed: undetectable	0.606742058202595	1
4.3	25% subclinical	Mean incubation 4.5d	detected: departure fever screen	0	0.278801704062446
4.3	25% subclinical	Mean incubation 4.5d	detected: departure risk screen	0.278801704062446	0.314861618859324
4.3	25% subclinical	Mean incubation 4.5d	detected: arrival fever screen	0.314861618859324	0.474624215395096
4.3	25% subclinical	Mean incubation 4.5d	detected: arrival risk screen	0.474624215395096	0.495362733208447
4.3	25% subclinical	Mean incubation 4.5d	missed: had both	0.495362733208447	0.50347098528827
4.3	25% subclinical	Mean incubation 4.5d	missed: had fever	0.50347098528827	0.561129666744789
4.3	25% subclinical	Mean incubation 4.5d	missed: had risk awareness	0.561129666744789	0.615236968105021
4.3	25% subclinical	Mean incubation 4.5d	missed: undetectable	0.615236968105021	1
4.4	25% subclinical	Mean incubation 4.5d	detected: departure fever screen	0	0.288211327182818
4.4	25% subclinical	Mean incubation 4.5d	detected: departure risk screen	0.288211327182818	0.323800760823677
4.4	25% subclinical	Mean incubation 4.5d	detected: arrival fever screen	0.323800760823677	0.484143057394442
4.4	25% subclinical	Mean incubation 4.5d	detected: arrival risk screen	0.484143057394442	0.504505831444661
4.4	25% subclinical	Mean incubation 4.5d	missed: had both	0.504505831444661	0.512643504390922
4.4	25% subclinical	Mean incubation 4.5d	missed: had fever	0.512643504390922	0.570511400897664
4.4	25% subclinical	Mean incubation 4.5d	missed: had risk awareness	0.570511400897664	0.623462050102062
4.4	25% subclinical	Mean incubation 4.5d	missed: undetectable	0.623462050102062	1
4.5	25% subclinical	Mean incubation 4.5d	detected: departure fever screen	0	0.297428186807478
4.5	25% subclinical	Mean incubation 4.5d	detected: departure risk screen	0.297428186807478	0.332556777467104
4.5	25% subclinical	Mean incubation 4.5d	detected: arrival fever screen	0.332556777467104	0.49338285491561
4.5	25% subclinical	Mean incubation 4.5d	detected: arrival risk screen	0.49338285491561	0.51338090011631
4.5	25% subclinical	Mean incubation 4.5d	missed: had both	0.51338090011631	0.521543125851478
4.5	25% subclinical	Mean incubation 4.5d	missed: had fever	0.521543125851478	0.579585619968233
4.5	25% subclinical	Mean incubation 4.5d	missed: had risk awareness	0.579585619968233	0.631417529835163
4.5	25% subclinical	Mean incubation 4.5d	missed: undetectable	0.631417529835163	1
4.6	25% subclinical	Mean incubation 4.5d	detected: departure fever screen	0	0.306442560526369
4.6	25% subclinical	Mean incubation 4.5d	detected: departure risk screen	0.306442560526369	0.341120432500051
4.6	25% subclinical	Mean incubation 4.5d	detected: arrival fever screen	0.341120432500051	0.50234172407225
4.6	25% subclinical	Mean incubation 4.5d	detected: arrival risk screen	0.50234172407225	0.521986129700977
4.6	25% subclinical	Mean incubation 4.5d	missed: had both	0.521986129700977	0.530168413295806
4.6	25% subclinical	Mean incubation 4.5d	missed: had fever	0.530168413295806	0.588353541081262
4.6	25% subclinical	Mean incubation 4.5d	missed: had risk awareness	0.588353541081262	0.639104474372613
4.6	25% subclinical	Mean incubation 4.5d	missed: undetectable	0.639104474372613	1
4.7	25% subclinical	Mean incubation 4.5d	detected: departure fever screen	0	0.315246126110192
4.7	25% subclinical	Mean incubation 4.5d	detected: departure risk screen	0.315246126110192	0.349483819804682
4.7	25% subclinical	Mean incubation 4.5d	detected: arrival fever screen	0.349483819804682	0.511018815849408
4.7	25% subclinical	Mean incubation 4.5d	detected: arrival risk screen	0.511018815849408	0.530320704697458
4.7	25% subclinical	Mean incubation 4.5d	missed: had both	0.530320704697458	0.538518909383938
4.7	25% subclinical	Mean incubation 4.5d	missed: had fever	0.538518909383938	0.596817253821132
4.7	25% subclinical	Mean incubation 4.5d	missed: had risk awareness	0.596817253821132	0.646524715678801
4.7	25% subclinical	Mean incubation 4.5d	missed: undetectable	0.646524715678801	1
4.8	25% subclinical	Mean incubation 4.5d	detected: departure fever screen	0	0.323831889140232
4.8	25% subclinical	Mean incubation 4.5d	detected: departure risk screen	0.323831889140232	0.35764029468322
4.8	25% subclinical	Mean incubation 4.5d	detected: arrival fever screen	0.35764029468322	0.519414234422372
4.8	25% subclinical	Mean incubation 4.5d	detected: arrival risk screen	0.519414234422372	0.538384725168857
4.8	25% subclinical	Mean incubation 4.5d	missed: had both	0.538384725168857	0.546595056696972
4.8	25% subclinical	Mean incubation 4.5d	missed: had fever	0.546595056696972	0.604979636452455
4.8	25% subclinical	Mean incubation 4.5d	missed: had risk awareness	0.604979636452455	0.653680777163796
4.8	25% subclinical	Mean incubation 4.5d	missed: undetectable	0.653680777163796	1
4.9	25% subclinical	Mean incubation 4.5d	detected: departure fever screen	0	0.3321941085011
4.9	25% subclinical	Mean incubation 4.5d	detected: departure risk screen	0.3321941085011	0.365584403076045
4.9	25% subclinical	Mean incubation 4.5d	detected: arrival fever screen	0.365584403076045	0.527528957585841
4.9	25% subclinical	Mean incubation 4.5d	detected: arrival risk screen	0.527528957585841	0.546179130312715
4.9	25% subclinical	Mean incubation 4.5d	missed: had both	0.546179130312715	0.554398120861145
4.9	25% subclinical	Mean incubation 4.5d	missed: had fever	0.554398120861145	0.612844275872199
4.9	25% subclinical	Mean incubation 4.5d	missed: had risk awareness	0.612844275872199	0.660575803504394
4.9	25% subclinical	Mean incubation 4.5d	missed: undetectable	0.660575803504394	1
5	25% subclinical	Mean incubation 4.5d	detected: departure fever screen	0	0.340328220667397
5	25% subclinical	Mean incubation 4.5d	detected: departure risk screen	0.340328220667397	0.373311809634028
5	25% subclinical	Mean incubation 4.5d	detected: arrival fever screen	0.373311809634028	0.53536475967244
5	25% subclinical	Mean incubation 4.5d	detected: arrival risk screen	0.53536475967244	0.553705624422212
5	25% subclinical	Mean incubation 4.5d	missed: had both	0.553705624422212	0.56193011624747
5	25% subclinical	Mean incubation 4.5d	missed: had fever	0.56193011624747	0.620415391449303
5	25% subclinical	Mean incubation 4.5d	missed: had risk awareness	0.620415391449303	0.667213493873362
5	25% subclinical	Mean incubation 4.5d	missed: undetectable	0.667213493873362	1
5.1	25% subclinical	Mean incubation 4.5d	detected: departure fever screen	0	0.348230763596204
5.1	25% subclinical	Mean incubation 4.5d	detected: departure risk screen	0.348230763596204	0.380819225416394
5.1	25% subclinical	Mean incubation 4.5d	detected: arrival fever screen	0.380819225416394	0.542924137265902
5.1	25% subclinical	Mean incubation 4.5d	detected: arrival risk screen	0.542924137265902	0.560966605531721
5.1	25% subclinical	Mean incubation 4.5d	missed: had both	0.560966605531721	0.569193734516565
5.1	25% subclinical	Mean incubation 4.5d	missed: had fever	0.569193734516565	0.627697762853229
5.1	25% subclinical	Mean incubation 4.5d	missed: had risk awareness	0.627697762853229	0.673598038665845
5.1	25% subclinical	Mean incubation 4.5d	missed: undetectable	0.673598038665845	1
5.2	25% subclinical	Mean incubation 4.5d	detected: departure fever screen	0	0.35589930092727
5.2	25% subclinical	Mean incubation 4.5d	detected: departure risk screen	0.35589930092727	0.388104335880907
5.2	25% subclinical	Mean incubation 4.5d	detected: arrival fever screen	0.388104335880907	0.55021023794827
5.2	25% subclinical	Mean incubation 4.5d	detected: arrival risk screen	0.55021023794827	0.567965096976628
5.2	25% subclinical	Mean incubation 4.5d	missed: had both	0.567965096976628	0.576192276216889
5.2	25% subclinical	Mean incubation 4.5d	missed: had fever	0.576192276216889	0.634696661925411
5.2	25% subclinical	Mean incubation 4.5d	missed: had risk awareness	0.634696661925411	0.679734059770224
5.2	25% subclinical	Mean incubation 4.5d	missed: undetectable	0.679734059770224	1
5.3	25% subclinical	Mean incubation 4.5d	detected: departure fever screen	0	0.363332347091893
5.3	25% subclinical	Mean incubation 4.5d	detected: departure risk screen	0.363332347091893	0.395165729737298
5.3	25% subclinical	Mean incubation 4.5d	detected: arrival fever screen	0.395165729737298	0.557226792261759
5.3	25% subclinical	Mean incubation 4.5d	detected: arrival risk screen	0.557226792261759	0.5747046820409
5.3	25% subclinical	Mean incubation 4.5d	missed: had both	0.5747046820409	0.582929585590074
5.3	25% subclinical	Mean incubation 4.5d	missed: had fever	0.582929585590074	0.64141778860642
5.3	25% subclinical	Mean incubation 4.5d	missed: had risk awareness	0.64141778860642	0.68562655439467
5.3	25% subclinical	Mean incubation 4.5d	missed: undetectable	0.68562655439467	1
5.4	25% subclinical	Mean incubation 4.5d	detected: departure fever screen	0	0.370529293839304
5.4	25% subclinical	Mean incubation 4.5d	detected: departure risk screen	0.370529293839304	0.402002829147339
5.4	25% subclinical	Mean incubation 4.5d	detected: arrival fever screen	0.402002829147339	0.563978049013856
5.4	25% subclinical	Mean incubation 4.5d	detected: arrival risk screen	0.563978049013856	0.581189441815941
5.4	25% subclinical	Mean incubation 4.5d	missed: had both	0.581189441815941	0.589409988688866
5.4	25% subclinical	Mean incubation 4.5d	missed: had fever	0.589409988688866	0.647867210896331
5.4	25% subclinical	Mean incubation 4.5d	missed: had risk awareness	0.647867210896331	0.69128084242966
5.4	25% subclinical	Mean incubation 4.5d	missed: undetectable	0.69128084242966	1
5.5	25% subclinical	Mean incubation 4.5d	detected: departure fever screen	0	0.377490338605768
5.5	25% subclinical	Mean incubation 4.5d	detected: departure risk screen	0.377490338605768	0.408615821675479
5.5	25% subclinical	Mean incubation 4.5d	detected: arrival fever screen	0.408615821675479	0.570468714008603
5.5	25% subclinical	Mean incubation 4.5d	detected: arrival risk screen	0.570468714008603	0.587423896350368
5.5	25% subclinical	Mean incubation 4.5d	missed: had both	0.587423896350368	0.595638234871034
5.5	25% subclinical	Mean incubation 4.5d	missed: had fever	0.595638234871034	0.654051308795771
5.5	25% subclinical	Mean incubation 4.5d	missed: had risk awareness	0.654051308795771	0.696702517300402
5.5	25% subclinical	Mean incubation 4.5d	missed: undetectable	0.696702517300402	1
5.6	25% subclinical	Mean incubation 4.5d	detected: departure fever screen	0	0.384216415076036
5.6	25% subclinical	Mean incubation 4.5d	detected: departure risk screen	0.384216415076036	0.415005594322234
5.6	25% subclinical	Mean incubation 4.5d	detected: arrival fever screen	0.415005594322234	0.576703892246982
5.6	25% subclinical	Mean incubation 4.5d	detected: arrival risk screen	0.576703892246982	0.59341294913197
5.6	25% subclinical	Mean incubation 4.5d	missed: had both	0.59341294913197	0.601619441695819
5.6	25% subclinical	Mean incubation 4.5d	missed: had fever	0.601619441695819	0.659976722149864
5.6	25% subclinical	Mean incubation 4.5d	missed: had risk awareness	0.659976722149864	0.701897400240976
5.6	25% subclinical	Mean incubation 4.5d	missed: undetectable	0.701897400240976	1
5.7	25% subclinical	Mean incubation 4.5d	detected: departure fever screen	0	0.390709126218951
5.7	25% subclinical	Mean incubation 4.5d	detected: departure risk screen	0.390709126218951	0.421173669908003
5.7	25% subclinical	Mean incubation 4.5d	detected: arrival fever screen	0.421173669908003	0.582689033604795
5.7	25% subclinical	Mean incubation 4.5d	detected: arrival risk screen	0.582689033604795	0.599161834909869
5.7	25% subclinical	Mean incubation 4.5d	missed: had both	0.599161834909869	0.607359043217788
5.7	25% subclinical	Mean incubation 4.5d	missed: had fever	0.607359043217788	0.66565030229633
5.7	25% subclinical	Mean incubation 4.5d	missed: had risk awareness	0.66565030229633	0.706871497903632
5.7	25% subclinical	Mean incubation 4.5d	missed: undetectable	0.706871497903632	1
5.8	25% subclinical	Mean incubation 4.5d	detected: departure fever screen	0	0.396970680018321
5.8	25% subclinical	Mean incubation 4.5d	detected: departure risk screen	0.396970680018321	0.427122146017405
5.8	25% subclinical	Mean incubation 4.5d	detected: arrival fever screen	0.427122146017405	0.588429881966608
5.8	25% subclinical	Mean incubation 4.5d	detected: arrival risk screen	0.588429881966608	0.604676070836348
5.8	25% subclinical	Mean incubation 4.5d	missed: had both	0.604676070836348	0.6128627416458
5.8	25% subclinical	Mean incubation 4.5d	missed: had fever	0.6128627416458	0.671079067401903
5.8	25% subclinical	Mean incubation 4.5d	missed: had risk awareness	0.671079067401903	0.711630963201668
5.8	25% subclinical	Mean incubation 4.5d	missed: undetectable	0.711630963201668	1
5.9	25% subclinical	Mean incubation 4.5d	detected: departure fever screen	0	0.403003828066344
5.9	25% subclinical	Mean incubation 4.5d	detected: departure risk screen	0.403003828066344	0.432853636663027
5.9	25% subclinical	Mean incubation 4.5d	detected: arrival fever screen	0.432853636663027	0.593932427769068
5.9	25% subclinical	Mean incubation 4.5d	detected: arrival risk screen	0.593932427769068	0.609961410883447
5.9	25% subclinical	Mean incubation 4.5d	missed: had both	0.609961410883447	0.618136462311761
5.9	25% subclinical	Mean incubation 4.5d	missed: had fever	0.618136462311761	0.67627016135755
5.9	25% subclinical	Mean incubation 4.5d	missed: had risk awareness	0.67627016135755	0.716182059272372
5.9	25% subclinical	Mean incubation 4.5d	missed: undetectable	0.716182059272372	1
6	25% subclinical	Mean incubation 4.5d	detected: departure fever screen	0	0.408811807139192
6	25% subclinical	Mean incubation 4.5d	detected: departure risk screen	0.408811807139192	0.438371216782232
6	25% subclinical	Mean incubation 4.5d	detected: arrival fever screen	0.438371216782232	0.599202863885536
6	25% subclinical	Mean incubation 4.5d	detected: arrival risk screen	0.599202863885536	0.615023803469002
6	25% subclinical	Mean incubation 4.5d	missed: had both	0.615023803469002	0.62318631187462
6	25% subclinical	Mean incubation 4.5d	missed: had fever	0.62318631187462	0.681230816092354
6	25% subclinical	Mean incubation 4.5d	missed: had risk awareness	0.681230816092354	0.720531126437132
6	25% subclinical	Mean incubation 4.5d	missed: undetectable	0.720531126437132	1
6.1	25% subclinical	Mean incubation 4.5d	detected: departure fever screen	0	0.414398283832614
6.1	25% subclinical	Mean incubation 4.5d	detected: departure risk screen	0.414398283832614	0.443678369640984
6.1	25% subclinical	Mean incubation 4.5d	detected: arrival fever screen	0.443678369640984	0.604247544766339
6.1	25% subclinical	Mean incubation 4.5d	detected: arrival risk screen	0.604247544766339	0.619869352209773
6.1	25% subclinical	Mean incubation 4.5d	missed: had both	0.619869352209773	0.628018539669142
6.1	25% subclinical	Mean incubation 4.5d	missed: had fever	0.628018539669142	0.685968317157992
6.1	25% subclinical	Mean incubation 4.5d	missed: had risk awareness	0.685968317157992	0.724684552028925
6.1	25% subclinical	Mean incubation 4.5d	missed: undetectable	0.724684552028925	1
6.2	25% subclinical	Mean incubation 4.5d	detected: departure fever screen	0	0.419767302298946
6.2	25% subclinical	Mean incubation 4.5d	detected: departure risk screen	0.419767302298946	0.448778937183998
6.2	25% subclinical	Mean incubation 4.5d	detected: arrival fever screen	0.448778937183998	0.609072948734428
6.2	25% subclinical	Mean incubation 4.5d	detected: arrival risk screen	0.609072948734428	0.624504279705438
6.2	25% subclinical	Mean incubation 4.5d	missed: had both	0.624504279705438	0.632639502096155
6.2	25% subclinical	Mean incubation 4.5d	missed: had fever	0.632639502096155	0.690489972430145
6.2	25% subclinical	Mean incubation 4.5d	missed: had risk awareness	0.690489972430145	0.728648742952456
6.2	25% subclinical	Mean incubation 4.5d	missed: undetectable	0.728648742952456	1
6.3	25% subclinical	Mean incubation 4.5d	detected: departure fever screen	0	0.424923235095336
6.3	25% subclinical	Mean incubation 4.5d	detected: departure risk screen	0.424923235095336	0.453677073340569
6.3	25% subclinical	Mean incubation 4.5d	detected: arrival fever screen	0.453677073340569	0.613685643324742
6.3	25% subclinical	Mean incubation 4.5d	detected: arrival risk screen	0.613685643324742	0.628934894246133
6.3	25% subclinical	Mean incubation 4.5d	missed: had both	0.628934894246133	0.637055629940819
6.3	25% subclinical	Mean incubation 4.5d	missed: had fever	0.637055629940819	0.694803083769693
6.3	25% subclinical	Mean incubation 4.5d	missed: had risk awareness	0.694803083769693	0.732430100839183
6.3	25% subclinical	Mean incubation 4.5d	missed: undetectable	0.732430100839183	1
6.4	25% subclinical	Mean incubation 4.5d	detected: departure fever screen	0	0.429870737125952
6.4	25% subclinical	Mean incubation 4.5d	detected: departure risk screen	0.429870737125952	0.458377200269655
6.4	25% subclinical	Mean incubation 4.5d	detected: arrival fever screen	0.458377200269655	0.618092253546529
6.4	25% subclinical	Mean incubation 4.5d	detected: arrival risk screen	0.618092253546529	0.633167559327587
6.4	25% subclinical	Mean incubation 4.5d	missed: had both	0.633167559327587	0.641273398497654
6.4	25% subclinical	Mean incubation 4.5d	missed: had fever	0.641273398497654	0.698914921484797
6.4	25% subclinical	Mean incubation 4.5d	missed: had risk awareness	0.698914921484797	0.736034999657904
6.4	25% subclinical	Mean incubation 4.5d	missed: undetectable	0.736034999657904	1
6.5	25% subclinical	Mean incubation 4.5d	detected: departure fever screen	0	0.434614702637851
6.5	25% subclinical	Mean incubation 4.5d	detected: departure risk screen	0.434614702637851	0.462883967505959
6.5	25% subclinical	Mean incubation 4.5d	detected: arrival fever screen	0.462883967505959	0.622299432941251
6.5	25% subclinical	Mean incubation 4.5d	detected: arrival risk screen	0.622299432941251	0.637208665851465
6.5	25% subclinical	Mean incubation 4.5d	missed: had both	0.637208665851465	0.645299300375437
6.5	25% subclinical	Mean incubation 4.5d	missed: had fever	0.645299300375437	0.70283270143479
6.5	25% subclinical	Mean incubation 4.5d	missed: had risk awareness	0.70283270143479	0.73946976564146
6.5	25% subclinical	Mean incubation 4.5d	missed: undetectable	0.73946976564146	1
6.6	25% subclinical	Mean incubation 4.5d	detected: departure fever screen	0	0.439160225210854
6.6	25% subclinical	Mean incubation 4.5d	detected: departure risk screen	0.439160225210854	0.467202213950312
6.6	25% subclinical	Mean incubation 4.5d	detected: arrival fever screen	0.467202213950312	0.626313837303917
6.6	25% subclinical	Mean incubation 4.5d	detected: arrival risk screen	0.626313837303917	0.641064606884026
6.6	25% subclinical	Mean incubation 4.5d	missed: had both	0.641064606884026	0.64913982085122
6.6	25% subclinical	Mean incubation 4.5d	missed: had fever	0.64913982085122	0.706563564617935
6.6	25% subclinical	Mean incubation 4.5d	missed: had risk awareness	0.706563564617935	0.742740659391066
6.6	25% subclinical	Mean incubation 4.5d	missed: undetectable	0.742740659391066	1
6.7	25% subclinical	Mean incubation 4.5d	detected: departure fever screen	0	0.443512560665678
6.7	25% subclinical	Mean incubation 4.5d	detected: departure risk screen	0.443512560665678	0.471336932632394
6.7	25% subclinical	Mean incubation 4.5d	detected: arrival fever screen	0.471336932632394	0.630142100932805
6.7	25% subclinical	Mean incubation 4.5d	detected: arrival risk screen	0.630142100932805	0.644741754843352
6.7	25% subclinical	Mean incubation 4.5d	missed: had both	0.644741754843352	0.652801415640553
6.7	25% subclinical	Mean incubation 4.5d	missed: had fever	0.652801415640553	0.710114559087318
6.7	25% subclinical	Mean incubation 4.5d	missed: had risk awareness	0.710114559087318	0.745853860021759
6.7	25% subclinical	Mean incubation 4.5d	missed: undetectable	0.745853860021759	1
6.8	25% subclinical	Mean incubation 4.5d	detected: departure fever screen	0	0.44767709280146
6.8	25% subclinical	Mean incubation 4.5d	detected: departure risk screen	0.44767709280146	0.475293238161387
6.8	25% subclinical	Mean incubation 4.5d	detected: arrival fever screen	0.475293238161387	0.633790815271068
6.8	25% subclinical	Mean incubation 4.5d	detected: arrival risk screen	0.633790815271068	0.648246440984052
6.8	25% subclinical	Mean incubation 4.5d	missed: had both	0.648246440984052	0.656290490950145
6.8	25% subclinical	Mean incubation 4.5d	missed: had fever	0.656290490950145	0.713492624042361
6.8	25% subclinical	Mean incubation 4.5d	missed: had risk awareness	0.713492624042361	0.74881545121522
6.8	25% subclinical	Mean incubation 4.5d	missed: undetectable	0.74881545121522	1
6.9	25% subclinical	Mean incubation 4.5d	detected: departure fever screen	0	0.451659301863326
6.9	25% subclinical	Mean incubation 4.5d	detected: departure risk screen	0.451659301863326	0.479076336770159
6.9	25% subclinical	Mean incubation 4.5d	detected: arrival fever screen	0.479076336770159	0.6372665098036
6.9	25% subclinical	Mean incubation 4.5d	detected: arrival risk screen	0.6372665098036	0.651584937048194
6.9	25% subclinical	Mean incubation 4.5d	missed: had both	0.651584937048194	0.659613385679591
6.9	25% subclinical	Mean incubation 4.5d	missed: had fever	0.659613385679591	0.716704575947298
6.9	25% subclinical	Mean incubation 4.5d	missed: had risk awareness	0.716704575947298	0.751631409049686
6.9	25% subclinical	Mean incubation 4.5d	missed: undetectable	0.751631409049686	1
7	25% subclinical	Mean incubation 4.5d	detected: departure fever screen	0	0.455464735632491
7	25% subclinical	Mean incubation 4.5d	detected: departure risk screen	0.455464735632491	0.482691498850866
7	25% subclinical	Mean incubation 4.5d	detected: arrival fever screen	0.482691498850866	0.640575635073541
7	25% subclinical	Mean incubation 4.5d	detected: arrival risk screen	0.640575635073541	0.654763438952217
7	25% subclinical	Mean incubation 4.5d	missed: had both	0.654763438952217	0.66277635564021
7	25% subclinical	Mean incubation 4.5d	missed: had fever	0.66277635564021	0.719757096532604
7	25% subclinical	Mean incubation 4.5d	missed: had risk awareness	0.719757096532604	0.754307591480639
7	25% subclinical	Mean incubation 4.5d	missed: undetectable	0.754307591480639	1
7.1	25% subclinical	Mean incubation 4.5d	detected: departure fever screen	0	0.459098983025309
7.1	25% subclinical	Mean incubation 4.5d	detected: departure risk screen	0.459098983025309	0.486144033874044
7.1	25% subclinical	Mean incubation 4.5d	detected: arrival fever screen	0.486144033874044	0.643724547684745
7.1	25% subclinical	Mean incubation 4.5d	detected: arrival risk screen	0.643724547684745	0.6577880523814
7.1	25% subclinical	Mean incubation 4.5d	missed: had both	0.6577880523814	0.665785559661267
7.1	25% subclinical	Mean incubation 4.5d	missed: had fever	0.665785559661267	0.722656722540317
7.1	25% subclinical	Mean incubation 4.5d	missed: had risk awareness	0.722656722540317	0.756849729350415
7.1	25% subclinical	Mean incubation 4.5d	missed: undetectable	0.756849729350415	1
7.2	25% subclinical	Mean incubation 4.5d	detected: departure fever screen	0	0.462567650083399
7.2	25% subclinical	Mean incubation 4.5d	detected: departure risk screen	0.462567650083399	0.489439267579229
7.2	25% subclinical	Mean incubation 4.5d	detected: arrival fever screen	0.489439267579229	0.646719497159254
7.2	25% subclinical	Mean incubation 4.5d	detected: arrival risk screen	0.646719497159254	0.660664780166125
7.2	25% subclinical	Mean incubation 4.5d	missed: had both	0.660664780166125	0.668647047456841
7.2	25% subclinical	Mean incubation 4.5d	missed: had fever	0.668647047456841	0.725409837079707
7.2	25% subclinical	Mean incubation 4.5d	missed: had risk awareness	0.725409837079707	0.759263418809606
7.2	25% subclinical	Mean incubation 4.5d	missed: undetectable	0.759263418809606	1
7.3	25% subclinical	Mean incubation 4.5d	detected: departure fever screen	0	0.465876338234285
7.3	25% subclinical	Mean incubation 4.5d	detected: departure risk screen	0.465876338234285	0.492582521322571
7.3	25% subclinical	Mean incubation 4.5d	detected: arrival fever screen	0.492582521322571	0.649566614522233
7.3	25% subclinical	Mean incubation 4.5d	detected: arrival risk screen	0.649566614522233	0.663399511317408
7.3	25% subclinical	Mean incubation 4.5d	missed: had both	0.663399511317408	0.671366749130173
7.3	25% subclinical	Mean incubation 4.5d	missed: had fever	0.671366749130173	0.728022662465389
7.3	25% subclinical	Mean incubation 4.5d	missed: had risk awareness	0.728022662465389	0.76155411503815
7.3	25% subclinical	Mean incubation 4.5d	missed: undetectable	0.76155411503815	1
7.4	25% subclinical	Mean incubation 4.5d	detected: departure fever screen	0	0.469030624700666
7.4	25% subclinical	Mean incubation 4.5d	detected: departure risk screen	0.469030624700666	0.495579093465633
7.4	25% subclinical	Mean incubation 4.5d	detected: arrival fever screen	0.495579093465633	0.65227190249074
7.4	25% subclinical	Mean incubation 4.5d	detected: arrival risk screen	0.65227190249074	0.665998011602948
7.4	25% subclinical	Mean incubation 4.5d	missed: had both	0.665998011602948	0.673950466196327
7.4	25% subclinical	Mean incubation 4.5d	missed: had fever	0.673950466196327	0.730501254415915
7.4	25% subclinical	Mean incubation 4.5d	missed: had risk awareness	0.730501254415915	0.763727127159158
7.4	25% subclinical	Mean incubation 4.5d	missed: undetectable	0.763727127159158	1
7.5	25% subclinical	Mean incubation 4.5d	detected: departure fever screen	0	0.472036044936277
7.5	25% subclinical	Mean incubation 4.5d	detected: departure risk screen	0.472036044936277	0.498434242689464
7.5	25% subclinical	Mean incubation 4.5d	detected: arrival fever screen	0.498434242689464	0.654841227147024
7.5	25% subclinical	Mean incubation 4.5d	detected: arrival risk screen	0.654841227147024	0.668465915549115
7.5	25% subclinical	Mean incubation 4.5d	missed: had both	0.668465915549115	0.676403864008428
7.5	25% subclinical	Mean incubation 4.5d	missed: had fever	0.676403864008428	0.73285149749687
7.5	25% subclinical	Mean incubation 4.5d	missed: had risk awareness	0.73285149749687	0.765787614243832
7.5	25% subclinical	Mean incubation 4.5d	missed: undetectable	0.765787614243832	1
7.6	25% subclinical	Mean incubation 4.5d	detected: departure fever screen	0	0.474898076967183
7.6	25% subclinical	Mean incubation 4.5d	detected: departure risk screen	0.474898076967183	0.501153173118824
7.6	25% subclinical	Mean incubation 4.5d	detected: arrival fever screen	0.501153173118824	0.657280310981745
7.6	25% subclinical	Mean incubation 4.5d	detected: arrival risk screen	0.657280310981745	0.670808719758781
7.6	25% subclinical	Mean incubation 4.5d	missed: had both	0.670808719758781	0.678732465477388
7.6	25% subclinical	Mean incubation 4.5d	missed: had fever	0.678732465477388	0.735079101698593
7.6	25% subclinical	Mean incubation 4.5d	missed: had risk awareness	0.735079101698593	0.767740582311095
7.6	25% subclinical	Mean incubation 4.5d	missed: undetectable	0.767740582311095	1
7.7	25% subclinical	Mean incubation 4.5d	detected: departure fever screen	0	0.477622127519039
7.7	25% subclinical	Mean incubation 4.5d	detected: departure risk screen	0.477622127519039	0.503741021143087
7.7	25% subclinical	Mean incubation 4.5d	detected: arrival fever screen	0.503741021143087	0.659594727197398
7.7	25% subclinical	Mean incubation 4.5d	detected: arrival risk screen	0.659594727197398	0.673031777439606
7.7	25% subclinical	Mean incubation 4.5d	missed: had both	0.673031777439606	0.680941645979956
7.7	25% subclinical	Mean incubation 4.5d	missed: had fever	0.680941645979956	0.73718960004467
7.7	25% subclinical	Mean incubation 4.5d	missed: had risk awareness	0.73718960004467	0.769590882230944
7.7	25% subclinical	Mean incubation 4.5d	missed: undetectable	0.769590882230944	1
7.8	25% subclinical	Mean incubation 4.5d	detected: departure fever screen	0	0.480213519813318
7.8	25% subclinical	Mean incubation 4.5d	detected: departure risk screen	0.480213519813318	0.506202843822652
7.8	25% subclinical	Mean incubation 4.5d	detected: arrival fever screen	0.506202843822652	0.661789895167303
7.8	25% subclinical	Mean incubation 4.5d	detected: arrival risk screen	0.661789895167303	0.675140294042278
7.8	25% subclinical	Mean incubation 4.5d	missed: had both	0.675140294042278	0.683036629354883
7.8	25% subclinical	Mean incubation 4.5d	missed: had fever	0.683036629354883	0.739188347133403
7.8	25% subclinical	Mean incubation 4.5d	missed: had risk awareness	0.739188347133403	0.771343208445723
7.8	25% subclinical	Mean incubation 4.5d	missed: undetectable	0.771343208445723	1
7.9	25% subclinical	Mean incubation 4.5d	detected: departure fever screen	0	0.482677482918475
7.9	25% subclinical	Mean incubation 4.5d	detected: departure risk screen	0.482677482918475	0.508543608772552
7.9	25% subclinical	Mean incubation 4.5d	detected: arrival fever screen	0.508543608772552	0.66387107695069
7.9	25% subclinical	Mean incubation 4.5d	detected: arrival risk screen	0.66387107695069	0.677139323913163
7.9	25% subclinical	Mean incubation 4.5d	missed: had both	0.677139323913163	0.685022484892128
7.9	25% subclinical	Mean incubation 4.5d	missed: had fever	0.685022484892128	0.741080518520329
7.9	25% subclinical	Mean incubation 4.5d	missed: had risk awareness	0.741080518520329	0.773002098428781
7.9	25% subclinical	Mean incubation 4.5d	missed: undetectable	0.773002098428781	1
8	25% subclinical	Mean incubation 4.5d	detected: departure fever screen	0	0.485019142545559
8	25% subclinical	Mean incubation 4.5d	detected: departure risk screen	0.485019142545559	0.510768185418281
8	25% subclinical	Mean incubation 4.5d	detected: arrival fever screen	0.510768185418281	0.665843374769632
8	25% subclinical	Mean incubation 4.5d	detected: arrival risk screen	0.665843374769632	0.679033767870831
8	25% subclinical	Mean incubation 4.5d	missed: had both	0.679033767870831	0.686904125225129
8	25% subclinical	Mean incubation 4.5d	missed: had fever	0.686904125225129	0.742871110855691
8	25% subclinical	Mean incubation 4.5d	missed: had risk awareness	0.742871110855691	0.77457193280499
8	25% subclinical	Mean incubation 4.5d	missed: undetectable	0.77457193280499	1
8.1	25% subclinical	Mean incubation 4.5d	detected: departure fever screen	0	0.487243513181613
8.1	25% subclinical	Mean incubation 4.5d	detected: departure risk screen	0.487243513181613	0.512881337522532
8.1	25% subclinical	Mean incubation 4.5d	detected: arrival fever screen	0.512881337522532	0.667711729358797
8.1	25% subclinical	Mean incubation 4.5d	detected: arrival risk screen	0.667711729358797	0.68082837162095
8.1	25% subclinical	Mean incubation 4.5d	missed: had both	0.68082837162095	0.688686305041211
8.1	25% subclinical	Mean incubation 4.5d	missed: had fever	0.688686305041211	0.744564942696404
8.1	25% subclinical	Mean incubation 4.5d	missed: had risk awareness	0.744564942696404	0.776056936062601
8.1	25% subclinical	Mean incubation 4.5d	missed: undetectable	0.776056936062601	1
8.2	25% subclinical	Mean incubation 4.5d	detected: departure fever screen	0	0.489355491458405
8.2	25% subclinical	Mean incubation 4.5d	detected: departure risk screen	0.489355491458405	0.514887716885485
8.2	25% subclinical	Mean incubation 4.5d	detected: arrival fever screen	0.514887716885485	0.66948091910414
8.2	25% subclinical	Mean incubation 4.5d	detected: arrival risk screen	0.66948091910414	0.682527724928977
8.2	25% subclinical	Mean incubation 4.5d	missed: had both	0.682527724928977	0.690373620530299
8.2	25% subclinical	Mean incubation 4.5d	missed: had fever	0.690373620530299	0.746166655917483
8.2	25% subclinical	Mean incubation 4.5d	missed: had risk awareness	0.746166655917483	0.77746117779067
8.2	25% subclinical	Mean incubation 4.5d	missed: undetectable	0.77746117779067	1
8.3	25% subclinical	Mean incubation 4.5d	detected: departure fever screen	0	0.491359850658381
8.3	25% subclinical	Mean incubation 4.5d	detected: departure risk screen	0.491359850658381	0.516791858125462
8.3	25% subclinical	Mean incubation 4.5d	detected: arrival fever screen	0.516791858125462	0.671155559891775
8.3	25% subclinical	Mean incubation 4.5d	detected: arrival risk screen	0.671155559891775	0.684136261474995
8.3	25% subclinical	Mean incubation 4.5d	missed: had both	0.684136261474995	0.691970509496969
8.3	25% subclinical	Mean incubation 4.5d	missed: had fever	0.691970509496969	0.747680717653233
8.3	25% subclinical	Mean incubation 4.5d	missed: had risk awareness	0.747680717653233	0.778788574380916
8.3	25% subclinical	Mean incubation 4.5d	missed: undetectable	0.778788574380916	1
8.4	25% subclinical	Mean incubation 4.5d	detected: departure fever screen	0	0.493261236264264
8.4	25% subclinical	Mean incubation 4.5d	detected: departure risk screen	0.493261236264264	0.51859817445105
8.4	25% subclinical	Mean incubation 4.5d	detected: arrival fever screen	0.51859817445105	0.672740105593221
8.4	25% subclinical	Mean incubation 4.5d	detected: arrival risk screen	0.672740105593221	0.685658259319805
8.4	25% subclinical	Mean incubation 4.5d	missed: had both	0.685658259319805	0.693481252065742
8.4	25% subclinical	Mean incubation 4.5d	missed: had fever	0.693481252065742	0.749111422703518
8.4	25% subclinical	Mean incubation 4.5d	missed: had risk awareness	0.749111422703518	0.780042891137331
8.4	25% subclinical	Mean incubation 4.5d	missed: undetectable	0.780042891137331	1
8.5	25% subclinical	Mean incubation 4.5d	detected: departure fever screen	0	0.495064162463353
8.5	25% subclinical	Mean incubation 4.5d	detected: departure risk screen	0.495064162463353	0.520310954340185
8.5	25% subclinical	Mean incubation 4.5d	detected: arrival fever screen	0.520310954340185	0.67423884911809
8.5	25% subclinical	Mean incubation 4.5d	detected: arrival risk screen	0.67423884911809	0.68709784191606
8.5	25% subclinical	Mean incubation 4.5d	missed: had both	0.68709784191606	0.694909971914187
8.5	25% subclinical	Mean incubation 4.5d	missed: had fever	0.694909971914187	0.750462896345311
8.5	25% subclinical	Mean incubation 4.5d	missed: had risk awareness	0.750462896345311	0.781227744741095
8.5	25% subclinical	Mean incubation 4.5d	missed: undetectable	0.781227744741095	1
8.6	25% subclinical	Mean incubation 4.5d	detected: departure fever screen	0	0.496773009522208
8.6	25% subclinical	Mean incubation 4.5d	detected: departure risk screen	0.496773009522208	0.521934359046098
8.6	25% subclinical	Mean incubation 4.5d	detected: arrival fever screen	0.521934359046098	0.675655923969971
8.6	25% subclinical	Mean incubation 4.5d	detected: arrival risk screen	0.675655923969971	0.688458979602736
8.6	25% subclinical	Mean incubation 4.5d	missed: had both	0.688458979602736	0.696260637972932
8.6	25% subclinical	Mean incubation 4.5d	missed: had fever	0.696260637972932	0.75173909749433
8.6	25% subclinical	Mean incubation 4.5d	missed: had risk awareness	0.75173909749433	0.782346606022427
8.6	25% subclinical	Mean incubation 4.5d	missed: undetectable	0.782346606022427	1
8.7	25% subclinical	Mean incubation 4.5d	detected: departure fever screen	0	0.498392021952076
8.7	25% subclinical	Mean incubation 4.5d	detected: departure risk screen	0.498392021952076	0.523472420854472
8.7	25% subclinical	Mean incubation 4.5d	detected: arrival fever screen	0.523472420854472	0.676995306245808
8.7	25% subclinical	Mean incubation 4.5d	detected: arrival risk screen	0.676995306245808	0.689745491525578
8.7	25% subclinical	Mean incubation 4.5d	missed: had both	0.689745491525578	0.697537066536041
8.7	25% subclinical	Mean incubation 4.5d	missed: had fever	0.697537066536041	0.752943822165997
8.7	25% subclinical	Mean incubation 4.5d	missed: had risk awareness	0.752943822165997	0.783402802994846
8.7	25% subclinical	Mean incubation 4.5d	missed: undetectable	0.783402802994846	1
8.8	25% subclinical	Mean incubation 4.5d	detected: departure fever screen	0	0.499925307390008
8.8	25% subclinical	Mean incubation 4.5d	detected: departure risk screen	0.499925307390008	0.524929042020507
8.8	25% subclinical	Mean incubation 4.5d	detected: arrival fever screen	0.524929042020507	0.678260817023424
8.8	25% subclinical	Mean incubation 4.5d	detected: arrival risk screen	0.678260817023424	0.690961047930394
8.8	25% subclinical	Mean incubation 4.5d	missed: had both	0.690961047930394	0.698742923729414
8.8	25% subclinical	Mean incubation 4.5d	missed: had fever	0.698742923729414	0.754080707189113
8.8	25% subclinical	Mean incubation 4.5d	missed: had risk awareness	0.754080707189113	0.784399524111003
8.8	25% subclinical	Mean incubation 4.5d	missed: undetectable	0.784399524111003	1
8.9	25% subclinical	Mean incubation 4.5d	detected: departure fever screen	0	0.501376836125183
8.9	25% subclinical	Mean incubation 4.5d	detected: departure risk screen	0.501376836125183	0.526307994318924
8.9	25% subclinical	Mean incubation 4.5d	detected: arrival fever screen	0.526307994318924	0.679456125086025
8.9	25% subclinical	Mean incubation 4.5d	detected: arrival risk screen	0.679456125086025	0.692109172779998
8.9	25% subclinical	Mean incubation 4.5d	missed: had both	0.692109172779998	0.699881728288854
8.9	25% subclinical	Mean incubation 4.5d	missed: had fever	0.699881728288854	0.755153234129613
8.9	25% subclinical	Mean incubation 4.5d	missed: had risk awareness	0.755153234129613	0.785339821702674
8.9	25% subclinical	Mean incubation 4.5d	missed: undetectable	0.785339821702674	1
9	25% subclinical	Mean incubation 4.5d	detected: departure fever screen	0	0.502750441204366
9	25% subclinical	Mean incubation 4.5d	detected: departure risk screen	0.502750441204366	0.527612919144148
9	25% subclinical	Mean incubation 4.5d	detected: arrival fever screen	0.527612919144148	0.680584749936489
9	25% subclinical	Mean incubation 4.5d	detected: arrival risk screen	0.680584749936489	0.693193246649522
9	25% subclinical	Mean incubation 4.5d	missed: had both	0.693193246649522	0.700956854603269
9	25% subclinical	Mean incubation 4.5d	missed: had fever	0.700956854603269	0.756164733385467
9	25% subclinical	Mean incubation 4.5d	missed: had risk awareness	0.756164733385467	0.78622661557082
9	25% subclinical	Mean incubation 4.5d	missed: undetectable	0.78622661557082	1
9.1	25% subclinical	Mean incubation 4.5d	detected: departure fever screen	0	0.504049819054776
9.1	25% subclinical	Mean incubation 4.5d	detected: departure risk screen	0.504049819054776	0.528847328102037
9.1	25% subclinical	Mean incubation 4.5d	detected: arrival fever screen	0.528847328102037	0.681650065058038
9.1	25% subclinical	Mean incubation 4.5d	detected: arrival risk screen	0.681650065058038	0.694216509858379
9.1	25% subclinical	Mean incubation 4.5d	missed: had both	0.694216509858379	0.701971535982086
9.1	25% subclinical	Mean incubation 4.5d	missed: had fever	0.701971535982086	0.757118388417334
9.1	25% subclinical	Mean incubation 4.5d	missed: had risk awareness	0.757118388417334	0.787062696694649
9.1	25% subclinical	Mean incubation 4.5d	missed: undetectable	0.787062696694649	1
9.2	25% subclinical	Mean incubation 4.5d	detected: departure fever screen	0	0.505278530566836
9.2	25% subclinical	Mean incubation 4.5d	detected: departure risk screen	0.505278530566836	0.530014604038494
9.2	25% subclinical	Mean incubation 4.5d	detected: arrival fever screen	0.530014604038494	0.682655301381506
9.2	25% subclinical	Mean incubation 4.5d	detected: arrival risk screen	0.682655301381506	0.695182065800657
9.2	25% subclinical	Mean incubation 4.5d	missed: had both	0.695182065800657	0.702928868109419
9.2	25% subclinical	Mean incubation 4.5d	missed: had fever	0.702928868109419	0.758017240082836
9.2	25% subclinical	Mean incubation 4.5d	missed: had risk awareness	0.758017240082836	0.787850731031528
9.2	25% subclinical	Mean incubation 4.5d	missed: undetectable	0.787850731031528	1
9.3	25% subclinical	Mean incubation 4.5d	detected: departure fever screen	0	0.506440002583302
9.3	25% subclinical	Mean incubation 4.5d	detected: departure risk screen	0.506440002583302	0.531118002454137
9.3	25% subclinical	Mean incubation 4.5d	detected: arrival fever screen	0.531118002454137	0.683603550922767
9.3	25% subclinical	Mean incubation 4.5d	detected: arrival risk screen	0.683603550922767	0.696092884438974
9.3	25% subclinical	Mean incubation 4.5d	missed: had both	0.696092884438974	0.703831812650728
9.3	25% subclinical	Mean incubation 4.5d	missed: had fever	0.703831812650728	0.758864191045422
9.3	25% subclinical	Mean incubation 4.5d	missed: had risk awareness	0.758864191045422	0.788593263382288
9.3	25% subclinical	Mean incubation 4.5d	missed: undetectable	0.788593263382288	1
9.4	25% subclinical	Mean incubation 4.5d	detected: departure fever screen	0	0.507537529745164
9.4	25% subclinical	Mean incubation 4.5d	detected: departure risk screen	0.507537529745164	0.532160653257906
9.4	25% subclinical	Mean incubation 4.5d	detected: arrival fever screen	0.532160653257906	0.684497770557159
9.4	25% subclinical	Mean incubation 4.5d	detected: arrival risk screen	0.684497770557159	0.696951805929903
9.4	25% subclinical	Mean incubation 4.5d	missed: had both	0.696951805929903	0.704683200980805
9.4	25% subclinical	Mean incubation 4.5d	missed: had fever	0.704683200980805	0.759662010231663
9.4	25% subclinical	Mean incubation 4.5d	missed: had risk awareness	0.759662010231663	0.789292721298992
9.4	25% subclinical	Mean incubation 4.5d	missed: undetectable	0.789292721298992	1
9.5	25% subclinical	Mean incubation 4.5d	detected: departure fever screen	0	0.508574276648458
9.5	25% subclinical	Mean incubation 4.5d	detected: departure risk screen	0.508574276648458	0.533145562816035
9.5	25% subclinical	Mean incubation 4.5d	detected: arrival fever screen	0.533145562816035	0.685340785900683
9.5	25% subclinical	Mean incubation 4.5d	detected: arrival risk screen	0.685340785900683	0.697761544351972
9.5	25% subclinical	Mean incubation 4.5d	missed: had both	0.697761544351972	0.705485738004764
9.5	25% subclinical	Mean incubation 4.5d	missed: had fever	0.705485738004764	0.760413337313509
9.5	25% subclinical	Mean incubation 4.5d	missed: had risk awareness	0.760413337313509	0.789951419014583
9.5	25% subclinical	Mean incubation 4.5d	missed: undetectable	0.789951419014583	1
9.6	25% subclinical	Mean incubation 4.5d	detected: departure fever screen	0	0.509553280269623
9.6	25% subclinical	Mean incubation 4.5d	detected: departure risk screen	0.509553280269623	0.534075616256142
9.6	25% subclinical	Mean incubation 4.5d	detected: arrival fever screen	0.534075616256142	0.686135295270661
9.6	25% subclinical	Mean incubation 4.5d	detected: arrival risk screen	0.686135295270661	0.698524691509977
9.6	25% subclinical	Mean incubation 4.5d	missed: had both	0.698524691509977	0.706242006046428
9.6	25% subclinical	Mean incubation 4.5d	missed: had fever	0.706242006046428	0.761120687194525
9.6	25% subclinical	Mean incubation 4.5d	missed: had risk awareness	0.761120687194525	0.790571561376022
9.6	25% subclinical	Mean incubation 4.5d	missed: undetectable	0.790571561376022	1
9.7	25% subclinical	Mean incubation 4.5d	detected: departure fever screen	0	0.510477452620491
9.7	25% subclinical	Mean incubation 4.5d	detected: departure risk screen	0.510477452620491	0.534953579989466
9.7	25% subclinical	Mean incubation 4.5d	detected: arrival fever screen	0.534953579989466	0.686883873701125
9.7	25% subclinical	Mean incubation 4.5d	detected: arrival risk screen	0.686883873701125	0.69924372079187
9.7	25% subclinical	Mean incubation 4.5d	missed: had both	0.69924372079187	0.706954468780995
9.7	25% subclinical	Mean incubation 4.5d	missed: had fever	0.706954468780995	0.761786454481444
9.7	25% subclinical	Mean incubation 4.5d	missed: had risk awareness	0.761786454481444	0.791155247764553
9.7	25% subclinical	Mean incubation 4.5d	missed: undetectable	0.791155247764553	1
9.8	25% subclinical	Mean incubation 4.5d	detected: departure fever screen	0	0.511349583597128
9.8	25% subclinical	Mean incubation 4.5d	detected: departure risk screen	0.511349583597128	0.535782104417271
9.8	25% subclinical	Mean incubation 4.5d	detected: arrival fever screen	0.535782104417271	0.687588976990723
9.8	25% subclinical	Mean incubation 4.5d	detected: arrival risk screen	0.687588976990723	0.699920991056879
9.8	25% subclinical	Mean incubation 4.5d	missed: had both	0.699920991056879	0.707625475191246
9.8	25% subclinical	Mean incubation 4.5d	missed: had fever	0.707625475191246	0.762412917924522
9.8	25% subclinical	Mean incubation 4.5d	missed: had risk awareness	0.762412917924522	0.791704475988622
[truncated: 8,873 more rows]
