# Supplementary material for: Estimated effectiveness of symptom and risk screening to prevent the spread of COVID-19
Source: eLife. 2020 Feb 24;9:e55570. doi: 10.7554/eLife.55570 (PMC7060038; doi:10.7554/eLife.55570)
Supplement: Figure 3—source data 1. — Raw, simulated data, and source data for Figure 3—figures supplement 1, 2 can be found as. Rdata or. csv files in the supplementary code. [file elife-55570-fig3-data1.csv]

ff	screen_type	frac.missed	sc_type	scenario
0.5	departure.only	0.9	departure	50% subclinical
0.5	arrival.only	0.833333333333333	arrival	50% subclinical
0.5	both	0.866666666666667	both	50% subclinical
0.5	departure.only	0.833333333333333	departure	50% subclinical
0.5	arrival.only	0.8	arrival	50% subclinical
0.5	both	0.666666666666667	both	50% subclinical
0.5	departure.only	0.9	departure	50% subclinical
0.5	arrival.only	0.8	arrival	50% subclinical
0.5	both	0.8	both	50% subclinical
0.5	departure.only	0.8	departure	50% subclinical
0.5	arrival.only	0.933333333333333	arrival	50% subclinical
0.5	both	0.966666666666667	both	50% subclinical
0.5	departure.only	0.8	departure	50% subclinical
0.5	arrival.only	0.8	arrival	50% subclinical
0.5	both	0.766666666666667	both	50% subclinical
0.5	departure.only	0.933333333333333	departure	50% subclinical
0.5	arrival.only	0.966666666666667	arrival	50% subclinical
0.5	both	0.833333333333333	both	50% subclinical
0.5	departure.only	0.866666666666667	departure	50% subclinical
0.5	arrival.only	0.866666666666667	arrival	50% subclinical
0.5	both	0.866666666666667	both	50% subclinical
0.5	departure.only	0.8	departure	50% subclinical
0.5	arrival.only	0.833333333333333	arrival	50% subclinical
0.5	both	0.766666666666667	both	50% subclinical
0.5	departure.only	0.933333333333333	departure	50% subclinical
0.5	arrival.only	0.9	arrival	50% subclinical
0.5	both	0.766666666666667	both	50% subclinical
0.5	departure.only	0.833333333333333	departure	50% subclinical
0.5	arrival.only	0.833333333333333	arrival	50% subclinical
0.5	both	0.833333333333333	both	50% subclinical
0.5	departure.only	0.833333333333333	departure	50% subclinical
0.5	arrival.only	0.8	arrival	50% subclinical
0.5	both	0.866666666666667	both	50% subclinical
0.5	departure.only	0.866666666666667	departure	50% subclinical
0.5	arrival.only	0.866666666666667	arrival	50% subclinical
0.5	both	0.766666666666667	both	50% subclinical
0.5	departure.only	0.933333333333333	departure	50% subclinical
0.5	arrival.only	0.766666666666667	arrival	50% subclinical
0.5	both	0.733333333333333	both	50% subclinical
0.5	departure.only	0.866666666666667	departure	50% subclinical
0.5	arrival.only	0.8	arrival	50% subclinical
0.5	both	0.733333333333333	both	50% subclinical
0.5	departure.only	0.9	departure	50% subclinical
0.5	arrival.only	0.766666666666667	arrival	50% subclinical
0.5	both	0.8	both	50% subclinical
0.5	departure.only	0.9	departure	50% subclinical
0.5	arrival.only	0.9	arrival	50% subclinical
0.5	both	0.933333333333333	both	50% subclinical
0.5	departure.only	0.9	departure	50% subclinical
0.5	arrival.only	0.833333333333333	arrival	50% subclinical
0.5	both	0.8	both	50% subclinical
0.5	departure.only	1	departure	50% subclinical
0.5	arrival.only	0.9	arrival	50% subclinical
0.5	both	0.8	both	50% subclinical
0.5	departure.only	0.8	departure	50% subclinical
0.5	arrival.only	0.833333333333333	arrival	50% subclinical
0.5	both	0.833333333333333	both	50% subclinical
0.5	departure.only	0.866666666666667	departure	50% subclinical
0.5	arrival.only	0.833333333333333	arrival	50% subclinical
0.5	both	0.8	both	50% subclinical
0.5	departure.only	0.866666666666667	departure	50% subclinical
0.5	arrival.only	0.9	arrival	50% subclinical
0.5	both	0.8	both	50% subclinical
0.5	departure.only	0.866666666666667	departure	50% subclinical
0.5	arrival.only	0.833333333333333	arrival	50% subclinical
0.5	both	0.833333333333333	both	50% subclinical
0.5	departure.only	0.933333333333333	departure	50% subclinical
0.5	arrival.only	0.866666666666667	arrival	50% subclinical
0.5	both	0.633333333333333	both	50% subclinical
0.5	departure.only	0.8	departure	50% subclinical
0.5	arrival.only	0.833333333333333	arrival	50% subclinical
0.5	both	0.933333333333333	both	50% subclinical
0.5	departure.only	0.833333333333333	departure	50% subclinical
0.5	arrival.only	0.9	arrival	50% subclinical
0.5	both	0.933333333333333	both	50% subclinical
0.5	departure.only	0.7	departure	50% subclinical
0.5	arrival.only	0.766666666666667	arrival	50% subclinical
0.5	both	0.866666666666667	both	50% subclinical
0.5	departure.only	0.966666666666667	departure	50% subclinical
0.5	arrival.only	0.866666666666667	arrival	50% subclinical
0.5	both	0.833333333333333	both	50% subclinical
0.5	departure.only	0.966666666666667	departure	50% subclinical
0.5	arrival.only	0.833333333333333	arrival	50% subclinical
0.5	both	0.733333333333333	both	50% subclinical
0.5	departure.only	0.966666666666667	departure	50% subclinical
0.5	arrival.only	0.933333333333333	arrival	50% subclinical
0.5	both	0.9	both	50% subclinical
0.5	departure.only	0.766666666666667	departure	50% subclinical
0.5	arrival.only	0.933333333333333	arrival	50% subclinical
0.5	both	0.633333333333333	both	50% subclinical
0.5	departure.only	0.866666666666667	departure	50% subclinical
0.5	arrival.only	0.866666666666667	arrival	50% subclinical
0.5	both	0.766666666666667	both	50% subclinical
0.5	departure.only	0.966666666666667	departure	50% subclinical
0.5	arrival.only	0.866666666666667	arrival	50% subclinical
0.5	both	0.766666666666667	both	50% subclinical
0.5	departure.only	0.733333333333333	departure	50% subclinical
0.5	arrival.only	0.833333333333333	arrival	50% subclinical
0.5	both	0.8	both	50% subclinical
0.5	departure.only	0.9	departure	50% subclinical
0.5	arrival.only	0.933333333333333	arrival	50% subclinical
0.5	both	0.766666666666667	both	50% subclinical
0.5	departure.only	0.966666666666667	departure	50% subclinical
0.5	arrival.only	0.966666666666667	arrival	50% subclinical
0.5	both	0.933333333333333	both	50% subclinical
0.5	departure.only	0.9	departure	50% subclinical
0.5	arrival.only	0.8	arrival	50% subclinical
0.5	both	0.9	both	50% subclinical
0.5	departure.only	0.866666666666667	departure	50% subclinical
0.5	arrival.only	0.9	arrival	50% subclinical
0.5	both	0.9	both	50% subclinical
0.5	departure.only	0.7	departure	50% subclinical
0.5	arrival.only	0.8	arrival	50% subclinical
0.5	both	0.766666666666667	both	50% subclinical
0.5	departure.only	0.9	departure	50% subclinical
0.5	arrival.only	0.966666666666667	arrival	50% subclinical
0.5	both	0.866666666666667	both	50% subclinical
0.5	departure.only	0.866666666666667	departure	50% subclinical
0.5	arrival.only	0.733333333333333	arrival	50% subclinical
0.5	both	0.866666666666667	both	50% subclinical
0.5	departure.only	0.833333333333333	departure	50% subclinical
0.5	arrival.only	1	arrival	50% subclinical
0.5	both	0.8	both	50% subclinical
0.5	departure.only	0.833333333333333	departure	50% subclinical
0.5	arrival.only	0.866666666666667	arrival	50% subclinical
0.5	both	0.8	both	50% subclinical
0.5	departure.only	0.8	departure	50% subclinical
0.5	arrival.only	0.766666666666667	arrival	50% subclinical
0.5	both	0.766666666666667	both	50% subclinical
0.5	departure.only	0.933333333333333	departure	50% subclinical
0.5	arrival.only	0.866666666666667	arrival	50% subclinical
0.5	both	0.866666666666667	both	50% subclinical
0.5	departure.only	0.933333333333333	departure	50% subclinical
0.5	arrival.only	0.833333333333333	arrival	50% subclinical
0.5	both	0.9	both	50% subclinical
0.5	departure.only	0.9	departure	50% subclinical
0.5	arrival.only	0.833333333333333	arrival	50% subclinical
0.5	both	0.666666666666667	both	50% subclinical
0.5	departure.only	0.966666666666667	departure	50% subclinical
0.5	arrival.only	0.933333333333333	arrival	50% subclinical
0.5	both	0.866666666666667	both	50% subclinical
0.5	departure.only	0.866666666666667	departure	50% subclinical
0.5	arrival.only	0.866666666666667	arrival	50% subclinical
0.5	both	0.933333333333333	both	50% subclinical
0.5	departure.only	0.9	departure	50% subclinical
0.5	arrival.only	0.8	arrival	50% subclinical
0.5	both	0.866666666666667	both	50% subclinical
0.5	departure.only	0.933333333333333	departure	50% subclinical
0.5	arrival.only	0.8	arrival	50% subclinical
0.5	both	0.9	both	50% subclinical
0.5	departure.only	0.866666666666667	departure	50% subclinical
0.5	arrival.only	0.866666666666667	arrival	50% subclinical
0.5	both	0.733333333333333	both	50% subclinical
0.5	departure.only	0.8	departure	50% subclinical
0.5	arrival.only	0.866666666666667	arrival	50% subclinical
0.5	both	0.766666666666667	both	50% subclinical
0.5	departure.only	0.966666666666667	departure	50% subclinical
0.5	arrival.only	0.933333333333333	arrival	50% subclinical
0.5	both	0.833333333333333	both	50% subclinical
0.5	departure.only	0.833333333333333	departure	50% subclinical
0.5	arrival.only	0.666666666666667	arrival	50% subclinical
0.5	both	0.766666666666667	both	50% subclinical
0.5	departure.only	0.933333333333333	departure	50% subclinical
0.5	arrival.only	0.733333333333333	arrival	50% subclinical
0.5	both	0.666666666666667	both	50% subclinical
0.5	departure.only	0.766666666666667	departure	50% subclinical
0.5	arrival.only	0.766666666666667	arrival	50% subclinical
0.5	both	0.733333333333333	both	50% subclinical
0.5	departure.only	0.933333333333333	departure	50% subclinical
0.5	arrival.only	0.833333333333333	arrival	50% subclinical
0.5	both	0.866666666666667	both	50% subclinical
0.5	departure.only	0.933333333333333	departure	50% subclinical
0.5	arrival.only	0.866666666666667	arrival	50% subclinical
0.5	both	0.766666666666667	both	50% subclinical
0.5	departure.only	0.866666666666667	departure	50% subclinical
0.5	arrival.only	0.8	arrival	50% subclinical
0.5	both	0.733333333333333	both	50% subclinical
0.5	departure.only	0.933333333333333	departure	50% subclinical
0.5	arrival.only	0.933333333333333	arrival	50% subclinical
0.5	both	0.9	both	50% subclinical
0.5	departure.only	0.9	departure	50% subclinical
0.5	arrival.only	0.833333333333333	arrival	50% subclinical
0.5	both	0.8	both	50% subclinical
0.5	departure.only	0.9	departure	50% subclinical
0.5	arrival.only	0.733333333333333	arrival	50% subclinical
0.5	both	0.866666666666667	both	50% subclinical
0.5	departure.only	0.9	departure	50% subclinical
0.5	arrival.only	0.966666666666667	arrival	50% subclinical
0.5	both	0.8	both	50% subclinical
0.5	departure.only	0.966666666666667	departure	50% subclinical
0.5	arrival.only	0.966666666666667	arrival	50% subclinical
0.5	both	0.733333333333333	both	50% subclinical
0.5	departure.only	0.933333333333333	departure	50% subclinical
0.5	arrival.only	0.933333333333333	arrival	50% subclinical
0.5	both	0.833333333333333	both	50% subclinical
0.5	departure.only	0.866666666666667	departure	50% subclinical
0.5	arrival.only	0.9	arrival	50% subclinical
0.5	both	0.8	both	50% subclinical
0.5	departure.only	0.733333333333333	departure	50% subclinical
0.5	arrival.only	0.766666666666667	arrival	50% subclinical
0.5	both	0.766666666666667	both	50% subclinical
0.5	departure.only	0.833333333333333	departure	50% subclinical
0.5	arrival.only	0.766666666666667	arrival	50% subclinical
0.5	both	0.8	both	50% subclinical
0.5	departure.only	0.933333333333333	departure	50% subclinical
0.5	arrival.only	0.966666666666667	arrival	50% subclinical
0.5	both	0.866666666666667	both	50% subclinical
0.5	departure.only	0.9	departure	50% subclinical
0.5	arrival.only	0.8	arrival	50% subclinical
0.5	both	0.733333333333333	both	50% subclinical
0.5	departure.only	0.9	departure	50% subclinical
0.5	arrival.only	0.866666666666667	arrival	50% subclinical
0.5	both	0.9	both	50% subclinical
0.5	departure.only	0.733333333333333	departure	50% subclinical
0.5	arrival.only	0.9	arrival	50% subclinical
0.5	both	0.766666666666667	both	50% subclinical
0.5	departure.only	0.866666666666667	departure	50% subclinical
0.5	arrival.only	0.833333333333333	arrival	50% subclinical
0.5	both	0.7	both	50% subclinical
0.5	departure.only	0.866666666666667	departure	50% subclinical
0.5	arrival.only	0.866666666666667	arrival	50% subclinical
0.5	both	0.833333333333333	both	50% subclinical
0.5	departure.only	0.9	departure	50% subclinical
0.5	arrival.only	0.866666666666667	arrival	50% subclinical
0.5	both	0.8	both	50% subclinical
0.5	departure.only	0.933333333333333	departure	50% subclinical
0.5	arrival.only	0.933333333333333	arrival	50% subclinical
0.5	both	0.633333333333333	both	50% subclinical
0.5	departure.only	0.866666666666667	departure	50% subclinical
0.5	arrival.only	0.833333333333333	arrival	50% subclinical
0.5	both	0.8	both	50% subclinical
0.5	departure.only	0.8	departure	50% subclinical
0.5	arrival.only	0.8	arrival	50% subclinical
0.5	both	0.7	both	50% subclinical
0.5	departure.only	0.933333333333333	departure	50% subclinical
0.5	arrival.only	0.866666666666667	arrival	50% subclinical
0.5	both	0.833333333333333	both	50% subclinical
0.5	departure.only	0.933333333333333	departure	50% subclinical
0.5	arrival.only	0.9	arrival	50% subclinical
0.5	both	0.866666666666667	both	50% subclinical
0.5	departure.only	0.933333333333333	departure	50% subclinical
0.5	arrival.only	0.933333333333333	arrival	50% subclinical
0.5	both	0.866666666666667	both	50% subclinical
0.5	departure.only	0.833333333333333	departure	50% subclinical
0.5	arrival.only	0.666666666666667	arrival	50% subclinical
0.5	both	0.9	both	50% subclinical
0.5	departure.only	0.833333333333333	departure	50% subclinical
0.5	arrival.only	0.9	arrival	50% subclinical
0.5	both	0.833333333333333	both	50% subclinical
0.5	departure.only	0.866666666666667	departure	50% subclinical
0.5	arrival.only	0.866666666666667	arrival	50% subclinical
0.5	both	0.733333333333333	both	50% subclinical
0.5	departure.only	0.833333333333333	departure	50% subclinical
0.5	arrival.only	0.833333333333333	arrival	50% subclinical
0.5	both	0.833333333333333	both	50% subclinical
0.5	departure.only	0.766666666666667	departure	50% subclinical
0.5	arrival.only	0.666666666666667	arrival	50% subclinical
0.5	both	0.833333333333333	both	50% subclinical
0.5	departure.only	0.966666666666667	departure	50% subclinical
0.5	arrival.only	0.866666666666667	arrival	50% subclinical
0.5	both	0.933333333333333	both	50% subclinical
0.5	departure.only	0.833333333333333	departure	50% subclinical
0.5	arrival.only	0.866666666666667	arrival	50% subclinical
0.5	both	0.8	both	50% subclinical
0.5	departure.only	0.866666666666667	departure	50% subclinical
0.5	arrival.only	0.8	arrival	50% subclinical
0.5	both	0.533333333333333	both	50% subclinical
0.5	departure.only	0.933333333333333	departure	50% subclinical
0.5	arrival.only	0.9	arrival	50% subclinical
0.5	both	0.933333333333333	both	50% subclinical
0.5	departure.only	1	departure	50% subclinical
0.5	arrival.only	0.9	arrival	50% subclinical
0.5	both	0.766666666666667	both	50% subclinical
0.5	departure.only	0.866666666666667	departure	50% subclinical
0.5	arrival.only	0.833333333333333	arrival	50% subclinical
0.5	both	0.8	both	50% subclinical
0.5	departure.only	0.9	departure	50% subclinical
0.5	arrival.only	0.933333333333333	arrival	50% subclinical
0.5	both	0.8	both	50% subclinical
0.5	departure.only	0.766666666666667	departure	50% subclinical
0.5	arrival.only	0.833333333333333	arrival	50% subclinical
0.5	both	0.8	both	50% subclinical
0.5	departure.only	0.933333333333333	departure	50% subclinical
0.5	arrival.only	0.966666666666667	arrival	50% subclinical
0.5	both	0.766666666666667	both	50% subclinical
0.5	departure.only	0.966666666666667	departure	50% subclinical
0.5	arrival.only	0.9	arrival	50% subclinical
0.5	both	0.933333333333333	both	50% subclinical
0.5	departure.only	0.933333333333333	departure	50% subclinical
0.5	arrival.only	0.9	arrival	50% subclinical
0.5	both	0.9	both	50% subclinical
0.5	departure.only	0.966666666666667	departure	50% subclinical
0.5	arrival.only	0.933333333333333	arrival	50% subclinical
0.5	both	0.9	both	50% subclinical
0.5	departure.only	0.9	departure	50% subclinical
0.5	arrival.only	0.866666666666667	arrival	50% subclinical
0.5	both	0.8	both	50% subclinical
0.5	departure.only	0.833333333333333	departure	50% subclinical
0.5	arrival.only	0.8	arrival	50% subclinical
0.5	both	0.733333333333333	both	50% subclinical
0.5	departure.only	0.833333333333333	departure	50% subclinical
0.5	arrival.only	0.966666666666667	arrival	50% subclinical
0.5	both	0.9	both	50% subclinical
0.5	departure.only	0.833333333333333	departure	50% subclinical
0.5	arrival.only	0.866666666666667	arrival	50% subclinical
0.5	both	0.9	both	50% subclinical
0.5	departure.only	0.866666666666667	departure	50% subclinical
0.5	arrival.only	0.733333333333333	arrival	50% subclinical
0.5	both	0.766666666666667	both	50% subclinical
0.5	departure.only	0.9	departure	50% subclinical
0.5	arrival.only	0.9	arrival	50% subclinical
0.5	both	0.8	both	50% subclinical
0.5	departure.only	0.866666666666667	departure	50% subclinical
0.5	arrival.only	0.9	arrival	50% subclinical
0.5	both	0.866666666666667	both	50% subclinical
0.5	departure.only	0.866666666666667	departure	50% subclinical
0.5	arrival.only	0.766666666666667	arrival	50% subclinical
0.5	both	0.833333333333333	both	50% subclinical
0.5	departure.only	0.866666666666667	departure	50% subclinical
0.5	arrival.only	0.833333333333333	arrival	50% subclinical
0.5	both	0.7	both	50% subclinical
0.5	departure.only	0.8	departure	50% subclinical
0.5	arrival.only	0.866666666666667	arrival	50% subclinical
0.5	both	0.666666666666667	both	50% subclinical
0.5	departure.only	0.933333333333333	departure	50% subclinical
0.5	arrival.only	0.833333333333333	arrival	50% subclinical
0.5	both	0.866666666666667	both	50% subclinical
0.5	departure.only	0.9	departure	50% subclinical
0.5	arrival.only	0.8	arrival	50% subclinical
0.5	both	0.666666666666667	both	50% subclinical
0.5	departure.only	0.933333333333333	departure	50% subclinical
0.5	arrival.only	0.833333333333333	arrival	50% subclinical
0.5	both	0.866666666666667	both	50% subclinical
0.5	departure.only	0.866666666666667	departure	50% subclinical
0.5	arrival.only	0.866666666666667	arrival	50% subclinical
0.5	both	0.7	both	50% subclinical
0.5	departure.only	0.9	departure	50% subclinical
0.5	arrival.only	0.866666666666667	arrival	50% subclinical
0.5	both	0.733333333333333	both	50% subclinical
0.5	departure.only	0.866666666666667	departure	50% subclinical
0.5	arrival.only	0.8	arrival	50% subclinical
0.5	both	0.8	both	50% subclinical
0.5	departure.only	0.9	departure	50% subclinical
0.5	arrival.only	0.9	arrival	50% subclinical
0.5	both	0.966666666666667	both	50% subclinical
0.5	departure.only	0.866666666666667	departure	50% subclinical
0.5	arrival.only	0.8	arrival	50% subclinical
0.5	both	0.8	both	50% subclinical
0.5	departure.only	0.833333333333333	departure	50% subclinical
0.5	arrival.only	0.833333333333333	arrival	50% subclinical
0.5	both	0.9	both	50% subclinical
0.5	departure.only	0.833333333333333	departure	50% subclinical
0.5	arrival.only	0.933333333333333	arrival	50% subclinical
0.5	both	0.833333333333333	both	50% subclinical
0.5	departure.only	0.9	departure	50% subclinical
0.5	arrival.only	0.9	arrival	50% subclinical
0.5	both	0.8	both	50% subclinical
0.5	departure.only	0.966666666666667	departure	50% subclinical
0.5	arrival.only	0.766666666666667	arrival	50% subclinical
0.5	both	0.933333333333333	both	50% subclinical
0.5	departure.only	0.933333333333333	departure	50% subclinical
0.5	arrival.only	0.933333333333333	arrival	50% subclinical
0.5	both	0.933333333333333	both	50% subclinical
0.5	departure.only	0.933333333333333	departure	50% subclinical
0.5	arrival.only	0.866666666666667	arrival	50% subclinical
0.5	both	0.733333333333333	both	50% subclinical
0.5	departure.only	0.733333333333333	departure	50% subclinical
0.5	arrival.only	0.933333333333333	arrival	50% subclinical
0.5	both	0.733333333333333	both	50% subclinical
0.5	departure.only	0.933333333333333	departure	50% subclinical
0.5	arrival.only	0.9	arrival	50% subclinical
0.5	both	0.8	both	50% subclinical
0.5	departure.only	0.9	departure	50% subclinical
0.5	arrival.only	0.8	arrival	50% subclinical
0.5	both	0.766666666666667	both	50% subclinical
0.5	departure.only	0.9	departure	50% subclinical
0.5	arrival.only	0.866666666666667	arrival	50% subclinical
0.5	both	0.833333333333333	both	50% subclinical
0.5	departure.only	0.866666666666667	departure	50% subclinical
0.5	arrival.only	0.933333333333333	arrival	50% subclinical
0.5	both	0.833333333333333	both	50% subclinical
0.5	departure.only	0.933333333333333	departure	50% subclinical
0.5	arrival.only	0.8	arrival	50% subclinical
0.5	both	0.833333333333333	both	50% subclinical
0.5	departure.only	0.966666666666667	departure	50% subclinical
0.5	arrival.only	0.966666666666667	arrival	50% subclinical
0.5	both	0.8	both	50% subclinical
0.5	departure.only	0.833333333333333	departure	50% subclinical
0.5	arrival.only	0.666666666666667	arrival	50% subclinical
0.5	both	0.933333333333333	both	50% subclinical
0.5	departure.only	0.733333333333333	departure	50% subclinical
0.5	arrival.only	0.866666666666667	arrival	50% subclinical
0.5	both	0.8	both	50% subclinical
0.5	departure.only	0.733333333333333	departure	50% subclinical
0.5	arrival.only	0.766666666666667	arrival	50% subclinical
0.5	both	0.8	both	50% subclinical
0.5	departure.only	0.9	departure	50% subclinical
0.5	arrival.only	0.866666666666667	arrival	50% subclinical
0.5	both	0.766666666666667	both	50% subclinical
0.5	departure.only	0.8	departure	50% subclinical
0.5	arrival.only	0.766666666666667	arrival	50% subclinical
0.5	both	0.766666666666667	both	50% subclinical
0.5	departure.only	0.9	departure	50% subclinical
0.5	arrival.only	0.966666666666667	arrival	50% subclinical
0.5	both	0.833333333333333	both	50% subclinical
0.5	departure.only	0.866666666666667	departure	50% subclinical
0.5	arrival.only	0.766666666666667	arrival	50% subclinical
0.5	both	0.7	both	50% subclinical
0.5	departure.only	0.933333333333333	departure	50% subclinical
0.5	arrival.only	0.9	arrival	50% subclinical
0.5	both	0.866666666666667	both	50% subclinical
0.5	departure.only	0.933333333333333	departure	50% subclinical
0.5	arrival.only	0.8	arrival	50% subclinical
0.5	both	0.866666666666667	both	50% subclinical
0.5	departure.only	0.933333333333333	departure	50% subclinical
0.5	arrival.only	0.833333333333333	arrival	50% subclinical
0.5	both	0.8	both	50% subclinical
0.5	departure.only	0.833333333333333	departure	50% subclinical
0.5	arrival.only	0.833333333333333	arrival	50% subclinical
0.5	both	0.833333333333333	both	50% subclinical
0.5	departure.only	0.866666666666667	departure	50% subclinical
0.5	arrival.only	0.833333333333333	arrival	50% subclinical
0.5	both	0.9	both	50% subclinical
0.5	departure.only	0.833333333333333	departure	50% subclinical
0.5	arrival.only	0.9	arrival	50% subclinical
0.5	both	0.6	both	50% subclinical
0.5	departure.only	0.833333333333333	departure	50% subclinical
0.5	arrival.only	0.733333333333333	arrival	50% subclinical
0.5	both	0.766666666666667	both	50% subclinical
0.5	departure.only	1	departure	50% subclinical
0.5	arrival.only	0.833333333333333	arrival	50% subclinical
0.5	both	0.9	both	50% subclinical
0.5	departure.only	1	departure	50% subclinical
0.5	arrival.only	0.9	arrival	50% subclinical
0.5	both	0.933333333333333	both	50% subclinical
0.5	departure.only	0.866666666666667	departure	50% subclinical
0.5	arrival.only	0.766666666666667	arrival	50% subclinical
0.5	both	0.7	both	50% subclinical
0.5	departure.only	0.866666666666667	departure	50% subclinical
0.5	arrival.only	0.833333333333333	arrival	50% subclinical
0.5	both	0.933333333333333	both	50% subclinical
0.5	departure.only	0.933333333333333	departure	50% subclinical
0.5	arrival.only	0.833333333333333	arrival	50% subclinical
0.5	both	0.766666666666667	both	50% subclinical
0.5	departure.only	0.9	departure	50% subclinical
0.5	arrival.only	0.833333333333333	arrival	50% subclinical
0.5	both	0.733333333333333	both	50% subclinical
0.5	departure.only	0.866666666666667	departure	50% subclinical
0.5	arrival.only	0.766666666666667	arrival	50% subclinical
0.5	both	0.766666666666667	both	50% subclinical
0.5	departure.only	0.933333333333333	departure	50% subclinical
0.5	arrival.only	0.866666666666667	arrival	50% subclinical
0.5	both	0.866666666666667	both	50% subclinical
0.5	departure.only	0.966666666666667	departure	50% subclinical
0.5	arrival.only	0.933333333333333	arrival	50% subclinical
0.5	both	0.766666666666667	both	50% subclinical
0.5	departure.only	0.866666666666667	departure	50% subclinical
0.5	arrival.only	0.833333333333333	arrival	50% subclinical
0.5	both	0.766666666666667	both	50% subclinical
0.5	departure.only	0.9	departure	50% subclinical
0.5	arrival.only	0.766666666666667	arrival	50% subclinical
0.5	both	0.866666666666667	both	50% subclinical
0.5	departure.only	0.9	departure	50% subclinical
0.5	arrival.only	0.866666666666667	arrival	50% subclinical
0.5	both	0.6	both	50% subclinical
0.5	departure.only	0.966666666666667	departure	50% subclinical
0.5	arrival.only	0.666666666666667	arrival	50% subclinical
0.5	both	0.733333333333333	both	50% subclinical
0.5	departure.only	0.9	departure	50% subclinical
0.5	arrival.only	0.833333333333333	arrival	50% subclinical
0.5	both	0.566666666666667	both	50% subclinical
0.5	departure.only	0.966666666666667	departure	50% subclinical
0.5	arrival.only	0.833333333333333	arrival	50% subclinical
0.5	both	0.866666666666667	both	50% subclinical
0.5	departure.only	0.966666666666667	departure	50% subclinical
0.5	arrival.only	0.866666666666667	arrival	50% subclinical
0.5	both	0.766666666666667	both	50% subclinical
0.5	departure.only	0.966666666666667	departure	50% subclinical
0.5	arrival.only	0.966666666666667	arrival	50% subclinical
0.5	both	0.766666666666667	both	50% subclinical
0.5	departure.only	0.933333333333333	departure	50% subclinical
0.5	arrival.only	0.9	arrival	50% subclinical
0.5	both	0.7	both	50% subclinical
0.5	departure.only	0.933333333333333	departure	50% subclinical
0.5	arrival.only	0.8	arrival	50% subclinical
0.5	both	0.866666666666667	both	50% subclinical
0.5	departure.only	0.866666666666667	departure	50% subclinical
0.5	arrival.only	0.866666666666667	arrival	50% subclinical
0.5	both	0.8	both	50% subclinical
0.5	departure.only	0.866666666666667	departure	50% subclinical
0.5	arrival.only	0.833333333333333	arrival	50% subclinical
0.5	both	0.9	both	50% subclinical
0.5	departure.only	0.966666666666667	departure	50% subclinical
0.5	arrival.only	0.9	arrival	50% subclinical
0.5	both	0.733333333333333	both	50% subclinical
0.5	departure.only	0.733333333333333	departure	50% subclinical
0.5	arrival.only	0.933333333333333	arrival	50% subclinical
0.5	both	0.733333333333333	both	50% subclinical
0.5	departure.only	0.9	departure	50% subclinical
0.5	arrival.only	0.766666666666667	arrival	50% subclinical
0.5	both	0.833333333333333	both	50% subclinical
0.5	departure.only	0.9	departure	50% subclinical
0.5	arrival.only	0.833333333333333	arrival	50% subclinical
0.5	both	0.833333333333333	both	50% subclinical
0.5	departure.only	0.9	departure	50% subclinical
0.5	arrival.only	0.933333333333333	arrival	50% subclinical
0.5	both	0.833333333333333	both	50% subclinical
0.5	departure.only	0.9	departure	50% subclinical
0.5	arrival.only	0.866666666666667	arrival	50% subclinical
0.5	both	0.733333333333333	both	50% subclinical
0.5	departure.only	0.933333333333333	departure	50% subclinical
0.5	arrival.only	0.766666666666667	arrival	50% subclinical
0.5	both	0.766666666666667	both	50% subclinical
0.5	departure.only	0.966666666666667	departure	50% subclinical
0.5	arrival.only	0.9	arrival	50% subclinical
0.5	both	0.9	both	50% subclinical
0.5	departure.only	0.9	departure	50% subclinical
0.5	arrival.only	0.666666666666667	arrival	50% subclinical
0.5	both	0.666666666666667	both	50% subclinical
0.5	departure.only	0.8	departure	50% subclinical
0.5	arrival.only	0.8	arrival	50% subclinical
0.5	both	0.766666666666667	both	50% subclinical
0.5	departure.only	0.966666666666667	departure	50% subclinical
0.5	arrival.only	0.966666666666667	arrival	50% subclinical
0.5	both	0.933333333333333	both	50% subclinical
0.5	departure.only	0.8	departure	50% subclinical
0.5	arrival.only	0.7	arrival	50% subclinical
0.5	both	0.8	both	50% subclinical
0.5	departure.only	0.8	departure	50% subclinical
0.5	arrival.only	0.7	arrival	50% subclinical
0.5	both	0.733333333333333	both	50% subclinical
0.5	departure.only	0.9	departure	50% subclinical
0.5	arrival.only	0.866666666666667	arrival	50% subclinical
0.5	both	0.833333333333333	both	50% subclinical
0.5	departure.only	0.9	departure	50% subclinical
0.5	arrival.only	0.933333333333333	arrival	50% subclinical
0.5	both	0.8	both	50% subclinical
0.5	departure.only	0.833333333333333	departure	50% subclinical
0.5	arrival.only	0.8	arrival	50% subclinical
0.5	both	0.833333333333333	both	50% subclinical
0.5	departure.only	0.933333333333333	departure	50% subclinical
0.5	arrival.only	0.833333333333333	arrival	50% subclinical
0.5	both	0.766666666666667	both	50% subclinical
0.5	departure.only	0.833333333333333	departure	50% subclinical
0.5	arrival.only	0.8	arrival	50% subclinical
0.5	both	0.7	both	50% subclinical
0.5	departure.only	0.866666666666667	departure	50% subclinical
0.5	arrival.only	0.866666666666667	arrival	50% subclinical
0.5	both	0.766666666666667	both	50% subclinical
0.5	departure.only	0.933333333333333	departure	50% subclinical
0.5	arrival.only	0.833333333333333	arrival	50% subclinical
0.5	both	0.866666666666667	both	50% subclinical
0.5	departure.only	0.866666666666667	departure	50% subclinical
0.5	arrival.only	0.966666666666667	arrival	50% subclinical
0.5	both	0.866666666666667	both	50% subclinical
0.5	departure.only	0.9	departure	50% subclinical
0.5	arrival.only	0.7	arrival	50% subclinical
0.5	both	0.933333333333333	both	50% subclinical
0.5	departure.only	0.9	departure	50% subclinical
0.5	arrival.only	0.9	arrival	50% subclinical
0.5	both	0.866666666666667	both	50% subclinical
0.5	departure.only	0.9	departure	50% subclinical
0.5	arrival.only	0.9	arrival	50% subclinical
0.5	both	0.833333333333333	both	50% subclinical
0.5	departure.only	0.9	departure	50% subclinical
0.5	arrival.only	0.833333333333333	arrival	50% subclinical
0.5	both	0.866666666666667	both	50% subclinical
0.5	departure.only	0.833333333333333	departure	50% subclinical
0.5	arrival.only	0.9	arrival	50% subclinical
0.5	both	0.633333333333333	both	50% subclinical
0.5	departure.only	0.833333333333333	departure	50% subclinical
0.5	arrival.only	0.933333333333333	arrival	50% subclinical
0.5	both	0.866666666666667	both	50% subclinical
0.5	departure.only	0.933333333333333	departure	50% subclinical
0.5	arrival.only	0.8	arrival	50% subclinical
0.5	both	0.733333333333333	both	50% subclinical
0.5	departure.only	0.9	departure	50% subclinical
0.5	arrival.only	0.866666666666667	arrival	50% subclinical
0.5	both	0.766666666666667	both	50% subclinical
0.5	departure.only	0.7	departure	50% subclinical
0.5	arrival.only	0.866666666666667	arrival	50% subclinical
0.5	both	0.9	both	50% subclinical
0.5	departure.only	0.866666666666667	departure	50% subclinical
0.5	arrival.only	0.933333333333333	arrival	50% subclinical
0.5	both	0.733333333333333	both	50% subclinical
0.5	departure.only	0.966666666666667	departure	50% subclinical
0.5	arrival.only	0.933333333333333	arrival	50% subclinical
0.5	both	0.9	both	50% subclinical
0.5	departure.only	0.9	departure	50% subclinical
0.5	arrival.only	0.966666666666667	arrival	50% subclinical
0.5	both	0.866666666666667	both	50% subclinical
0.5	departure.only	0.966666666666667	departure	50% subclinical
0.5	arrival.only	0.933333333333333	arrival	50% subclinical
0.5	both	0.833333333333333	both	50% subclinical
0.5	departure.only	0.9	departure	50% subclinical
0.5	arrival.only	0.9	arrival	50% subclinical
0.5	both	0.966666666666667	both	50% subclinical
0.5	departure.only	1	departure	50% subclinical
0.5	arrival.only	0.766666666666667	arrival	50% subclinical
0.5	both	0.866666666666667	both	50% subclinical
0.5	departure.only	0.9	departure	50% subclinical
0.5	arrival.only	0.866666666666667	arrival	50% subclinical
0.5	both	0.833333333333333	both	50% subclinical
0.5	departure.only	0.9	departure	50% subclinical
0.5	arrival.only	0.833333333333333	arrival	50% subclinical
0.5	both	0.866666666666667	both	50% subclinical
0.5	departure.only	0.9	departure	50% subclinical
0.5	arrival.only	0.866666666666667	arrival	50% subclinical
0.5	both	0.933333333333333	both	50% subclinical
0.5	departure.only	0.833333333333333	departure	50% subclinical
0.5	arrival.only	0.866666666666667	arrival	50% subclinical
0.5	both	0.866666666666667	both	50% subclinical
0.5	departure.only	0.9	departure	50% subclinical
0.5	arrival.only	0.933333333333333	arrival	50% subclinical
0.5	both	0.9	both	50% subclinical
0.5	departure.only	0.933333333333333	departure	50% subclinical
0.5	arrival.only	0.866666666666667	arrival	50% subclinical
0.5	both	0.566666666666667	both	50% subclinical
0.5	departure.only	0.833333333333333	departure	50% subclinical
0.5	arrival.only	0.833333333333333	arrival	50% subclinical
0.5	both	0.833333333333333	both	50% subclinical
0.5	departure.only	0.9	departure	50% subclinical
0.5	arrival.only	0.933333333333333	arrival	50% subclinical
0.5	both	0.9	both	50% subclinical
0.5	departure.only	0.9	departure	50% subclinical
0.5	arrival.only	1	arrival	50% subclinical
0.5	both	0.933333333333333	both	50% subclinical
0.5	departure.only	0.833333333333333	departure	50% subclinical
0.5	arrival.only	0.933333333333333	arrival	50% subclinical
0.5	both	0.766666666666667	both	50% subclinical
0.5	departure.only	0.766666666666667	departure	50% subclinical
0.5	arrival.only	0.8	arrival	50% subclinical
0.5	both	0.733333333333333	both	50% subclinical
0.5	departure.only	0.9	departure	50% subclinical
0.5	arrival.only	0.766666666666667	arrival	50% subclinical
0.5	both	0.9	both	50% subclinical
0.5	departure.only	0.8	departure	50% subclinical
0.5	arrival.only	0.833333333333333	arrival	50% subclinical
0.5	both	0.733333333333333	both	50% subclinical
0.5	departure.only	0.933333333333333	departure	50% subclinical
0.5	arrival.only	0.9	arrival	50% subclinical
0.5	both	0.866666666666667	both	50% subclinical
0.5	departure.only	0.8	departure	50% subclinical
0.5	arrival.only	0.8	arrival	50% subclinical
0.5	both	0.9	both	50% subclinical
0.5	departure.only	0.866666666666667	departure	50% subclinical
0.5	arrival.only	0.9	arrival	50% subclinical
0.5	both	0.7	both	50% subclinical
0.5	departure.only	0.9	departure	50% subclinical
0.5	arrival.only	0.9	arrival	50% subclinical
0.5	both	0.833333333333333	both	50% subclinical
0.5	departure.only	0.9	departure	50% subclinical
0.5	arrival.only	0.866666666666667	arrival	50% subclinical
0.5	both	0.866666666666667	both	50% subclinical
0.5	departure.only	0.866666666666667	departure	50% subclinical
0.5	arrival.only	0.966666666666667	arrival	50% subclinical
0.5	both	0.833333333333333	both	50% subclinical
0.5	departure.only	0.8	departure	50% subclinical
0.5	arrival.only	0.9	arrival	50% subclinical
0.5	both	0.7	both	50% subclinical
0.5	departure.only	0.933333333333333	departure	50% subclinical
0.5	arrival.only	0.933333333333333	arrival	50% subclinical
0.5	both	0.833333333333333	both	50% subclinical
0.5	departure.only	0.766666666666667	departure	50% subclinical
0.5	arrival.only	0.8	arrival	50% subclinical
0.5	both	0.666666666666667	both	50% subclinical
0.5	departure.only	0.9	departure	50% subclinical
0.5	arrival.only	0.866666666666667	arrival	50% subclinical
0.5	both	0.966666666666667	both	50% subclinical
0.5	departure.only	0.966666666666667	departure	50% subclinical
0.5	arrival.only	0.766666666666667	arrival	50% subclinical
0.5	both	0.866666666666667	both	50% subclinical
0.5	departure.only	0.9	departure	50% subclinical
0.5	arrival.only	0.866666666666667	arrival	50% subclinical
0.5	both	0.9	both	50% subclinical
0.5	departure.only	0.8	departure	50% subclinical
0.5	arrival.only	0.633333333333333	arrival	50% subclinical
0.5	both	0.733333333333333	both	50% subclinical
0.5	departure.only	0.933333333333333	departure	50% subclinical
0.5	arrival.only	0.933333333333333	arrival	50% subclinical
0.5	both	0.8	both	50% subclinical
0.5	departure.only	0.8	departure	50% subclinical
0.5	arrival.only	0.733333333333333	arrival	50% subclinical
0.5	both	0.766666666666667	both	50% subclinical
0.5	departure.only	0.933333333333333	departure	50% subclinical
0.5	arrival.only	0.9	arrival	50% subclinical
0.5	both	0.933333333333333	both	50% subclinical
0.5	departure.only	0.766666666666667	departure	50% subclinical
0.5	arrival.only	0.8	arrival	50% subclinical
0.5	both	0.866666666666667	both	50% subclinical
0.5	departure.only	0.966666666666667	departure	50% subclinical
0.5	arrival.only	0.766666666666667	arrival	50% subclinical
0.5	both	0.7	both	50% subclinical
0.5	departure.only	0.933333333333333	departure	50% subclinical
0.5	arrival.only	0.9	arrival	50% subclinical
0.5	both	0.833333333333333	both	50% subclinical
0.5	departure.only	0.9	departure	50% subclinical
0.5	arrival.only	0.7	arrival	50% subclinical
0.5	both	0.9	both	50% subclinical
0.5	departure.only	0.933333333333333	departure	50% subclinical
0.5	arrival.only	0.7	arrival	50% subclinical
0.5	both	0.766666666666667	both	50% subclinical
0.5	departure.only	0.8	departure	50% subclinical
0.5	arrival.only	0.766666666666667	arrival	50% subclinical
0.5	both	0.733333333333333	both	50% subclinical
0.5	departure.only	0.866666666666667	departure	50% subclinical
0.5	arrival.only	0.966666666666667	arrival	50% subclinical
0.5	both	0.833333333333333	both	50% subclinical
0.5	departure.only	0.866666666666667	departure	50% subclinical
0.5	arrival.only	0.866666666666667	arrival	50% subclinical
0.5	both	0.8	both	50% subclinical
0.5	departure.only	0.933333333333333	departure	50% subclinical
0.5	arrival.only	0.833333333333333	arrival	50% subclinical
0.5	both	0.8	both	50% subclinical
0.5	departure.only	0.9	departure	50% subclinical
0.5	arrival.only	0.9	arrival	50% subclinical
0.5	both	0.733333333333333	both	50% subclinical
0.5	departure.only	0.866666666666667	departure	50% subclinical
0.5	arrival.only	0.866666666666667	arrival	50% subclinical
0.5	both	0.866666666666667	both	50% subclinical
0.5	departure.only	0.8	departure	50% subclinical
0.5	arrival.only	0.933333333333333	arrival	50% subclinical
0.5	both	0.866666666666667	both	50% subclinical
0.5	departure.only	0.9	departure	50% subclinical
0.5	arrival.only	0.533333333333333	arrival	50% subclinical
0.5	both	0.766666666666667	both	50% subclinical
0.5	departure.only	0.9	departure	50% subclinical
0.5	arrival.only	0.933333333333333	arrival	50% subclinical
0.5	both	0.766666666666667	both	50% subclinical
0.5	departure.only	0.866666666666667	departure	50% subclinical
0.5	arrival.only	0.7	arrival	50% subclinical
0.5	both	0.733333333333333	both	50% subclinical
0.5	departure.only	0.866666666666667	departure	50% subclinical
0.5	arrival.only	0.866666666666667	arrival	50% subclinical
0.5	both	0.9	both	50% subclinical
0.5	departure.only	0.9	departure	50% subclinical
0.5	arrival.only	0.666666666666667	arrival	50% subclinical
0.5	both	0.733333333333333	both	50% subclinical
0.5	departure.only	0.8	departure	50% subclinical
0.5	arrival.only	0.766666666666667	arrival	50% subclinical
0.5	both	0.833333333333333	both	50% subclinical
0.5	departure.only	0.933333333333333	departure	50% subclinical
0.5	arrival.only	0.9	arrival	50% subclinical
0.5	both	0.833333333333333	both	50% subclinical
0.5	departure.only	0.966666666666667	departure	50% subclinical
0.5	arrival.only	0.866666666666667	arrival	50% subclinical
0.5	both	0.9	both	50% subclinical
0.5	departure.only	0.9	departure	50% subclinical
0.5	arrival.only	0.766666666666667	arrival	50% subclinical
0.5	both	0.9	both	50% subclinical
0.5	departure.only	0.9	departure	50% subclinical
0.5	arrival.only	0.833333333333333	arrival	50% subclinical
0.5	both	0.9	both	50% subclinical
0.5	departure.only	0.933333333333333	departure	50% subclinical
0.5	arrival.only	0.833333333333333	arrival	50% subclinical
0.5	both	0.733333333333333	both	50% subclinical
0.5	departure.only	0.866666666666667	departure	50% subclinical
0.5	arrival.only	0.8	arrival	50% subclinical
0.5	both	0.833333333333333	both	50% subclinical
0.5	departure.only	0.666666666666667	departure	50% subclinical
0.5	arrival.only	0.766666666666667	arrival	50% subclinical
0.5	both	0.733333333333333	both	50% subclinical
0.5	departure.only	0.866666666666667	departure	50% subclinical
0.5	arrival.only	0.9	arrival	50% subclinical
0.5	both	0.966666666666667	both	50% subclinical
0.5	departure.only	0.766666666666667	departure	50% subclinical
0.5	arrival.only	0.9	arrival	50% subclinical
0.5	both	0.7	both	50% subclinical
0.5	departure.only	0.833333333333333	departure	50% subclinical
0.5	arrival.only	0.966666666666667	arrival	50% subclinical
0.5	both	0.733333333333333	both	50% subclinical
0.5	departure.only	0.9	departure	50% subclinical
0.5	arrival.only	0.866666666666667	arrival	50% subclinical
0.5	both	0.966666666666667	both	50% subclinical
0.5	departure.only	0.866666666666667	departure	50% subclinical
0.5	arrival.only	0.833333333333333	arrival	50% subclinical
0.5	both	0.766666666666667	both	50% subclinical
0.5	departure.only	0.833333333333333	departure	50% subclinical
0.5	arrival.only	0.8	arrival	50% subclinical
0.5	both	0.866666666666667	both	50% subclinical
0.5	departure.only	0.933333333333333	departure	50% subclinical
0.5	arrival.only	0.833333333333333	arrival	50% subclinical
0.5	both	0.833333333333333	both	50% subclinical
0.5	departure.only	0.9	departure	50% subclinical
0.5	arrival.only	0.966666666666667	arrival	50% subclinical
0.5	both	0.633333333333333	both	50% subclinical
0.5	departure.only	0.866666666666667	departure	50% subclinical
0.5	arrival.only	0.766666666666667	arrival	50% subclinical
0.5	both	0.866666666666667	both	50% subclinical
0.5	departure.only	0.866666666666667	departure	50% subclinical
0.5	arrival.only	0.9	arrival	50% subclinical
0.5	both	0.833333333333333	both	50% subclinical
0.5	departure.only	0.8	departure	50% subclinical
0.5	arrival.only	0.866666666666667	arrival	50% subclinical
0.5	both	0.866666666666667	both	50% subclinical
0.5	departure.only	0.833333333333333	departure	50% subclinical
0.5	arrival.only	0.9	arrival	50% subclinical
0.5	both	0.666666666666667	both	50% subclinical
0.5	departure.only	0.766666666666667	departure	50% subclinical
0.5	arrival.only	0.866666666666667	arrival	50% subclinical
0.5	both	0.733333333333333	both	50% subclinical
0.5	departure.only	0.866666666666667	departure	50% subclinical
0.5	arrival.only	0.8	arrival	50% subclinical
0.5	both	0.8	both	50% subclinical
0.5	departure.only	0.866666666666667	departure	50% subclinical
0.5	arrival.only	0.933333333333333	arrival	50% subclinical
0.5	both	0.833333333333333	both	50% subclinical
0.5	departure.only	0.866666666666667	departure	50% subclinical
0.5	arrival.only	0.866666666666667	arrival	50% subclinical
0.5	both	0.733333333333333	both	50% subclinical
0.5	departure.only	0.8	departure	50% subclinical
0.5	arrival.only	0.8	arrival	50% subclinical
0.5	both	0.833333333333333	both	50% subclinical
0.5	departure.only	0.866666666666667	departure	50% subclinical
0.5	arrival.only	0.766666666666667	arrival	50% subclinical
0.5	both	0.766666666666667	both	50% subclinical
0.5	departure.only	0.833333333333333	departure	50% subclinical
0.5	arrival.only	0.9	arrival	50% subclinical
0.5	both	0.8	both	50% subclinical
0.5	departure.only	0.966666666666667	departure	50% subclinical
0.5	arrival.only	0.9	arrival	50% subclinical
0.5	both	0.633333333333333	both	50% subclinical
0.5	departure.only	0.8	departure	50% subclinical
0.5	arrival.only	0.8	arrival	50% subclinical
0.5	both	0.833333333333333	both	50% subclinical
0.5	departure.only	0.933333333333333	departure	50% subclinical
0.5	arrival.only	0.966666666666667	arrival	50% subclinical
0.5	both	0.933333333333333	both	50% subclinical
0.5	departure.only	0.9	departure	50% subclinical
0.5	arrival.only	0.9	arrival	50% subclinical
0.5	both	0.9	both	50% subclinical
0.5	departure.only	0.966666666666667	departure	50% subclinical
0.5	arrival.only	0.7	arrival	50% subclinical
0.5	both	0.7	both	50% subclinical
0.5	departure.only	0.833333333333333	departure	50% subclinical
0.5	arrival.only	0.933333333333333	arrival	50% subclinical
0.5	both	0.866666666666667	both	50% subclinical
0.5	departure.only	0.733333333333333	departure	50% subclinical
0.5	arrival.only	0.833333333333333	arrival	50% subclinical
0.5	both	0.9	both	50% subclinical
0.5	departure.only	0.9	departure	50% subclinical
0.5	arrival.only	0.966666666666667	arrival	50% subclinical
0.5	both	0.9	both	50% subclinical
0.5	departure.only	0.833333333333333	departure	50% subclinical
0.5	arrival.only	0.9	arrival	50% subclinical
0.5	both	0.7	both	50% subclinical
0.5	departure.only	0.766666666666667	departure	50% subclinical
0.5	arrival.only	0.7	arrival	50% subclinical
0.5	both	0.7	both	50% subclinical
0.5	departure.only	0.933333333333333	departure	50% subclinical
0.5	arrival.only	0.833333333333333	arrival	50% subclinical
0.5	both	0.9	both	50% subclinical
0.5	departure.only	0.933333333333333	departure	50% subclinical
0.5	arrival.only	0.833333333333333	arrival	50% subclinical
0.5	both	0.9	both	50% subclinical
0.5	departure.only	0.9	departure	50% subclinical
0.5	arrival.only	0.933333333333333	arrival	50% subclinical
0.5	both	0.6	both	50% subclinical
0.5	departure.only	0.966666666666667	departure	50% subclinical
0.5	arrival.only	0.866666666666667	arrival	50% subclinical
0.5	both	0.833333333333333	both	50% subclinical
0.5	departure.only	0.866666666666667	departure	50% subclinical
0.5	arrival.only	0.866666666666667	arrival	50% subclinical
0.5	both	0.9	both	50% subclinical
0.5	departure.only	0.966666666666667	departure	50% subclinical
0.5	arrival.only	0.766666666666667	arrival	50% subclinical
0.5	both	0.933333333333333	both	50% subclinical
0.5	departure.only	0.866666666666667	departure	50% subclinical
0.5	arrival.only	0.766666666666667	arrival	50% subclinical
0.5	both	0.766666666666667	both	50% subclinical
0.5	departure.only	0.966666666666667	departure	50% subclinical
0.5	arrival.only	0.8	arrival	50% subclinical
0.5	both	0.866666666666667	both	50% subclinical
0.5	departure.only	0.9	departure	50% subclinical
0.5	arrival.only	0.833333333333333	arrival	50% subclinical
0.5	both	0.7	both	50% subclinical
0.5	departure.only	0.833333333333333	departure	50% subclinical
0.5	arrival.only	0.9	arrival	50% subclinical
0.5	both	0.733333333333333	both	50% subclinical
0.5	departure.only	0.833333333333333	departure	50% subclinical
0.5	arrival.only	0.8	arrival	50% subclinical
0.5	both	0.8	both	50% subclinical
0.5	departure.only	0.866666666666667	departure	50% subclinical
0.5	arrival.only	0.933333333333333	arrival	50% subclinical
0.5	both	0.9	both	50% subclinical
0.5	departure.only	0.8	departure	50% subclinical
0.5	arrival.only	0.866666666666667	arrival	50% subclinical
0.5	both	0.8	both	50% subclinical
0.5	departure.only	0.9	departure	50% subclinical
0.5	arrival.only	0.9	arrival	50% subclinical
0.5	both	0.866666666666667	both	50% subclinical
0.5	departure.only	0.833333333333333	departure	50% subclinical
0.5	arrival.only	0.666666666666667	arrival	50% subclinical
0.5	both	0.666666666666667	both	50% subclinical
0.5	departure.only	0.7	departure	50% subclinical
0.5	arrival.only	0.7	arrival	50% subclinical
0.5	both	0.8	both	50% subclinical
0.5	departure.only	0.933333333333333	departure	50% subclinical
0.5	arrival.only	0.9	arrival	50% subclinical
0.5	both	0.833333333333333	both	50% subclinical
0.5	departure.only	0.9	departure	50% subclinical
0.5	arrival.only	0.8	arrival	50% subclinical
0.5	both	0.833333333333333	both	50% subclinical
0.5	departure.only	0.933333333333333	departure	50% subclinical
0.5	arrival.only	0.7	arrival	50% subclinical
0.5	both	0.833333333333333	both	50% subclinical
0.5	departure.only	0.833333333333333	departure	50% subclinical
0.5	arrival.only	0.9	arrival	50% subclinical
0.5	both	0.833333333333333	both	50% subclinical
0.5	departure.only	0.933333333333333	departure	50% subclinical
0.5	arrival.only	0.9	arrival	50% subclinical
0.5	both	0.9	both	50% subclinical
0.5	departure.only	0.933333333333333	departure	50% subclinical
0.5	arrival.only	0.933333333333333	arrival	50% subclinical
0.5	both	0.9	both	50% subclinical
0.5	departure.only	0.6	departure	50% subclinical
0.5	arrival.only	0.7	arrival	50% subclinical
0.5	both	0.7	both	50% subclinical
0.5	departure.only	0.866666666666667	departure	50% subclinical
0.5	arrival.only	0.766666666666667	arrival	50% subclinical
0.5	both	0.733333333333333	both	50% subclinical
0.5	departure.only	0.933333333333333	departure	50% subclinical
0.5	arrival.only	0.733333333333333	arrival	50% subclinical
0.5	both	0.7	both	50% subclinical
0.5	departure.only	0.966666666666667	departure	50% subclinical
0.5	arrival.only	0.866666666666667	arrival	50% subclinical
0.5	both	0.566666666666667	both	50% subclinical
0.5	departure.only	0.766666666666667	departure	50% subclinical
0.5	arrival.only	0.8	arrival	50% subclinical
0.5	both	0.833333333333333	both	50% subclinical
0.5	departure.only	0.833333333333333	departure	50% subclinical
0.5	arrival.only	0.8	arrival	50% subclinical
0.5	both	0.766666666666667	both	50% subclinical
0.5	departure.only	0.866666666666667	departure	50% subclinical
0.5	arrival.only	0.866666666666667	arrival	50% subclinical
0.5	both	0.666666666666667	both	50% subclinical
0.5	departure.only	0.966666666666667	departure	50% subclinical
0.5	arrival.only	0.866666666666667	arrival	50% subclinical
0.5	both	0.866666666666667	both	50% subclinical
0.5	departure.only	0.933333333333333	departure	50% subclinical
0.5	arrival.only	0.9	arrival	50% subclinical
0.5	both	0.833333333333333	both	50% subclinical
0.5	departure.only	0.966666666666667	departure	50% subclinical
0.5	arrival.only	0.9	arrival	50% subclinical
0.5	both	0.833333333333333	both	50% subclinical
0.5	departure.only	0.833333333333333	departure	50% subclinical
0.5	arrival.only	0.733333333333333	arrival	50% subclinical
0.5	both	0.8	both	50% subclinical
0.5	departure.only	0.866666666666667	departure	50% subclinical
0.5	arrival.only	0.866666666666667	arrival	50% subclinical
0.5	both	0.833333333333333	both	50% subclinical
0.5	departure.only	0.933333333333333	departure	50% subclinical
0.5	arrival.only	0.966666666666667	arrival	50% subclinical
0.5	both	0.766666666666667	both	50% subclinical
0.5	departure.only	0.8	departure	50% subclinical
0.5	arrival.only	0.766666666666667	arrival	50% subclinical
0.5	both	0.833333333333333	both	50% subclinical
0.5	departure.only	0.9	departure	50% subclinical
0.5	arrival.only	0.9	arrival	50% subclinical
0.5	both	0.9	both	50% subclinical
0.5	departure.only	0.933333333333333	departure	50% subclinical
0.5	arrival.only	0.833333333333333	arrival	50% subclinical
0.5	both	0.866666666666667	both	50% subclinical
0.5	departure.only	0.866666666666667	departure	50% subclinical
0.5	arrival.only	0.833333333333333	arrival	50% subclinical
0.5	both	0.733333333333333	both	50% subclinical
0.5	departure.only	0.966666666666667	departure	50% subclinical
0.5	arrival.only	1	arrival	50% subclinical
0.5	both	0.966666666666667	both	50% subclinical
0.5	departure.only	0.933333333333333	departure	50% subclinical
0.5	arrival.only	0.8	arrival	50% subclinical
0.5	both	0.833333333333333	both	50% subclinical
0.5	departure.only	0.9	departure	50% subclinical
0.5	arrival.only	0.9	arrival	50% subclinical
0.5	both	0.766666666666667	both	50% subclinical
0.5	departure.only	0.8	departure	50% subclinical
0.5	arrival.only	0.766666666666667	arrival	50% subclinical
0.5	both	0.633333333333333	both	50% subclinical
0.5	departure.only	0.866666666666667	departure	50% subclinical
0.5	arrival.only	0.766666666666667	arrival	50% subclinical
0.5	both	0.7	both	50% subclinical
0.5	departure.only	0.9	departure	50% subclinical
0.5	arrival.only	0.9	arrival	50% subclinical
0.5	both	0.8	both	50% subclinical
0.5	departure.only	0.9	departure	50% subclinical
0.5	arrival.only	0.833333333333333	arrival	50% subclinical
0.5	both	0.833333333333333	both	50% subclinical
0.5	departure.only	0.9	departure	50% subclinical
0.5	arrival.only	0.7	arrival	50% subclinical
0.5	both	0.633333333333333	both	50% subclinical
0.5	departure.only	0.866666666666667	departure	50% subclinical
0.5	arrival.only	0.966666666666667	arrival	50% subclinical
0.5	both	0.733333333333333	both	50% subclinical
0.5	departure.only	0.933333333333333	departure	50% subclinical
0.5	arrival.only	0.9	arrival	50% subclinical
0.5	both	0.733333333333333	both	50% subclinical
0.5	departure.only	0.933333333333333	departure	50% subclinical
0.5	arrival.only	0.8	arrival	50% subclinical
0.5	both	0.866666666666667	both	50% subclinical
0.5	departure.only	0.9	departure	50% subclinical
0.5	arrival.only	0.866666666666667	arrival	50% subclinical
0.5	both	0.766666666666667	both	50% subclinical
0.5	departure.only	0.8	departure	50% subclinical
0.5	arrival.only	0.933333333333333	arrival	50% subclinical
0.5	both	0.833333333333333	both	50% subclinical
0.5	departure.only	0.966666666666667	departure	50% subclinical
0.5	arrival.only	0.866666666666667	arrival	50% subclinical
0.5	both	0.8	both	50% subclinical
0.5	departure.only	0.866666666666667	departure	50% subclinical
0.5	arrival.only	0.966666666666667	arrival	50% subclinical
0.5	both	1	both	50% subclinical
0.5	departure.only	0.8	departure	50% subclinical
0.5	arrival.only	0.7	arrival	50% subclinical
0.5	both	0.8	both	50% subclinical
0.5	departure.only	0.933333333333333	departure	50% subclinical
0.5	arrival.only	0.833333333333333	arrival	50% subclinical
0.5	both	0.766666666666667	both	50% subclinical
0.5	departure.only	0.866666666666667	departure	50% subclinical
0.5	arrival.only	0.7	arrival	50% subclinical
0.5	both	0.866666666666667	both	50% subclinical
0.5	departure.only	0.866666666666667	departure	50% subclinical
0.5	arrival.only	0.9	arrival	50% subclinical
0.5	both	0.8	both	50% subclinical
0.5	departure.only	0.866666666666667	departure	50% subclinical
0.5	arrival.only	0.833333333333333	arrival	50% subclinical
0.5	both	0.766666666666667	both	50% subclinical
0.5	departure.only	0.8	departure	50% subclinical
0.5	arrival.only	0.933333333333333	arrival	50% subclinical
0.5	both	0.7	both	50% subclinical
0.5	departure.only	0.866666666666667	departure	50% subclinical
0.5	arrival.only	0.9	arrival	50% subclinical
0.5	both	0.866666666666667	both	50% subclinical
0.5	departure.only	0.933333333333333	departure	50% subclinical
0.5	arrival.only	0.9	arrival	50% subclinical
0.5	both	0.933333333333333	both	50% subclinical
0.5	departure.only	0.866666666666667	departure	50% subclinical
0.5	arrival.only	0.866666666666667	arrival	50% subclinical
0.5	both	0.733333333333333	both	50% subclinical
0.5	departure.only	0.866666666666667	departure	50% subclinical
0.5	arrival.only	0.666666666666667	arrival	50% subclinical
0.5	both	0.5	both	50% subclinical
0.5	departure.only	0.833333333333333	departure	50% subclinical
0.5	arrival.only	0.866666666666667	arrival	50% subclinical
0.5	both	0.833333333333333	both	50% subclinical
0.5	departure.only	0.866666666666667	departure	50% subclinical
0.5	arrival.only	0.933333333333333	arrival	50% subclinical
0.5	both	0.766666666666667	both	50% subclinical
0.5	departure.only	0.933333333333333	departure	50% subclinical
0.5	arrival.only	0.833333333333333	arrival	50% subclinical
0.5	both	0.833333333333333	both	50% subclinical
0.5	departure.only	0.933333333333333	departure	50% subclinical
0.5	arrival.only	0.8	arrival	50% subclinical
0.5	both	0.966666666666667	both	50% subclinical
0.5	departure.only	0.933333333333333	departure	50% subclinical
0.5	arrival.only	0.766666666666667	arrival	50% subclinical
0.5	both	1	both	50% subclinical
0.5	departure.only	0.766666666666667	departure	50% subclinical
0.5	arrival.only	0.866666666666667	arrival	50% subclinical
0.5	both	0.9	both	50% subclinical
0.5	departure.only	0.933333333333333	departure	50% subclinical
0.5	arrival.only	0.866666666666667	arrival	50% subclinical
0.5	both	0.8	both	50% subclinical
0.5	departure.only	0.833333333333333	departure	50% subclinical
0.5	arrival.only	0.766666666666667	arrival	50% subclinical
0.5	both	0.733333333333333	both	50% subclinical
0.5	departure.only	0.9	departure	50% subclinical
0.5	arrival.only	0.966666666666667	arrival	50% subclinical
0.5	both	0.966666666666667	both	50% subclinical
0.5	departure.only	0.933333333333333	departure	50% subclinical
0.5	arrival.only	0.866666666666667	arrival	50% subclinical
0.5	both	0.866666666666667	both	50% subclinical
0.5	departure.only	0.866666666666667	departure	50% subclinical
0.5	arrival.only	0.933333333333333	arrival	50% subclinical
0.5	both	0.8	both	50% subclinical
0.5	departure.only	0.866666666666667	departure	50% subclinical
0.5	arrival.only	0.933333333333333	arrival	50% subclinical
0.5	both	0.666666666666667	both	50% subclinical
0.5	departure.only	0.8	departure	50% subclinical
0.5	arrival.only	0.866666666666667	arrival	50% subclinical
0.5	both	0.833333333333333	both	50% subclinical
0.5	departure.only	0.733333333333333	departure	50% subclinical
0.5	arrival.only	0.8	arrival	50% subclinical
0.5	both	0.8	both	50% subclinical
0.5	departure.only	0.866666666666667	departure	50% subclinical
0.5	arrival.only	0.8	arrival	50% subclinical
0.5	both	0.766666666666667	both	50% subclinical
0.5	departure.only	0.966666666666667	departure	50% subclinical
0.5	arrival.only	0.866666666666667	arrival	50% subclinical
0.5	both	0.766666666666667	both	50% subclinical
0.5	departure.only	0.933333333333333	departure	50% subclinical
0.5	arrival.only	0.833333333333333	arrival	50% subclinical
0.5	both	0.8	both	50% subclinical
0.5	departure.only	0.966666666666667	departure	50% subclinical
0.5	arrival.only	0.933333333333333	arrival	50% subclinical
0.5	both	0.7	both	50% subclinical
0.5	departure.only	0.7	departure	50% subclinical
0.5	arrival.only	0.833333333333333	arrival	50% subclinical
0.5	both	0.7	both	50% subclinical
0.5	departure.only	0.8	departure	50% subclinical
0.5	arrival.only	0.9	arrival	50% subclinical
0.5	both	0.933333333333333	both	50% subclinical
0.5	departure.only	0.966666666666667	departure	50% subclinical
0.5	arrival.only	0.733333333333333	arrival	50% subclinical
0.5	both	0.833333333333333	both	50% subclinical
0.5	departure.only	0.966666666666667	departure	50% subclinical
0.5	arrival.only	0.766666666666667	arrival	50% subclinical
0.5	both	0.8	both	50% subclinical
0.5	departure.only	0.9	departure	50% subclinical
0.5	arrival.only	0.9	arrival	50% subclinical
0.5	both	0.9	both	50% subclinical
0.5	departure.only	0.833333333333333	departure	50% subclinical
0.5	arrival.only	0.666666666666667	arrival	50% subclinical
0.5	both	0.8	both	50% subclinical
0.5	departure.only	0.8	departure	50% subclinical
0.5	arrival.only	0.9	arrival	50% subclinical
0.5	both	0.833333333333333	both	50% subclinical
0.5	departure.only	0.9	departure	50% subclinical
0.5	arrival.only	0.933333333333333	arrival	50% subclinical
0.5	both	0.833333333333333	both	50% subclinical
0.5	departure.only	0.766666666666667	departure	50% subclinical
0.5	arrival.only	0.666666666666667	arrival	50% subclinical
0.5	both	0.6	both	50% subclinical
0.5	departure.only	0.833333333333333	departure	50% subclinical
0.5	arrival.only	0.766666666666667	arrival	50% subclinical
0.5	both	0.833333333333333	both	50% subclinical
0.5	departure.only	0.933333333333333	departure	50% subclinical
0.5	arrival.only	0.866666666666667	arrival	50% subclinical
0.5	both	0.866666666666667	both	50% subclinical
0.5	departure.only	0.933333333333333	departure	50% subclinical
0.5	arrival.only	1	arrival	50% subclinical
0.5	both	0.933333333333333	both	50% subclinical
0.5	departure.only	0.933333333333333	departure	50% subclinical
0.5	arrival.only	0.866666666666667	arrival	50% subclinical
0.5	both	0.9	both	50% subclinical
0.5	departure.only	1	departure	50% subclinical
0.5	arrival.only	0.8	arrival	50% subclinical
0.5	both	0.633333333333333	both	50% subclinical
0.5	departure.only	0.866666666666667	departure	50% subclinical
0.5	arrival.only	0.9	arrival	50% subclinical
0.5	both	0.7	both	50% subclinical
0.5	departure.only	0.966666666666667	departure	50% subclinical
0.5	arrival.only	0.9	arrival	50% subclinical
0.5	both	0.933333333333333	both	50% subclinical
0.5	departure.only	0.8	departure	50% subclinical
0.5	arrival.only	0.7	arrival	50% subclinical
0.5	both	0.733333333333333	both	50% subclinical
0.5	departure.only	0.8	departure	50% subclinical
0.5	arrival.only	0.933333333333333	arrival	50% subclinical
0.5	both	0.8	both	50% subclinical
0.5	departure.only	0.933333333333333	departure	50% subclinical
0.5	arrival.only	0.866666666666667	arrival	50% subclinical
0.5	both	0.733333333333333	both	50% subclinical
0.5	departure.only	0.966666666666667	departure	50% subclinical
0.5	arrival.only	0.9	arrival	50% subclinical
0.5	both	0.9	both	50% subclinical
0.5	departure.only	0.833333333333333	departure	50% subclinical
0.5	arrival.only	0.933333333333333	arrival	50% subclinical
0.5	both	0.766666666666667	both	50% subclinical
0.5	departure.only	0.9	departure	50% subclinical
0.5	arrival.only	0.9	arrival	50% subclinical
0.5	both	0.9	both	50% subclinical
0.5	departure.only	0.9	departure	50% subclinical
0.5	arrival.only	0.766666666666667	arrival	50% subclinical
0.5	both	0.766666666666667	both	50% subclinical
0.5	departure.only	0.966666666666667	departure	50% subclinical
0.5	arrival.only	0.833333333333333	arrival	50% subclinical
0.5	both	0.9	both	50% subclinical
0.5	departure.only	0.966666666666667	departure	50% subclinical
0.5	arrival.only	0.733333333333333	arrival	50% subclinical
0.5	both	0.733333333333333	both	50% subclinical
0.5	departure.only	0.966666666666667	departure	50% subclinical
0.5	arrival.only	0.9	arrival	50% subclinical
0.5	both	0.833333333333333	both	50% subclinical
0.5	departure.only	0.9	departure	50% subclinical
0.5	arrival.only	0.966666666666667	arrival	50% subclinical
0.5	both	0.833333333333333	both	50% subclinical
0.5	departure.only	0.866666666666667	departure	50% subclinical
0.5	arrival.only	0.766666666666667	arrival	50% subclinical
0.5	both	0.8	both	50% subclinical
0.5	departure.only	0.966666666666667	departure	50% subclinical
0.5	arrival.only	0.766666666666667	arrival	50% subclinical
0.5	both	0.9	both	50% subclinical
0.5	departure.only	0.9	departure	50% subclinical
0.5	arrival.only	0.866666666666667	arrival	50% subclinical
0.5	both	0.8	both	50% subclinical
0.5	departure.only	0.9	departure	50% subclinical
0.5	arrival.only	0.766666666666667	arrival	50% subclinical
0.5	both	0.933333333333333	both	50% subclinical
0.5	departure.only	1	departure	50% subclinical
0.5	arrival.only	0.866666666666667	arrival	50% subclinical
0.5	both	0.766666666666667	both	50% subclinical
0.5	departure.only	0.766666666666667	departure	50% subclinical
0.5	arrival.only	0.866666666666667	arrival	50% subclinical
0.5	both	0.766666666666667	both	50% subclinical
0.5	departure.only	0.966666666666667	departure	50% subclinical
0.5	arrival.only	0.933333333333333	arrival	50% subclinical
0.5	both	0.866666666666667	both	50% subclinical
0.5	departure.only	0.933333333333333	departure	50% subclinical
0.5	arrival.only	0.933333333333333	arrival	50% subclinical
0.5	both	0.8	both	50% subclinical
0.5	departure.only	0.966666666666667	departure	50% subclinical
0.5	arrival.only	0.866666666666667	arrival	50% subclinical
0.5	both	0.933333333333333	both	50% subclinical
0.5	departure.only	0.866666666666667	departure	50% subclinical
0.5	arrival.only	0.933333333333333	arrival	50% subclinical
0.5	both	0.666666666666667	both	50% subclinical
0.5	departure.only	0.933333333333333	departure	50% subclinical
0.5	arrival.only	0.866666666666667	arrival	50% subclinical
0.5	both	0.9	both	50% subclinical
0.5	departure.only	0.866666666666667	departure	50% subclinical
0.5	arrival.only	0.733333333333333	arrival	50% subclinical
0.5	both	0.8	both	50% subclinical
0.5	departure.only	0.866666666666667	departure	50% subclinical
0.5	arrival.only	0.866666666666667	arrival	50% subclinical
0.5	both	0.8	both	50% subclinical
0.5	departure.only	0.8	departure	50% subclinical
0.5	arrival.only	0.8	arrival	50% subclinical
0.5	both	0.7	both	50% subclinical
0.5	departure.only	0.833333333333333	departure	50% subclinical
0.5	arrival.only	0.933333333333333	arrival	50% subclinical
0.5	both	0.9	both	50% subclinical
0.5	departure.only	0.866666666666667	departure	50% subclinical
0.5	arrival.only	0.8	arrival	50% subclinical
0.5	both	0.9	both	50% subclinical
0.5	departure.only	0.933333333333333	departure	50% subclinical
0.5	arrival.only	0.9	arrival	50% subclinical
0.5	both	0.9	both	50% subclinical
0.5	departure.only	0.933333333333333	departure	50% subclinical
0.5	arrival.only	0.833333333333333	arrival	50% subclinical
0.5	both	0.833333333333333	both	50% subclinical
0.5	departure.only	0.833333333333333	departure	50% subclinical
0.5	arrival.only	0.9	arrival	50% subclinical
0.5	both	0.8	both	50% subclinical
0.5	departure.only	0.866666666666667	departure	50% subclinical
0.5	arrival.only	0.9	arrival	50% subclinical
0.5	both	0.833333333333333	both	50% subclinical
0.5	departure.only	0.933333333333333	departure	50% subclinical
0.5	arrival.only	0.933333333333333	arrival	50% subclinical
0.5	both	0.866666666666667	both	50% subclinical
0.5	departure.only	0.9	departure	50% subclinical
0.5	arrival.only	1	arrival	50% subclinical
0.5	both	0.766666666666667	both	50% subclinical
0.5	departure.only	0.9	departure	50% subclinical
0.5	arrival.only	0.833333333333333	arrival	50% subclinical
0.5	both	0.733333333333333	both	50% subclinical
0.5	departure.only	0.9	departure	50% subclinical
0.5	arrival.only	0.833333333333333	arrival	50% subclinical
0.5	both	0.9	both	50% subclinical
0.5	departure.only	0.933333333333333	departure	50% subclinical
0.5	arrival.only	0.966666666666667	arrival	50% subclinical
0.5	both	0.9	both	50% subclinical
0.5	departure.only	0.866666666666667	departure	50% subclinical
0.5	arrival.only	0.833333333333333	arrival	50% subclinical
0.5	both	0.733333333333333	both	50% subclinical
0.5	departure.only	0.933333333333333	departure	50% subclinical
0.5	arrival.only	0.9	arrival	50% subclinical
0.5	both	0.766666666666667	both	50% subclinical
0.5	departure.only	0.8	departure	50% subclinical
0.5	arrival.only	0.966666666666667	arrival	50% subclinical
0.5	both	0.833333333333333	both	50% subclinical
0.5	departure.only	0.8	departure	50% subclinical
0.5	arrival.only	0.7	arrival	50% subclinical
0.5	both	0.833333333333333	both	50% subclinical
0.5	departure.only	0.933333333333333	departure	50% subclinical
0.5	arrival.only	0.9	arrival	50% subclinical
0.5	both	0.566666666666667	both	50% subclinical
0.5	departure.only	0.766666666666667	departure	50% subclinical
0.5	arrival.only	0.766666666666667	arrival	50% subclinical
0.5	both	0.8	both	50% subclinical
0.5	departure.only	0.966666666666667	departure	50% subclinical
0.5	arrival.only	0.9	arrival	50% subclinical
0.5	both	0.766666666666667	both	50% subclinical
0.5	departure.only	0.933333333333333	departure	50% subclinical
0.5	arrival.only	0.833333333333333	arrival	50% subclinical
0.5	both	0.8	both	50% subclinical
0.5	departure.only	0.833333333333333	departure	50% subclinical
0.5	arrival.only	0.7	arrival	50% subclinical
0.5	both	0.833333333333333	both	50% subclinical
0.5	departure.only	0.766666666666667	departure	50% subclinical
0.5	arrival.only	0.833333333333333	arrival	50% subclinical
0.5	both	0.8	both	50% subclinical
0.5	departure.only	0.866666666666667	departure	50% subclinical
0.5	arrival.only	0.866666666666667	arrival	50% subclinical
0.5	both	0.633333333333333	both	50% subclinical
0.5	departure.only	0.966666666666667	departure	50% subclinical
0.5	arrival.only	0.9	arrival	50% subclinical
0.5	both	0.766666666666667	both	50% subclinical
0.5	departure.only	0.8	departure	50% subclinical
0.5	arrival.only	0.9	arrival	50% subclinical
0.5	both	0.766666666666667	both	50% subclinical
0.5	departure.only	0.866666666666667	departure	50% subclinical
0.5	arrival.only	0.833333333333333	arrival	50% subclinical
0.5	both	0.7	both	50% subclinical
0.5	departure.only	0.866666666666667	departure	50% subclinical
0.5	arrival.only	0.933333333333333	arrival	50% subclinical
0.5	both	0.733333333333333	both	50% subclinical
0.5	departure.only	0.933333333333333	departure	50% subclinical
0.5	arrival.only	0.866666666666667	arrival	50% subclinical
0.5	both	0.966666666666667	both	50% subclinical
0.5	departure.only	0.733333333333333	departure	50% subclinical
0.5	arrival.only	0.7	arrival	50% subclinical
0.5	both	0.633333333333333	both	50% subclinical
0.5	departure.only	0.833333333333333	departure	50% subclinical
0.5	arrival.only	0.733333333333333	arrival	50% subclinical
0.5	both	0.8	both	50% subclinical
0.5	departure.only	0.833333333333333	departure	50% subclinical
0.5	arrival.only	0.8	arrival	50% subclinical
0.5	both	0.766666666666667	both	50% subclinical
0.5	departure.only	0.866666666666667	departure	50% subclinical
0.5	arrival.only	0.866666666666667	arrival	50% subclinical
0.5	both	0.833333333333333	both	50% subclinical
0.5	departure.only	0.9	departure	50% subclinical
0.5	arrival.only	0.9	arrival	50% subclinical
0.5	both	0.833333333333333	both	50% subclinical
0.5	departure.only	0.866666666666667	departure	50% subclinical
0.5	arrival.only	0.866666666666667	arrival	50% subclinical
0.5	both	0.833333333333333	both	50% subclinical
0.5	departure.only	0.9	departure	50% subclinical
0.5	arrival.only	0.866666666666667	arrival	50% subclinical
0.5	both	0.7	both	50% subclinical
0.5	departure.only	0.933333333333333	departure	50% subclinical
0.5	arrival.only	0.9	arrival	50% subclinical
0.5	both	0.933333333333333	both	50% subclinical
0.5	departure.only	1	departure	50% subclinical
0.5	arrival.only	0.766666666666667	arrival	50% subclinical
0.5	both	0.666666666666667	both	50% subclinical
0.5	departure.only	0.9	departure	50% subclinical
0.5	arrival.only	0.766666666666667	arrival	50% subclinical
0.5	both	0.8	both	50% subclinical
0.5	departure.only	0.9	departure	50% subclinical
0.5	arrival.only	0.7	arrival	50% subclinical
0.5	both	0.866666666666667	both	50% subclinical
0.5	departure.only	0.9	departure	50% subclinical
0.5	arrival.only	0.933333333333333	arrival	50% subclinical
0.5	both	0.766666666666667	both	50% subclinical
0.5	departure.only	0.866666666666667	departure	50% subclinical
0.5	arrival.only	0.8	arrival	50% subclinical
0.5	both	0.866666666666667	both	50% subclinical
0.5	departure.only	0.9	departure	50% subclinical
0.5	arrival.only	0.866666666666667	arrival	50% subclinical
0.5	both	0.8	both	50% subclinical
0.5	departure.only	0.833333333333333	departure	50% subclinical
0.5	arrival.only	0.933333333333333	arrival	50% subclinical
0.5	both	0.9	both	50% subclinical
0.5	departure.only	1	departure	50% subclinical
0.5	arrival.only	0.966666666666667	arrival	50% subclinical
0.5	both	0.9	both	50% subclinical
0.5	departure.only	0.966666666666667	departure	50% subclinical
0.5	arrival.only	0.866666666666667	arrival	50% subclinical
0.5	both	0.866666666666667	both	50% subclinical
0.5	departure.only	1	departure	50% subclinical
0.5	arrival.only	0.9	arrival	50% subclinical
0.5	both	0.8	both	50% subclinical
0.5	departure.only	0.966666666666667	departure	50% subclinical
0.5	arrival.only	0.8	arrival	50% subclinical
0.5	both	0.733333333333333	both	50% subclinical
0.5	departure.only	0.9	departure	50% subclinical
0.5	arrival.only	0.833333333333333	arrival	50% subclinical
0.5	both	0.6	both	50% subclinical
0.5	departure.only	0.766666666666667	departure	50% subclinical
0.5	arrival.only	0.7	arrival	50% subclinical
0.5	both	0.9	both	50% subclinical
0.5	departure.only	0.933333333333333	departure	50% subclinical
0.5	arrival.only	0.866666666666667	arrival	50% subclinical
0.5	both	0.833333333333333	both	50% subclinical
0.5	departure.only	0.966666666666667	departure	50% subclinical
0.5	arrival.only	0.933333333333333	arrival	50% subclinical
0.5	both	0.866666666666667	both	50% subclinical
0.5	departure.only	1	departure	50% subclinical
0.5	arrival.only	1	arrival	50% subclinical
0.5	both	0.933333333333333	both	50% subclinical
0.5	departure.only	0.8	departure	50% subclinical
0.5	arrival.only	0.833333333333333	arrival	50% subclinical
0.5	both	0.666666666666667	both	50% subclinical
0.5	departure.only	0.833333333333333	departure	50% subclinical
0.5	arrival.only	0.566666666666667	arrival	50% subclinical
0.5	both	0.7	both	50% subclinical
0.5	departure.only	0.8	departure	50% subclinical
0.5	arrival.only	0.9	arrival	50% subclinical
0.5	both	0.833333333333333	both	50% subclinical
0.5	departure.only	0.9	departure	50% subclinical
0.5	arrival.only	0.766666666666667	arrival	50% subclinical
0.5	both	0.733333333333333	both	50% subclinical
0.5	departure.only	0.9	departure	50% subclinical
0.5	arrival.only	0.666666666666667	arrival	50% subclinical
0.5	both	0.8	both	50% subclinical
0.5	departure.only	0.833333333333333	departure	50% subclinical
0.5	arrival.only	0.766666666666667	arrival	50% subclinical
0.5	both	0.866666666666667	both	50% subclinical
0.5	departure.only	0.966666666666667	departure	50% subclinical
0.5	arrival.only	0.7	arrival	50% subclinical
0.5	both	0.8	both	50% subclinical
0.5	departure.only	0.766666666666667	departure	50% subclinical
0.5	arrival.only	0.866666666666667	arrival	50% subclinical
0.5	both	0.666666666666667	both	50% subclinical
0.5	departure.only	0.9	departure	50% subclinical
0.5	arrival.only	0.766666666666667	arrival	50% subclinical
0.5	both	0.833333333333333	both	50% subclinical
0.5	departure.only	0.9	departure	50% subclinical
0.5	arrival.only	0.933333333333333	arrival	50% subclinical
0.5	both	0.766666666666667	both	50% subclinical
0.5	departure.only	0.866666666666667	departure	50% subclinical
0.5	arrival.only	0.9	arrival	50% subclinical
0.5	both	0.8	both	50% subclinical
0.5	departure.only	0.866666666666667	departure	50% subclinical
0.5	arrival.only	0.9	arrival	50% subclinical
0.5	both	0.833333333333333	both	50% subclinical
0.5	departure.only	0.933333333333333	departure	50% subclinical
0.5	arrival.only	0.933333333333333	arrival	50% subclinical
0.5	both	0.733333333333333	both	50% subclinical
0.5	departure.only	0.9	departure	50% subclinical
0.5	arrival.only	0.833333333333333	arrival	50% subclinical
0.5	both	0.733333333333333	both	50% subclinical
0.5	departure.only	0.966666666666667	departure	50% subclinical
0.5	arrival.only	0.966666666666667	arrival	50% subclinical
0.5	both	0.866666666666667	both	50% subclinical
0.5	departure.only	0.966666666666667	departure	50% subclinical
0.5	arrival.only	0.933333333333333	arrival	50% subclinical
0.5	both	0.933333333333333	both	50% subclinical
0.5	departure.only	0.9	departure	50% subclinical
0.5	arrival.only	0.9	arrival	50% subclinical
0.5	both	0.666666666666667	both	50% subclinical
0.5	departure.only	1	departure	50% subclinical
0.5	arrival.only	0.9	arrival	50% subclinical
0.5	both	0.933333333333333	both	50% subclinical
0.5	departure.only	0.833333333333333	departure	50% subclinical
0.5	arrival.only	0.833333333333333	arrival	50% subclinical
0.5	both	0.866666666666667	both	50% subclinical
0.5	departure.only	0.933333333333333	departure	50% subclinical
0.5	arrival.only	0.866666666666667	arrival	50% subclinical
0.5	both	0.8	both	50% subclinical
0.5	departure.only	0.9	departure	50% subclinical
0.5	arrival.only	0.733333333333333	arrival	50% subclinical
0.5	both	0.666666666666667	both	50% subclinical
0.5	departure.only	0.8	departure	50% subclinical
0.5	arrival.only	0.8	arrival	50% subclinical
0.5	both	0.9	both	50% subclinical
0.5	departure.only	0.866666666666667	departure	50% subclinical
0.5	arrival.only	0.833333333333333	arrival	50% subclinical
0.5	both	0.9	both	50% subclinical
0.5	departure.only	0.866666666666667	departure	50% subclinical
0.5	arrival.only	0.933333333333333	arrival	50% subclinical
0.5	both	0.766666666666667	both	50% subclinical
0.5	departure.only	0.933333333333333	departure	50% subclinical
0.5	arrival.only	0.666666666666667	arrival	50% subclinical
0.5	both	0.833333333333333	both	50% subclinical
0.5	departure.only	0.766666666666667	departure	50% subclinical
0.5	arrival.only	0.833333333333333	arrival	50% subclinical
0.5	both	0.733333333333333	both	50% subclinical
0.5	departure.only	0.866666666666667	departure	50% subclinical
0.5	arrival.only	0.766666666666667	arrival	50% subclinical
0.5	both	0.733333333333333	both	50% subclinical
0.5	departure.only	0.833333333333333	departure	50% subclinical
0.5	arrival.only	0.766666666666667	arrival	50% subclinical
0.5	both	0.733333333333333	both	50% subclinical
0.5	departure.only	0.9	departure	50% subclinical
0.5	arrival.only	0.9	arrival	50% subclinical
0.5	both	0.733333333333333	both	50% subclinical
0.5	departure.only	0.933333333333333	departure	50% subclinical
0.5	arrival.only	0.866666666666667	arrival	50% subclinical
0.5	both	0.866666666666667	both	50% subclinical
0.5	departure.only	0.9	departure	50% subclinical
0.5	arrival.only	0.9	arrival	50% subclinical
0.5	both	0.7	both	50% subclinical
0.5	departure.only	0.833333333333333	departure	50% subclinical
0.5	arrival.only	0.833333333333333	arrival	50% subclinical
0.5	both	0.833333333333333	both	50% subclinical
0.5	departure.only	1	departure	50% subclinical
0.5	arrival.only	0.933333333333333	arrival	50% subclinical
0.5	both	0.866666666666667	both	50% subclinical
0.5	departure.only	0.833333333333333	departure	50% subclinical
0.5	arrival.only	0.833333333333333	arrival	50% subclinical
0.5	both	0.733333333333333	both	50% subclinical
0.5	departure.only	0.9	departure	50% subclinical
0.5	arrival.only	0.8	arrival	50% subclinical
0.5	both	0.8	both	50% subclinical
0.5	departure.only	0.933333333333333	departure	50% subclinical
0.5	arrival.only	0.9	arrival	50% subclinical
0.5	both	0.933333333333333	both	50% subclinical
0.5	departure.only	0.833333333333333	departure	50% subclinical
0.5	arrival.only	0.766666666666667	arrival	50% subclinical
0.5	both	0.833333333333333	both	50% subclinical
0.5	departure.only	0.833333333333333	departure	50% subclinical
0.5	arrival.only	0.9	arrival	50% subclinical
0.5	both	0.866666666666667	both	50% subclinical
0.5	departure.only	0.9	departure	50% subclinical
0.5	arrival.only	0.966666666666667	arrival	50% subclinical
0.5	both	0.933333333333333	both	50% subclinical
0.5	departure.only	0.966666666666667	departure	50% subclinical
0.5	arrival.only	0.933333333333333	arrival	50% subclinical
0.5	both	0.833333333333333	both	50% subclinical
0.5	departure.only	0.833333333333333	departure	50% subclinical
0.5	arrival.only	0.633333333333333	arrival	50% subclinical
0.5	both	0.833333333333333	both	50% subclinical
0.5	departure.only	0.9	departure	50% subclinical
0.5	arrival.only	0.766666666666667	arrival	50% subclinical
0.5	both	0.8	both	50% subclinical
0.5	departure.only	0.933333333333333	departure	50% subclinical
0.5	arrival.only	0.766666666666667	arrival	50% subclinical
0.5	both	0.833333333333333	both	50% subclinical
0.5	departure.only	0.833333333333333	departure	50% subclinical
0.5	arrival.only	0.933333333333333	arrival	50% subclinical
0.5	both	0.866666666666667	both	50% subclinical
0.5	departure.only	0.933333333333333	departure	50% subclinical
0.5	arrival.only	0.933333333333333	arrival	50% subclinical
0.5	both	0.766666666666667	both	50% subclinical
0.5	departure.only	1	departure	50% subclinical
0.5	arrival.only	0.966666666666667	arrival	50% subclinical
0.5	both	0.766666666666667	both	50% subclinical
0.5	departure.only	0.766666666666667	departure	50% subclinical
0.5	arrival.only	0.8	arrival	50% subclinical
0.5	both	0.766666666666667	both	50% subclinical
0.5	departure.only	0.833333333333333	departure	50% subclinical
0.5	arrival.only	0.766666666666667	arrival	50% subclinical
0.5	both	0.766666666666667	both	50% subclinical
0.5	departure.only	0.833333333333333	departure	50% subclinical
0.5	arrival.only	0.9	arrival	50% subclinical
0.5	both	0.733333333333333	both	50% subclinical
0.5	departure.only	0.9	departure	50% subclinical
0.5	arrival.only	0.833333333333333	arrival	50% subclinical
0.5	both	0.7	both	50% subclinical
0.5	departure.only	0.9	departure	50% subclinical
0.5	arrival.only	1	arrival	50% subclinical
0.5	both	0.9	both	50% subclinical
0.5	departure.only	0.966666666666667	departure	50% subclinical
0.5	arrival.only	0.766666666666667	arrival	50% subclinical
0.5	both	0.933333333333333	both	50% subclinical
0.5	departure.only	0.966666666666667	departure	50% subclinical
0.5	arrival.only	0.866666666666667	arrival	50% subclinical
0.5	both	0.933333333333333	both	50% subclinical
0.5	departure.only	0.9	departure	50% subclinical
0.5	arrival.only	0.866666666666667	arrival	50% subclinical
0.5	both	0.8	both	50% subclinical
0.5	departure.only	0.933333333333333	departure	50% subclinical
0.5	arrival.only	0.866666666666667	arrival	50% subclinical
0.5	both	0.766666666666667	both	50% subclinical
0.5	departure.only	0.933333333333333	departure	50% subclinical
0.5	arrival.only	0.766666666666667	arrival	50% subclinical
0.5	both	0.933333333333333	both	50% subclinical
0.5	departure.only	0.733333333333333	departure	50% subclinical
0.5	arrival.only	0.8	arrival	50% subclinical
0.5	both	0.8	both	50% subclinical
0.5	departure.only	0.9	departure	50% subclinical
0.5	arrival.only	0.933333333333333	arrival	50% subclinical
0.5	both	0.733333333333333	both	50% subclinical
0.5	departure.only	0.966666666666667	departure	50% subclinical
0.5	arrival.only	0.966666666666667	arrival	50% subclinical
0.5	both	0.866666666666667	both	50% subclinical
0.5	departure.only	0.9	departure	50% subclinical
0.5	arrival.only	0.866666666666667	arrival	50% subclinical
0.5	both	0.8	both	50% subclinical
0.5	departure.only	0.7	departure	50% subclinical
0.5	arrival.only	0.8	arrival	50% subclinical
0.5	both	0.666666666666667	both	50% subclinical
0.5	departure.only	0.9	departure	50% subclinical
0.5	arrival.only	0.9	arrival	50% subclinical
0.5	both	0.833333333333333	both	50% subclinical
0.5	departure.only	0.833333333333333	departure	50% subclinical
0.5	arrival.only	0.833333333333333	arrival	50% subclinical
0.5	both	0.7	both	50% subclinical
0.5	departure.only	0.933333333333333	departure	50% subclinical
0.5	arrival.only	0.833333333333333	arrival	50% subclinical
0.5	both	0.8	both	50% subclinical
0.5	departure.only	0.866666666666667	departure	50% subclinical
0.5	arrival.only	0.966666666666667	arrival	50% subclinical
0.5	both	0.833333333333333	both	50% subclinical
0.5	departure.only	0.833333333333333	departure	50% subclinical
0.5	arrival.only	0.8	arrival	50% subclinical
0.5	both	0.766666666666667	both	50% subclinical
0.5	departure.only	0.833333333333333	departure	50% subclinical
0.5	arrival.only	0.766666666666667	arrival	50% subclinical
0.5	both	0.666666666666667	both	50% subclinical
0.5	departure.only	1	departure	50% subclinical
0.5	arrival.only	0.866666666666667	arrival	50% subclinical
0.5	both	0.8	both	50% subclinical
0.5	departure.only	0.9	departure	50% subclinical
0.5	arrival.only	0.866666666666667	arrival	50% subclinical
0.5	both	0.833333333333333	both	50% subclinical
0.5	departure.only	0.833333333333333	departure	50% subclinical
0.5	arrival.only	0.833333333333333	arrival	50% subclinical
0.5	both	0.766666666666667	both	50% subclinical
0.5	departure.only	0.9	departure	50% subclinical
0.5	arrival.only	0.866666666666667	arrival	50% subclinical
0.5	both	0.833333333333333	both	50% subclinical
0.5	departure.only	0.933333333333333	departure	50% subclinical
0.5	arrival.only	0.933333333333333	arrival	50% subclinical
0.5	both	0.933333333333333	both	50% subclinical
0.5	departure.only	0.833333333333333	departure	50% subclinical
0.5	arrival.only	0.833333333333333	arrival	50% subclinical
0.5	both	0.7	both	50% subclinical
0.5	departure.only	0.8	departure	50% subclinical
0.5	arrival.only	0.766666666666667	arrival	50% subclinical
0.5	both	0.666666666666667	both	50% subclinical
0.5	departure.only	0.866666666666667	departure	50% subclinical
0.5	arrival.only	0.866666666666667	arrival	50% subclinical
0.5	both	0.9	both	50% subclinical
0.5	departure.only	0.866666666666667	departure	50% subclinical
0.5	arrival.only	0.666666666666667	arrival	50% subclinical
0.5	both	0.7	both	50% subclinical
0.5	departure.only	0.866666666666667	departure	50% subclinical
0.5	arrival.only	0.866666666666667	arrival	50% subclinical
0.5	both	0.866666666666667	both	50% subclinical
0.5	departure.only	0.9	departure	50% subclinical
0.5	arrival.only	1	arrival	50% subclinical
0.5	both	0.766666666666667	both	50% subclinical
0.5	departure.only	0.766666666666667	departure	50% subclinical
0.5	arrival.only	0.8	arrival	50% subclinical
0.5	both	0.8	both	50% subclinical
0.5	departure.only	0.866666666666667	departure	50% subclinical
0.5	arrival.only	0.866666666666667	arrival	50% subclinical
0.5	both	0.8	both	50% subclinical
0.5	departure.only	0.833333333333333	departure	50% subclinical
0.5	arrival.only	0.8	arrival	50% subclinical
0.5	both	0.766666666666667	both	50% subclinical
0.5	departure.only	0.833333333333333	departure	50% subclinical
0.5	arrival.only	0.866666666666667	arrival	50% subclinical
0.5	both	0.766666666666667	both	50% subclinical
0.5	departure.only	0.933333333333333	departure	50% subclinical
0.5	arrival.only	0.866666666666667	arrival	50% subclinical
0.5	both	0.866666666666667	both	50% subclinical
0.5	departure.only	0.933333333333333	departure	50% subclinical
0.5	arrival.only	0.966666666666667	arrival	50% subclinical
0.5	both	0.7	both	50% subclinical
0.5	departure.only	0.866666666666667	departure	50% subclinical
0.5	arrival.only	0.8	arrival	50% subclinical
0.5	both	0.8	both	50% subclinical
0.5	departure.only	0.833333333333333	departure	50% subclinical
0.5	arrival.only	1	arrival	50% subclinical
0.5	both	0.633333333333333	both	50% subclinical
0.5	departure.only	0.866666666666667	departure	50% subclinical
0.5	arrival.only	0.866666666666667	arrival	50% subclinical
0.5	both	0.833333333333333	both	50% subclinical
0.5	departure.only	0.966666666666667	departure	50% subclinical
0.5	arrival.only	0.966666666666667	arrival	50% subclinical
0.5	both	0.866666666666667	both	50% subclinical
0.5	departure.only	0.9	departure	50% subclinical
0.5	arrival.only	0.833333333333333	arrival	50% subclinical
0.5	both	0.633333333333333	both	50% subclinical
0.5	departure.only	0.833333333333333	departure	50% subclinical
0.5	arrival.only	0.8	arrival	50% subclinical
0.5	both	0.833333333333333	both	50% subclinical
0.5	departure.only	0.833333333333333	departure	50% subclinical
0.5	arrival.only	0.866666666666667	arrival	50% subclinical
0.5	both	0.8	both	50% subclinical
0.5	departure.only	0.9	departure	50% subclinical
0.5	arrival.only	0.733333333333333	arrival	50% subclinical
0.5	both	0.9	both	50% subclinical
0.5	departure.only	0.833333333333333	departure	50% subclinical
0.5	arrival.only	0.833333333333333	arrival	50% subclinical
0.5	both	0.766666666666667	both	50% subclinical
0.5	departure.only	0.766666666666667	departure	50% subclinical
0.5	arrival.only	0.8	arrival	50% subclinical
0.5	both	0.666666666666667	both	50% subclinical
0.5	departure.only	0.933333333333333	departure	50% subclinical
0.5	arrival.only	0.8	arrival	50% subclinical
0.5	both	0.766666666666667	both	50% subclinical
0.5	departure.only	0.933333333333333	departure	50% subclinical
0.5	arrival.only	0.933333333333333	arrival	50% subclinical
0.5	both	0.833333333333333	both	50% subclinical
0.5	departure.only	0.7	departure	50% subclinical
0.5	arrival.only	0.733333333333333	arrival	50% subclinical
0.5	both	0.733333333333333	both	50% subclinical
0.5	departure.only	0.966666666666667	departure	50% subclinical
0.5	arrival.only	0.733333333333333	arrival	50% subclinical
0.5	both	0.733333333333333	both	50% subclinical
0.5	departure.only	0.733333333333333	departure	50% subclinical
0.5	arrival.only	0.833333333333333	arrival	50% subclinical
0.5	both	0.9	both	50% subclinical
0.5	departure.only	0.866666666666667	departure	50% subclinical
0.5	arrival.only	0.8	arrival	50% subclinical
0.5	both	0.866666666666667	both	50% subclinical
0.5	departure.only	0.9	departure	50% subclinical
0.5	arrival.only	0.733333333333333	arrival	50% subclinical
0.5	both	0.833333333333333	both	50% subclinical
0.5	departure.only	0.9	departure	50% subclinical
0.5	arrival.only	0.833333333333333	arrival	50% subclinical
0.5	both	0.666666666666667	both	50% subclinical
0.5	departure.only	0.9	departure	50% subclinical
0.5	arrival.only	0.833333333333333	arrival	50% subclinical
0.5	both	0.666666666666667	both	50% subclinical
0.5	departure.only	0.933333333333333	departure	50% subclinical
0.5	arrival.only	0.866666666666667	arrival	50% subclinical
0.5	both	0.966666666666667	both	50% subclinical
0.5	departure.only	0.966666666666667	departure	50% subclinical
0.5	arrival.only	0.9	arrival	50% subclinical
0.5	both	0.9	both	50% subclinical
0.5	departure.only	0.9	departure	50% subclinical
0.5	arrival.only	0.9	arrival	50% subclinical
0.5	both	0.833333333333333	both	50% subclinical
0.5	departure.only	0.866666666666667	departure	50% subclinical
0.5	arrival.only	0.766666666666667	arrival	50% subclinical
0.5	both	0.9	both	50% subclinical
0.5	departure.only	0.933333333333333	departure	50% subclinical
0.5	arrival.only	0.8	arrival	50% subclinical
0.5	both	0.8	both	50% subclinical
0.5	departure.only	0.933333333333333	departure	50% subclinical
0.5	arrival.only	0.8	arrival	50% subclinical
0.5	both	0.733333333333333	both	50% subclinical
0.5	departure.only	0.833333333333333	departure	50% subclinical
0.5	arrival.only	0.633333333333333	arrival	50% subclinical
0.5	both	0.633333333333333	both	50% subclinical
0.5	departure.only	0.9	departure	50% subclinical
0.5	arrival.only	0.866666666666667	arrival	50% subclinical
0.5	both	0.933333333333333	both	50% subclinical
0.5	departure.only	0.966666666666667	departure	50% subclinical
0.5	arrival.only	0.9	arrival	50% subclinical
0.5	both	0.966666666666667	both	50% subclinical
0.5	departure.only	0.9	departure	50% subclinical
0.5	arrival.only	0.9	arrival	50% subclinical
0.5	both	0.733333333333333	both	50% subclinical
0.5	departure.only	0.866666666666667	departure	50% subclinical
0.5	arrival.only	0.9	arrival	50% subclinical
0.5	both	0.833333333333333	both	50% subclinical
0.5	departure.only	0.9	departure	50% subclinical
0.5	arrival.only	0.833333333333333	arrival	50% subclinical
0.5	both	0.866666666666667	both	50% subclinical
0.5	departure.only	0.866666666666667	departure	50% subclinical
0.5	arrival.only	0.766666666666667	arrival	50% subclinical
0.5	both	0.733333333333333	both	50% subclinical
0.5	departure.only	0.866666666666667	departure	50% subclinical
0.5	arrival.only	0.733333333333333	arrival	50% subclinical
0.5	both	0.666666666666667	both	50% subclinical
0.5	departure.only	0.9	departure	50% subclinical
0.5	arrival.only	0.866666666666667	arrival	50% subclinical
0.5	both	0.8	both	50% subclinical
0.5	departure.only	0.966666666666667	departure	50% subclinical
0.5	arrival.only	0.833333333333333	arrival	50% subclinical
0.5	both	0.7	both	50% subclinical
0.5	departure.only	0.966666666666667	departure	50% subclinical
0.5	arrival.only	0.9	arrival	50% subclinical
0.5	both	0.8	both	50% subclinical
0.5	departure.only	0.8	departure	50% subclinical
0.5	arrival.only	0.833333333333333	arrival	50% subclinical
0.5	both	0.866666666666667	both	50% subclinical
0.5	departure.only	0.866666666666667	departure	50% subclinical
0.5	arrival.only	0.9	arrival	50% subclinical
0.5	both	0.8	both	50% subclinical
0.5	departure.only	1	departure	50% subclinical
0.5	arrival.only	0.866666666666667	arrival	50% subclinical
0.5	both	0.866666666666667	both	50% subclinical
0.5	departure.only	0.9	departure	50% subclinical
0.5	arrival.only	0.833333333333333	arrival	50% subclinical
0.5	both	0.8	both	50% subclinical
0.5	departure.only	0.833333333333333	departure	50% subclinical
0.5	arrival.only	0.9	arrival	50% subclinical
0.5	both	0.866666666666667	both	50% subclinical
0.5	departure.only	0.9	departure	50% subclinical
0.5	arrival.only	0.8	arrival	50% subclinical
0.5	both	0.9	both	50% subclinical
0.5	departure.only	0.8	departure	50% subclinical
0.5	arrival.only	0.833333333333333	arrival	50% subclinical
0.5	both	0.633333333333333	both	50% subclinical
0.5	departure.only	0.833333333333333	departure	50% subclinical
0.5	arrival.only	0.933333333333333	arrival	50% subclinical
0.5	both	0.766666666666667	both	50% subclinical
0.5	departure.only	0.8	departure	50% subclinical
0.5	arrival.only	0.766666666666667	arrival	50% subclinical
0.5	both	0.7	both	50% subclinical
0.5	departure.only	1	departure	50% subclinical
0.5	arrival.only	0.933333333333333	arrival	50% subclinical
0.5	both	0.9	both	50% subclinical
0.5	departure.only	0.866666666666667	departure	50% subclinical
0.5	arrival.only	0.733333333333333	arrival	50% subclinical
0.5	both	0.766666666666667	both	50% subclinical
0.5	departure.only	0.966666666666667	departure	50% subclinical
0.5	arrival.only	0.9	arrival	50% subclinical
0.5	both	0.933333333333333	both	50% subclinical
0.5	departure.only	0.833333333333333	departure	50% subclinical
0.5	arrival.only	0.9	arrival	50% subclinical
0.5	both	0.766666666666667	both	50% subclinical
0.5	departure.only	0.833333333333333	departure	50% subclinical
0.5	arrival.only	0.833333333333333	arrival	50% subclinical
0.5	both	0.766666666666667	both	50% subclinical
0.5	departure.only	0.9	departure	50% subclinical
0.5	arrival.only	0.833333333333333	arrival	50% subclinical
0.5	both	0.833333333333333	both	50% subclinical
0.5	departure.only	0.9	departure	50% subclinical
0.5	arrival.only	0.866666666666667	arrival	50% subclinical
0.5	both	0.866666666666667	both	50% subclinical
0.5	departure.only	0.866666666666667	departure	50% subclinical
0.5	arrival.only	0.733333333333333	arrival	50% subclinical
0.5	both	0.833333333333333	both	50% subclinical
0.5	departure.only	0.866666666666667	departure	50% subclinical
0.5	arrival.only	0.8	arrival	50% subclinical
0.5	both	0.633333333333333	both	50% subclinical
0.5	departure.only	0.866666666666667	departure	50% subclinical
0.5	arrival.only	0.866666666666667	arrival	50% subclinical
0.5	both	0.9	both	50% subclinical
0.5	departure.only	0.7	departure	50% subclinical
0.5	arrival.only	0.8	arrival	50% subclinical
0.5	both	0.866666666666667	both	50% subclinical
0.5	departure.only	0.9	departure	50% subclinical
0.5	arrival.only	0.9	arrival	50% subclinical
0.5	both	0.833333333333333	both	50% subclinical
0.5	departure.only	0.766666666666667	departure	50% subclinical
0.5	arrival.only	0.833333333333333	arrival	50% subclinical
0.5	both	0.933333333333333	both	50% subclinical
0.5	departure.only	0.866666666666667	departure	50% subclinical
0.5	arrival.only	0.733333333333333	arrival	50% subclinical
0.5	both	0.833333333333333	both	50% subclinical
0.5	departure.only	0.933333333333333	departure	50% subclinical
0.5	arrival.only	0.966666666666667	arrival	50% subclinical
0.5	both	0.9	both	50% subclinical
0.5	departure.only	0.9	departure	50% subclinical
0.5	arrival.only	0.9	arrival	50% subclinical
0.5	both	0.866666666666667	both	50% subclinical
0.5	departure.only	0.9	departure	50% subclinical
0.5	arrival.only	0.8	arrival	50% subclinical
0.5	both	0.8	both	50% subclinical
0.5	departure.only	0.8	departure	50% subclinical
0.5	arrival.only	0.766666666666667	arrival	50% subclinical
0.5	both	0.833333333333333	both	50% subclinical
0.5	departure.only	0.9	departure	50% subclinical
0.5	arrival.only	0.833333333333333	arrival	50% subclinical
0.5	both	0.766666666666667	both	50% subclinical
0.5	departure.only	0.8	departure	50% subclinical
0.5	arrival.only	0.866666666666667	arrival	50% subclinical
0.5	both	0.8	both	50% subclinical
0.5	departure.only	0.9	departure	50% subclinical
0.5	arrival.only	0.8	arrival	50% subclinical
0.5	both	0.866666666666667	both	50% subclinical
0.5	departure.only	0.833333333333333	departure	50% subclinical
0.5	arrival.only	0.933333333333333	arrival	50% subclinical
0.5	both	0.833333333333333	both	50% subclinical
0.5	departure.only	0.933333333333333	departure	50% subclinical
0.5	arrival.only	0.9	arrival	50% subclinical
0.5	both	0.833333333333333	both	50% subclinical
0.5	departure.only	0.933333333333333	departure	50% subclinical
0.5	arrival.only	0.9	arrival	50% subclinical
0.5	both	0.833333333333333	both	50% subclinical
0.5	departure.only	0.8	departure	50% subclinical
0.5	arrival.only	0.9	arrival	50% subclinical
0.5	both	0.633333333333333	both	50% subclinical
0.5	departure.only	0.833333333333333	departure	50% subclinical
0.5	arrival.only	0.766666666666667	arrival	50% subclinical
0.5	both	0.9	both	50% subclinical
0.5	departure.only	0.9	departure	50% subclinical
0.5	arrival.only	0.966666666666667	arrival	50% subclinical
0.5	both	0.8	both	50% subclinical
0.5	departure.only	0.866666666666667	departure	50% subclinical
0.5	arrival.only	0.833333333333333	arrival	50% subclinical
0.5	both	0.566666666666667	both	50% subclinical
0.5	departure.only	0.933333333333333	departure	50% subclinical
0.5	arrival.only	0.833333333333333	arrival	50% subclinical
0.5	both	0.8	both	50% subclinical
0.5	departure.only	0.8	departure	50% subclinical
0.5	arrival.only	0.733333333333333	arrival	50% subclinical
0.5	both	0.733333333333333	both	50% subclinical
0.5	departure.only	0.9	departure	50% subclinical
0.5	arrival.only	0.966666666666667	arrival	50% subclinical
0.5	both	0.9	both	50% subclinical
0.5	departure.only	0.8	departure	50% subclinical
0.5	arrival.only	0.766666666666667	arrival	50% subclinical
0.5	both	0.833333333333333	both	50% subclinical
0.5	departure.only	0.8	departure	50% subclinical
0.5	arrival.only	0.8	arrival	50% subclinical
0.5	both	0.766666666666667	both	50% subclinical
0.5	departure.only	0.933333333333333	departure	50% subclinical
0.5	arrival.only	0.9	arrival	50% subclinical
0.5	both	0.8	both	50% subclinical
0.5	departure.only	0.866666666666667	departure	50% subclinical
0.5	arrival.only	0.9	arrival	50% subclinical
0.5	both	0.733333333333333	both	50% subclinical
0.5	departure.only	0.966666666666667	departure	50% subclinical
0.5	arrival.only	0.966666666666667	arrival	50% subclinical
0.5	both	0.8	both	50% subclinical
0.5	departure.only	0.933333333333333	departure	50% subclinical
0.5	arrival.only	0.966666666666667	arrival	50% subclinical
0.5	both	0.9	both	50% subclinical
0.5	departure.only	0.833333333333333	departure	50% subclinical
0.5	arrival.only	0.833333333333333	arrival	50% subclinical
0.5	both	0.8	both	50% subclinical
0.5	departure.only	0.9	departure	50% subclinical
0.5	arrival.only	0.966666666666667	arrival	50% subclinical
0.5	both	0.9	both	50% subclinical
0.5	departure.only	0.933333333333333	departure	50% subclinical
0.5	arrival.only	0.8	arrival	50% subclinical
0.5	both	0.866666666666667	both	50% subclinical
0.5	departure.only	0.933333333333333	departure	50% subclinical
0.5	arrival.only	0.866666666666667	arrival	50% subclinical
0.5	both	0.833333333333333	both	50% subclinical
0.5	departure.only	0.733333333333333	departure	50% subclinical
0.5	arrival.only	0.833333333333333	arrival	50% subclinical
0.5	both	0.766666666666667	both	50% subclinical
0.5	departure.only	0.966666666666667	departure	50% subclinical
0.5	arrival.only	0.8	arrival	50% subclinical
0.5	both	0.866666666666667	both	50% subclinical
0.5	departure.only	0.7	departure	50% subclinical
0.5	arrival.only	0.666666666666667	arrival	50% subclinical
0.5	both	0.633333333333333	both	50% subclinical
0.5	departure.only	0.933333333333333	departure	50% subclinical
0.5	arrival.only	0.766666666666667	arrival	50% subclinical
0.5	both	0.866666666666667	both	50% subclinical
0.5	departure.only	0.9	departure	50% subclinical
0.5	arrival.only	0.9	arrival	50% subclinical
0.5	both	0.833333333333333	both	50% subclinical
0.5	departure.only	0.9	departure	50% subclinical
0.5	arrival.only	0.833333333333333	arrival	50% subclinical
0.5	both	0.833333333333333	both	50% subclinical
0.5	departure.only	0.966666666666667	departure	50% subclinical
0.5	arrival.only	0.8	arrival	50% subclinical
0.5	both	0.766666666666667	both	50% subclinical
0.5	departure.only	0.8	departure	50% subclinical
0.5	arrival.only	0.833333333333333	arrival	50% subclinical
0.5	both	0.866666666666667	both	50% subclinical
0.5	departure.only	0.9	departure	50% subclinical
0.5	arrival.only	0.933333333333333	arrival	50% subclinical
0.5	both	0.733333333333333	both	50% subclinical
0.5	departure.only	0.9	departure	50% subclinical
0.5	arrival.only	0.9	arrival	50% subclinical
0.5	both	0.9	both	50% subclinical
0.5	departure.only	0.766666666666667	departure	50% subclinical
0.5	arrival.only	0.833333333333333	arrival	50% subclinical
0.5	both	0.766666666666667	both	50% subclinical
0.5	departure.only	0.933333333333333	departure	50% subclinical
0.5	arrival.only	0.9	arrival	50% subclinical
0.5	both	0.766666666666667	both	50% subclinical
0.5	departure.only	0.8	departure	50% subclinical
0.5	arrival.only	0.933333333333333	arrival	50% subclinical
0.5	both	0.866666666666667	both	50% subclinical
0.5	departure.only	0.866666666666667	departure	50% subclinical
0.5	arrival.only	0.966666666666667	arrival	50% subclinical
0.5	both	0.933333333333333	both	50% subclinical
0.5	departure.only	0.833333333333333	departure	50% subclinical
0.5	arrival.only	0.733333333333333	arrival	50% subclinical
0.5	both	0.8	both	50% subclinical
0.5	departure.only	0.9	departure	50% subclinical
0.5	arrival.only	0.8	arrival	50% subclinical
0.5	both	0.733333333333333	both	50% subclinical
0.5	departure.only	0.833333333333333	departure	50% subclinical
0.5	arrival.only	0.833333333333333	arrival	50% subclinical
0.5	both	0.833333333333333	both	50% subclinical
0.5	departure.only	0.9	departure	50% subclinical
0.5	arrival.only	0.866666666666667	arrival	50% subclinical
0.5	both	0.7	both	50% subclinical
0.5	departure.only	0.9	departure	50% subclinical
0.5	arrival.only	0.866666666666667	arrival	50% subclinical
0.5	both	0.8	both	50% subclinical
0.5	departure.only	0.833333333333333	departure	50% subclinical
0.5	arrival.only	0.9	arrival	50% subclinical
0.5	both	0.766666666666667	both	50% subclinical
0.5	departure.only	0.9	departure	50% subclinical
0.5	arrival.only	0.866666666666667	arrival	50% subclinical
0.5	both	0.9	both	50% subclinical
0.5	departure.only	0.9	departure	50% subclinical
0.5	arrival.only	0.833333333333333	arrival	50% subclinical
0.5	both	0.933333333333333	both	50% subclinical
0.5	departure.only	0.833333333333333	departure	50% subclinical
0.5	arrival.only	0.766666666666667	arrival	50% subclinical
0.5	both	0.766666666666667	both	50% subclinical
0.5	departure.only	0.866666666666667	departure	50% subclinical
0.5	arrival.only	0.8	arrival	50% subclinical
0.5	both	0.933333333333333	both	50% subclinical
0.5	departure.only	0.933333333333333	departure	50% subclinical
0.5	arrival.only	0.833333333333333	arrival	50% subclinical
0.5	both	0.7	both	50% subclinical
0.5	departure.only	0.933333333333333	departure	50% subclinical
0.5	arrival.only	0.933333333333333	arrival	50% subclinical
0.5	both	0.866666666666667	both	50% subclinical
0.5	departure.only	0.666666666666667	departure	50% subclinical
0.5	arrival.only	0.833333333333333	arrival	50% subclinical
0.5	both	0.6	both	50% subclinical
0.5	departure.only	0.966666666666667	departure	50% subclinical
0.5	arrival.only	0.933333333333333	arrival	50% subclinical
0.5	both	0.9	both	50% subclinical
0.5	departure.only	0.833333333333333	departure	50% subclinical
0.5	arrival.only	0.866666666666667	arrival	50% subclinical
0.5	both	0.833333333333333	both	50% subclinical
0.5	departure.only	0.866666666666667	departure	50% subclinical
0.5	arrival.only	0.933333333333333	arrival	50% subclinical
0.5	both	0.8	both	50% subclinical
0.5	departure.only	0.9	departure	50% subclinical
0.5	arrival.only	0.833333333333333	arrival	50% subclinical
0.5	both	0.9	both	50% subclinical
0.5	departure.only	0.866666666666667	departure	50% subclinical
0.5	arrival.only	0.8	arrival	50% subclinical
0.5	both	0.8	both	50% subclinical
0.5	departure.only	0.966666666666667	departure	50% subclinical
0.5	arrival.only	0.933333333333333	arrival	50% subclinical
0.5	both	0.766666666666667	both	50% subclinical
0.5	departure.only	0.833333333333333	departure	50% subclinical
0.5	arrival.only	0.833333333333333	arrival	50% subclinical
0.5	both	0.833333333333333	both	50% subclinical
0.5	departure.only	0.866666666666667	departure	50% subclinical
0.5	arrival.only	0.7	arrival	50% subclinical
0.5	both	0.666666666666667	both	50% subclinical
0.5	departure.only	0.866666666666667	departure	50% subclinical
0.5	arrival.only	0.9	arrival	50% subclinical
0.5	both	0.766666666666667	both	50% subclinical
0.5	departure.only	0.833333333333333	departure	50% subclinical
0.5	arrival.only	0.8	arrival	50% subclinical
0.5	both	0.7	both	50% subclinical
0.5	departure.only	0.833333333333333	departure	50% subclinical
0.5	arrival.only	0.833333333333333	arrival	50% subclinical
0.5	both	0.9	both	50% subclinical
0.5	departure.only	0.9	departure	50% subclinical
0.5	arrival.only	0.8	arrival	50% subclinical
0.5	both	0.866666666666667	both	50% subclinical
0.5	departure.only	0.833333333333333	departure	50% subclinical
[truncated: 7,001 more rows]
