# Supplementary material for: Estimated effectiveness of symptom and risk screening to prevent the spread of COVID-19
Source: eLife. 2020 Feb 24;9:e55570. doi: 10.7554/eLife.55570 (PMC7060038; doi:10.7554/eLife.55570)
Supplement: Figure 3—source data 2. [file elife-55570-fig3-data2.csv]

scenario	strategy	name	value	outcome
5% subclinical	arrival	d.fever	0	detected: departure fever screen
5% subclinical	arrival	d.risk	0	detected: departure risk screen
5% subclinical	arrival	a.fever	0.233309626171308	detected: arrival fever screen
5% subclinical	arrival	a.risk	0.0258856435893742	detected: arrival risk screen
5% subclinical	arrival	m.b	0.0149163507356079	missed: had both
5% subclinical	arrival	m.f	0.0600012899554362	missed: had fever
5% subclinical	arrival	m.r	0.13161309972038	missed: had risk awareness
5% subclinical	arrival	nd	0.534273989827894	missed: undetectable
5% subclinical	both	d.fever	0.16908873772127	detected: departure fever screen
5% subclinical	both	d.risk	0.0280292300730663	detected: departure risk screen
5% subclinical	both	a.fever	0.100869494720078	detected: arrival fever screen
5% subclinical	both	a.risk	0.0202887886614747	detected: arrival risk screen
5% subclinical	both	m.b	0.00607212298911829	missed: had both
5% subclinical	both	m.f	0.0287982543515205	missed: had fever
5% subclinical	both	m.r	0.11258743985638	missed: had risk awareness
5% subclinical	both	nd	0.534265931627091	missed: undetectable
5% subclinical	departure	d.fever	0.16675782570845	detected: departure fever screen
5% subclinical	departure	d.risk	0.0282305438642915	detected: departure risk screen
5% subclinical	departure	a.fever	0	detected: arrival fever screen
5% subclinical	departure	a.risk	0	detected: arrival risk screen
5% subclinical	departure	m.b	0.0106491297238863	missed: had both
5% subclinical	departure	m.f	0.0433552881048384	missed: had fever
5% subclinical	departure	m.r	0.148979753528497	missed: had risk awareness
5% subclinical	departure	nd	0.602027459070037	missed: undetectable
25% subclinical	arrival	d.fever	0	detected: departure fever screen
25% subclinical	arrival	d.risk	0	detected: departure risk screen
25% subclinical	arrival	a.fever	0.182917561898414	detected: arrival fever screen
25% subclinical	arrival	a.risk	0.0276465937013419	detected: arrival risk screen
25% subclinical	arrival	m.b	0.011636586673826	missed: had both
25% subclinical	arrival	m.f	0.0472084960033455	missed: had fever
25% subclinical	arrival	m.r	0.144810617487938	missed: had risk awareness
25% subclinical	arrival	nd	0.585780144235134	missed: undetectable
25% subclinical	both	d.fever	0.132583120524609	detected: departure fever screen
25% subclinical	both	d.risk	0.0293143669589625	detected: departure risk screen
25% subclinical	both	a.fever	0.0791888735787973	detected: arrival fever screen
25% subclinical	both	a.risk	0.0219830667454277	detected: arrival risk screen
25% subclinical	both	m.b	0.00473453203911365	missed: had both
25% subclinical	both	m.f	0.0225373963067041	missed: had fever
25% subclinical	both	m.r	0.123757516862558	missed: had risk awareness
25% subclinical	both	nd	0.585901126983828	missed: undetectable
25% subclinical	departure	d.fever	0.132537951031006	detected: departure fever screen
25% subclinical	departure	d.risk	0.0292840279176024	detected: departure risk screen
25% subclinical	departure	a.fever	0	detected: arrival fever screen
25% subclinical	departure	a.risk	0	detected: arrival risk screen
25% subclinical	departure	m.b	0.00842493231297174	missed: had both
25% subclinical	departure	m.f	0.0341872314095312	missed: had fever
25% subclinical	departure	m.r	0.157628016653365	missed: had risk awareness
25% subclinical	departure	nd	0.637937840675523	missed: undetectable
50% subclinical	arrival	d.fever	0	detected: departure fever screen
50% subclinical	arrival	d.risk	0	detected: departure risk screen
50% subclinical	arrival	a.fever	0.122008314347995	detected: arrival fever screen
50% subclinical	arrival	a.risk	0.0296543452319101	detected: arrival risk screen
50% subclinical	arrival	m.b	0.00777731005940474	missed: had both
50% subclinical	arrival	m.f	0.0312736670686553	missed: had fever
50% subclinical	arrival	m.r	0.160163873148475	missed: had risk awareness
50% subclinical	arrival	nd	0.64912249014356	missed: undetectable
50% subclinical	both	d.fever	0.0884487516600505	detected: departure fever screen
50% subclinical	both	d.risk	0.0307824463578922	detected: departure risk screen
50% subclinical	both	a.fever	0.0529755958283943	detected: arrival fever screen
50% subclinical	both	a.risk	0.0239478154498263	detected: arrival risk screen
50% subclinical	both	m.b	0.00317481780608901	missed: had both
50% subclinical	both	m.f	0.0150321551605545	missed: had fever
50% subclinical	both	m.r	0.136852138970459	missed: had risk awareness
50% subclinical	both	nd	0.648786278766734	missed: undetectable
50% subclinical	departure	d.fever	0.0887926963272693	detected: departure fever screen
50% subclinical	departure	d.risk	0.0307824773974029	detected: departure risk screen
50% subclinical	departure	a.fever	0	detected: arrival fever screen
50% subclinical	departure	a.risk	0	detected: arrival risk screen
50% subclinical	departure	m.b	0.00569990993792555	missed: had both
50% subclinical	departure	m.f	0.0229708028253153	missed: had fever
50% subclinical	departure	m.r	0.168580954445929	missed: had risk awareness
50% subclinical	departure	nd	0.683173159066158	missed: undetectable
