# Supplementary material for: Estimated effectiveness of symptom and risk screening to prevent the spread of COVID-19
Source: eLife. 2020 Feb 24;9:e55570. doi: 10.7554/eLife.55570 (PMC7060038; doi:10.7554/eLife.55570)
Supplement: Figure 3—source data 3. [file elife-55570-fig3-data3.csv]

strategy	scenario	nthTraveller	frac
both	5% subclinical	1	0.338
both	5% subclinical	2	0.11
both	5% subclinical	3	0.037
both	5% subclinical	4+	0.019
both	25% subclinical	1	0.283
both	25% subclinical	2	0.085
both	25% subclinical	3	0.022
both	25% subclinical	4+	0.006
both	50% subclinical	1	0.186
both	50% subclinical	2	0.036
both	50% subclinical	3	0.01
both	50% subclinical	4+	0.003
arrival	5% subclinical	1	0.251
arrival	5% subclinical	2	0.069
arrival	5% subclinical	3	0.026
arrival	5% subclinical	4+	0.012
arrival	25% subclinical	1	0.205
arrival	25% subclinical	2	0.063
arrival	25% subclinical	3	0.016
arrival	25% subclinical	4+	0.004
arrival	50% subclinical	1	0.166
arrival	50% subclinical	2	0.024
arrival	50% subclinical	3	0.006
arrival	50% subclinical	4+	0.002
departure	5% subclinical	1	0.188
departure	5% subclinical	2	0.041
departure	5% subclinical	3	0.008
departure	5% subclinical	4+	0.002
departure	25% subclinical	1	0.164
departure	25% subclinical	2	0.027
departure	25% subclinical	3	0.003
departure	25% subclinical	4+	0
departure	50% subclinical	1	0.119
departure	50% subclinical	2	0.017
departure	50% subclinical	3	0.003
departure	50% subclinical	4+	0.001
