# Supplementary material for: Estimated effectiveness of symptom and risk screening to prevent the spread of COVID-19
Source: eLife. 2020 Feb 24;9:e55570. doi: 10.7554/eLife.55570 (PMC7060038; doi:10.7554/eLife.55570)
Supplement: Figure 4—source data 1. — Source data for Figure 4—figures supplement 2 can be found as a. csv file in the supplementary code. [file elife-55570-fig4-data1.csv]

par	coef	pval	NOTsubclinical	screeningType	is.signif.wBonferroni	ctxt
frac aware of risk	0.223039682520042	9.72309069340073e-13	50% subclinical	arrival	TRUE	0.22*
thermal scanner sensitivity	0.228696233182078	2.47619466463208e-13	50% subclinical	arrival	TRUE	0.23*
questionnaire sensitivity	0.146517131946117	3.27754081128078e-06	50% subclinical	arrival	TRUE	0.15*
mean incubation (days)	-0.171837881380622	4.55358386739816e-08	50% subclinical	arrival	TRUE	-0.17*
R0	-0.294429144412896	1.89523571632241e-21	50% subclinical	arrival	TRUE	-0.29*
onset to isolation (days)	0.193337291805032	7.07209759070069e-10	50% subclinical	arrival	TRUE	0.19*
frac aware of risk	0.14561996734681	3.76744334302915e-06	25% subclinical	arrival	TRUE	0.15*
thermal scanner sensitivity	0.230590055582707	1.55358721974339e-13	25% subclinical	arrival	TRUE	0.23*
questionnaire sensitivity	0.112479863169458	0.000365536042385147	25% subclinical	arrival	TRUE	0.11*
mean incubation (days)	-0.261026517205927	4.86424619272897e-17	25% subclinical	arrival	TRUE	-0.26*
R0	-0.348960678141553	5.20068473342647e-30	25% subclinical	arrival	TRUE	-0.35*
onset to isolation (days)	0.277806997420451	3.52879867708976e-19	25% subclinical	arrival	TRUE	0.28*
frac aware of risk	0.200485430073696	1.58424630314338e-10	5% subclinical	arrival	TRUE	0.20*
thermal scanner sensitivity	0.30109677616582	2.10815899118572e-22	5% subclinical	arrival	TRUE	0.30*
questionnaire sensitivity	0.126103951281245	6.3679935205869e-05	5% subclinical	arrival	TRUE	0.13*
mean incubation (days)	-0.302535178837532	1.30272888605722e-22	5% subclinical	arrival	TRUE	-0.30*
R0	-0.411700261141536	3.44204446420162e-42	5% subclinical	arrival	TRUE	-0.41*
onset to isolation (days)	0.296538628429768	9.51969315670515e-22	5% subclinical	arrival	TRUE	0.30*
frac aware of risk	0.304762952921294	6.14834264694116e-23	50% subclinical	departure	TRUE	0.30*
thermal scanner sensitivity	0.110611174038249	0.000457954758597739	50% subclinical	departure	TRUE	0.11*
questionnaire sensitivity	0.236435449223688	3.58996666505556e-14	50% subclinical	departure	TRUE	0.24*
mean incubation (days)	-0.18074085181267	8.62090380329269e-09	50% subclinical	departure	TRUE	-0.18*
R0	-0.291747960990148	4.50975137217176e-21	50% subclinical	departure	TRUE	-0.29*
onset to isolation (days)	0.197275250710563	3.12340879270826e-10	50% subclinical	departure	TRUE	0.20*
frac aware of risk	0.239259132313149	1.74404024814307e-14	25% subclinical	departure	TRUE	0.24*
thermal scanner sensitivity	0.195259297528125	4.75603684156495e-10	25% subclinical	departure	TRUE	0.20*
questionnaire sensitivity	0.193274835045481	7.16337797325236e-10	25% subclinical	departure	TRUE	0.19*
mean incubation (days)	-0.27902374947095	2.4356164438594e-19	25% subclinical	departure	TRUE	-0.28*
R0	-0.424801242699628	4.41234709779134e-45	25% subclinical	departure	TRUE	-0.42*
onset to isolation (days)	0.324746869953337	5.43583942672799e-26	25% subclinical	departure	TRUE	0.32*
frac aware of risk	0.256823507350575	1.58287966162011e-16	5% subclinical	departure	TRUE	0.26*
thermal scanner sensitivity	0.126350752577931	6.15907836935823e-05	5% subclinical	departure	TRUE	0.13*
questionnaire sensitivity	0.156545290087195	6.52786994127819e-07	5% subclinical	departure	TRUE	0.16*
mean incubation (days)	-0.296912244941715	8.42167735496096e-22	5% subclinical	departure	TRUE	-0.30*
R0	-0.428867517442432	5.25678433672235e-46	5% subclinical	departure	TRUE	-0.43*
onset to isolation (days)	0.35857632895088	1.04489671438708e-31	5% subclinical	departure	TRUE	0.36*
frac aware of risk	0.223702660195049	8.29861958177323e-13	50% subclinical	both	TRUE	0.22*
thermal scanner sensitivity	0.124117980711523	8.3102496387694e-05	50% subclinical	both	TRUE	0.12*
questionnaire sensitivity	0.181590079587099	7.32285062971781e-09	50% subclinical	both	TRUE	0.18*
mean incubation (days)	-0.156536609363231	6.53728907576799e-07	50% subclinical	both	TRUE	-0.16*
R0	-0.236646630325933	3.40236871333894e-14	50% subclinical	both	TRUE	-0.24*
onset to isolation (days)	0.207041460932567	3.82262468168192e-11	50% subclinical	both	TRUE	0.21*
frac aware of risk	0.169525873676533	6.91921606030991e-08	25% subclinical	both	TRUE	0.17*
thermal scanner sensitivity	0.242681865699392	7.17903566375851e-15	25% subclinical	both	TRUE	0.24*
questionnaire sensitivity	0.232687587747353	9.22590857292274e-14	25% subclinical	both	TRUE	0.23*
mean incubation (days)	-0.204735070974316	6.33791734604302e-11	25% subclinical	both	TRUE	-0.20*
R0	-0.389589481364821	1.36464455244555e-37	25% subclinical	both	TRUE	-0.39*
onset to isolation (days)	0.321700437277741	1.64384565404932e-25	25% subclinical	both	TRUE	0.32*
frac aware of risk	0.173773195456772	3.19417266225932e-08	5% subclinical	both	TRUE	0.17*
thermal scanner sensitivity	0.147048594645099	3.01675826008707e-06	5% subclinical	both	TRUE	0.15*
questionnaire sensitivity	0.151040220565663	1.60347640005868e-06	5% subclinical	both	TRUE	0.15*
mean incubation (days)	-0.224663846951532	6.58982670303551e-13	5% subclinical	both	TRUE	-0.22*
R0	-0.445566469676488	6.18737717725706e-50	5% subclinical	both	TRUE	-0.45*
onset to isolation (days)	0.338995717468523	2.59140926900183e-28	5% subclinical	both	TRUE	0.34*
